# Supplementary material for: Interleukin-15-armored GPC3-CAR T cells for patients with solid cancers
Source: Research Square preprint supplement (doi:10.21203/rs.3.rs-4103623/v1), 2024-04-03
Supplement: Supplementary file 1 [file 795be88feeecf60fc95ba190.xlsx]

## Sheet: Key
Analysis	Comparison
gsea_report_for_pos_CAR.tsv	Enriched genesets from genes that were up regulated in peripheral blood CAR T cells compared to product
gsea_report_for_pos_15CAR.tsv	Enriched genesets from genes that were up regulated in peripheral blood 15.CAR T cells compared to product
gsea_report_for_neg_CAR.tsv	Enriched genesets from genes that were down regulated in peripheral blood CAR T cells compared to product
gsea_report_for_neg_15CAR.tsv	Enriched genesets from genes that were down regulated in peripheral blood 15.CAR T cells compared to product
gsea_report_for_neg_NR.tsv	Enriched genesets from genes that were down regulated in biopsy non-responder's CAR T cells compared to product
gsea_report_for_neg_R.tsv	Enriched genesets from genes that were down regulated in biopsy responder's CAR T cells compared to product
gsea_report_for_pos_NR.tsv	Enriched genesets from genes that were up regulated in biopsy non-responder's CAR T cells compared to product
gsea_report_for__pos_R.tsv	Enriched genesets from genes that were up regulated in biopsy responder's CAR T cells compared to product

## Sheet: gsea_report_for_pos_CAR.tsv
NAME	GS<br> follow link to MSigDB	GS DETAILS	SIZE	ES	NES	NOM p-val	FDR q-val	FWER p-val	RANK AT MAX	LEADING EDGE
GOCC_T_CELL_RECEPTOR_COMPLEX	GOCC_T_CELL_RECEPTOR_COMPLEX	Details ...	88	0.845278	3.20722	0	0	0	871	tags=83%, list=12%, signal=94%
GOMF_MHC_PROTEIN_BINDING	GOMF_MHC_PROTEIN_BINDING	Details ...	33	0.77144	2.45949	0	0	0	451	tags=45%, list=6%, signal=48%
GOBP_NATURAL_KILLER_CELL_ACTIVATION	GOBP_NATURAL_KILLER_CELL_ACTIVATION	Details ...	52	0.692269	2.43693	0	0	0	341	tags=33%, list=5%, signal=34%
GOBP_NATURAL_KILLER_CELL_MEDIATED_IMMUNITY	GOBP_NATURAL_KILLER_CELL_MEDIATED_IMMUNITY	Details ...	53	0.69757	2.39924	0	0	0	685	tags=45%, list=10%, signal=50%
GOBP_LEUKOCYTE_MEDIATED_CYTOTOXICITY	GOBP_LEUKOCYTE_MEDIATED_CYTOTOXICITY	Details ...	81	0.617549	2.33132	0	0.000135963	0.001	685	tags=46%, list=10%, signal=50%
GOBP_CELLULAR_DEFENSE_RESPONSE	GOBP_CELLULAR_DEFENSE_RESPONSE	Details ...	26	0.793525	2.33407	0	0.000163155	0.001	439	tags=50%, list=6%, signal=53%
GOBP_RESPONSE_TO_LECTIN	GOBP_RESPONSE_TO_LECTIN	Details ...	16	0.877566	2.25223	0	0.000181028	0.002	46	tags=44%, list=1%, signal=44%
GOBP_REGULATION_OF_NATURAL_KILLER_CELL_ACTIVATION	GOBP_REGULATION_OF_NATURAL_KILLER_CELL_ACTIVATION	Details ...	27	0.737223	2.2563	0	0.000203656	0.002	252	tags=37%, list=4%, signal=38%
GOBP_REGULATION_OF_NATURAL_KILLER_CELL_MEDIATED_IMMUNITY	GOBP_REGULATION_OF_NATURAL_KILLER_CELL_MEDIATED_IMMUNITY	Details ...	32	0.730585	2.25638	0	0.00023275	0.002	674	tags=53%, list=10%, signal=59%
GOBP_DEFENSE_RESPONSE_TO_FUNGUS	GOBP_DEFENSE_RESPONSE_TO_FUNGUS	Details ...	13	0.891155	2.21728	0	0.000319965	0.004	109	tags=46%, list=2%, signal=47%
GOBP_NATURAL_KILLER_CELL_ACTIVATION_INVOLVED_IN_IMMUNE_RESPONSE	GOBP_NATURAL_KILLER_CELL_ACTIVATION_INVOLVED_IN_IMMUNE_RESPONSE	Details ...	13	0.866245	2.17399	0	0.000863683	0.011	293	tags=46%, list=4%, signal=48%
GOBP_POSITIVE_REGULATION_OF_NATURAL_KILLER_CELL_MEDIATED_IMMUNITY	GOBP_POSITIVE_REGULATION_OF_NATURAL_KILLER_CELL_MEDIATED_IMMUNITY	Details ...	20	0.766248	2.13184	0	0.00179751	0.026	439	tags=55%, list=6%, signal=59%
GOBP_REGULATION_OF_LEUKOCYTE_MEDIATED_CYTOTOXICITY	GOBP_REGULATION_OF_LEUKOCYTE_MEDIATED_CYTOTOXICITY	Details ...	52	0.611432	2.12106	0	0.00233067	0.035	674	tags=50%, list=10%, signal=55%
GOBP_RESPONSE_TO_FUNGUS	GOBP_RESPONSE_TO_FUNGUS	Details ...	18	0.781711	2.10929	0	0.0027358	0.045	109	tags=33%, list=2%, signal=34%
GOMF_MHC_CLASS_I_PROTEIN_BINDING	GOMF_MHC_CLASS_I_PROTEIN_BINDING	Details ...	17	0.784608	2.08113	0	0.00484616	0.084	451	tags=41%, list=6%, signal=44%
GOCC_PROTEIN_COMPLEX_INVOLVED_IN_CELL_ADHESION	GOCC_PROTEIN_COMPLEX_INVOLVED_IN_CELL_ADHESION	Details ...	14	0.807787	2.07048	0	0.00598504	0.107	478	tags=57%, list=7%, signal=61%
GOBP_DISRUPTION_OF_ANATOMICAL_STRUCTURE_IN_ANOTHER_ORGANISM	GOBP_DISRUPTION_OF_ANATOMICAL_STRUCTURE_IN_ANOTHER_ORGANISM	Details ...	28	0.678808	2.04548	0	0.00925096	0.173	878	tags=50%, list=13%, signal=57%
GOBP_FC_GAMMA_RECEPTOR_SIGNALING_PATHWAY	GOBP_FC_GAMMA_RECEPTOR_SIGNALING_PATHWAY	Details ...	20	0.724564	2.02989	0	0.0119698	0.232	694	tags=40%, list=10%, signal=44%
GOBP_INNATE_IMMUNE_RESPONSE_ACTIVATING_CELL_SURFACE_RECEPTOR_SIGNALING_PATHWAY	GOBP_INNATE_IMMUNE_RESPONSE_ACTIVATING_CELL_SURFACE_RECEPTOR_SIGNALING_PATHWAY	Details ...	47	0.596746	2.00569	0	0.0164773	0.343	507	tags=28%, list=7%, signal=30%
GOBP_NEGATIVE_REGULATION_OF_IMMUNE_EFFECTOR_PROCESS	GOBP_NEGATIVE_REGULATION_OF_IMMUNE_EFFECTOR_PROCESS	Details ...	57	0.584521	2.00871	0	0.0165032	0.328	1103	tags=49%, list=16%, signal=58%
GOBP_NATURAL_KILLER_CELL_DEGRANULATION	GOBP_NATURAL_KILLER_CELL_DEGRANULATION		11	0.834996	1.99922	0.00274725	0.0171019	0.372	293	tags=36%, list=4%, signal=38%
GOBP_NEGATIVE_REGULATION_OF_LEUKOCYTE_MEDIATED_IMMUNITY	GOBP_NEGATIVE_REGULATION_OF_LEUKOCYTE_MEDIATED_IMMUNITY		38	0.615876	1.98716	0	0.0196283	0.434	1035	tags=58%, list=15%, signal=68%
GOCC_INTEGRIN_COMPLEX	GOCC_INTEGRIN_COMPLEX		11	0.836889	1.97387	0	0.0230882	0.499	478	tags=73%, list=7%, signal=78%
GOBP_NEGATIVE_REGULATION_OF_NATURAL_KILLER_CELL_MEDIATED_IMMUNITY	GOBP_NEGATIVE_REGULATION_OF_NATURAL_KILLER_CELL_MEDIATED_IMMUNITY		16	0.760756	1.96765	0	0.0231257	0.534	1010	tags=69%, list=14%, signal=80%
GOCC_CYTOLYTIC_GRANULE	GOCC_CYTOLYTIC_GRANULE		13	0.780805	1.96767	0	0.0240893	0.534	727	tags=54%, list=10%, signal=60%
GOBP_NEGATIVE_REGULATION_OF_B_CELL_ACTIVATION	GOBP_NEGATIVE_REGULATION_OF_B_CELL_ACTIVATION		16	0.746665	1.962	0	0.0242938	0.566	1171	tags=69%, list=17%, signal=82%
GOBP_REGULATION_OF_CELL_KILLING	GOBP_REGULATION_OF_CELL_KILLING		59	0.543897	1.95718	0	0.0251682	0.592	674	tags=46%, list=10%, signal=50%
GOBP_POSITIVE_REGULATION_OF_CELL_KILLING	GOBP_POSITIVE_REGULATION_OF_CELL_KILLING		41	0.578197	1.92394	0	0.0413474	0.774	671	tags=54%, list=10%, signal=59%
GOCC_ALPHA_BETA_T_CELL_RECEPTOR_COMPLEX	GOCC_ALPHA_BETA_T_CELL_RECEPTOR_COMPLEX		10	0.855108	1.91954	0	0.0430881	0.802	685	tags=80%, list=10%, signal=89%

## Sheet: gsea_report_for_pos_15CAR.tsv
NAME	GS<br> follow link to MSigDB	GS DETAILS	SIZE	ES	NES	NOM p-val	FDR q-val	FWER p-val	RANK AT MAX	LEADING EDGE
GOBP_NATURAL_KILLER_CELL_ACTIVATION	GOBP_NATURAL_KILLER_CELL_ACTIVATION	Details ...	52	0.715774	2.5064	0	0	0	868	tags=54%, list=12%, signal=61%
GOBP_RESPONSE_TO_LECTIN	GOBP_RESPONSE_TO_LECTIN	Details ...	16	0.898533	2.45047	0	0	0	161	tags=63%, list=2%, signal=64%
GOBP_NATURAL_KILLER_CELL_MEDIATED_IMMUNITY	GOBP_NATURAL_KILLER_CELL_MEDIATED_IMMUNITY	Details ...	53	0.69559	2.44521	0	0	0	909	tags=53%, list=13%, signal=60%
GOBP_INNATE_IMMUNE_RESPONSE_ACTIVATING_CELL_SURFACE_RECEPTOR_SIGNALING_PATHWAY	GOBP_INNATE_IMMUNE_RESPONSE_ACTIVATING_CELL_SURFACE_RECEPTOR_SIGNALING_PATHWAY	Details ...	47	0.692691	2.35349	0	0	0	696	tags=45%, list=10%, signal=49%
GOBP_REGULATION_OF_NATURAL_KILLER_CELL_ACTIVATION	GOBP_REGULATION_OF_NATURAL_KILLER_CELL_ACTIVATION	Details ...	27	0.779639	2.29161	0	0.000156859	0.001	264	tags=48%, list=4%, signal=50%
GOBP_REGULATION_OF_NATURAL_KILLER_CELL_MEDIATED_IMMUNITY	GOBP_REGULATION_OF_NATURAL_KILLER_CELL_MEDIATED_IMMUNITY	Details ...	32	0.748306	2.30784	0	0.000188231	0.001	868	tags=63%, list=12%, signal=71%
GOBP_FC_GAMMA_RECEPTOR_SIGNALING_PATHWAY	GOBP_FC_GAMMA_RECEPTOR_SIGNALING_PATHWAY	Details ...	20	0.807712	2.23021	0	0.000818614	0.006	488	tags=50%, list=7%, signal=54%
GOBP_FC_RECEPTOR_SIGNALING_PATHWAY	GOBP_FC_RECEPTOR_SIGNALING_PATHWAY	Details ...	31	0.708829	2.18815	0	0.000868141	0.01	553	tags=39%, list=8%, signal=42%
GOBP_NEGATIVE_REGULATION_OF_NATURAL_KILLER_CELL_MEDIATED_IMMUNITY	GOBP_NEGATIVE_REGULATION_OF_NATURAL_KILLER_CELL_MEDIATED_IMMUNITY	Details ...	16	0.838748	2.20778	0	0.000953281	0.008	774	tags=69%, list=11%, signal=77%
GOBP_LEUKOCYTE_MEDIATED_CYTOTOXICITY	GOBP_LEUKOCYTE_MEDIATED_CYTOTOXICITY	Details ...	81	0.589705	2.18987	0	0.000954956	0.01	774	tags=44%, list=11%, signal=49%
GOCC_T_CELL_RECEPTOR_COMPLEX	GOCC_T_CELL_RECEPTOR_COMPLEX	Details ...	88	0.57898	2.19019	0	0.00106106	0.01	1764	tags=63%, list=25%, signal=82%
GOBP_NEGATIVE_REGULATION_OF_IMMUNE_EFFECTOR_PROCESS	GOBP_NEGATIVE_REGULATION_OF_IMMUNE_EFFECTOR_PROCESS	Details ...	57	0.608885	2.15212	0	0.00154443	0.021	774	tags=46%, list=11%, signal=51%
GOBP_DEFENSE_RESPONSE_TO_FUNGUS	GOBP_DEFENSE_RESPONSE_TO_FUNGUS	Details ...	13	0.846888	2.15525	0	0.00159341	0.02	161	tags=54%, list=2%, signal=55%
GOBP_IMMUNE_RESPONSE_REGULATING_CELL_SURFACE_RECEPTOR_SIGNALING_PATHWAY_INVOLVED_IN_PHAGOCYTOSIS	GOBP_IMMUNE_RESPONSE_REGULATING_CELL_SURFACE_RECEPTOR_SIGNALING_PATHWAY_INVOLVED_IN_PHAGOCYTOSIS	Details ...	16	0.804173	2.12374	0	0.00252397	0.037	442	tags=50%, list=6%, signal=53%
GOCC_CYTOLYTIC_GRANULE	GOCC_CYTOLYTIC_GRANULE	Details ...	13	0.845254	2.11171	0	0.00292839	0.046	364	tags=54%, list=5%, signal=57%
GOBP_RESPONSE_TO_FUNGUS	GOBP_RESPONSE_TO_FUNGUS	Details ...	18	0.780972	2.09907	0	0.00370806	0.061	161	tags=39%, list=2%, signal=40%
GOCC_AZUROPHIL_GRANULE_MEMBRANE	GOCC_AZUROPHIL_GRANULE_MEMBRANE	Details ...	39	0.65816	2.0928	0	0.0037725	0.066	1770	tags=56%, list=25%, signal=75%
GOBP_NEGATIVE_REGULATION_OF_CELL_ACTIVATION	GOBP_NEGATIVE_REGULATION_OF_CELL_ACTIVATION	Details ...	85	0.544301	2.07316	0	0.00473588	0.095	808	tags=47%, list=12%, signal=53%
GOBP_NEGATIVE_REGULATION_OF_B_CELL_ACTIVATION	GOBP_NEGATIVE_REGULATION_OF_B_CELL_ACTIVATION	Details ...	16	0.762898	2.07708	0	0.00489133	0.09	745	tags=63%, list=11%, signal=70%
GOBP_REGULATION_OF_LEUKOCYTE_MEDIATED_CYTOTOXICITY	GOBP_REGULATION_OF_LEUKOCYTE_MEDIATED_CYTOTOXICITY	Details ...	52	0.60002	2.07417	0	0.00493449	0.094	1022	tags=58%, list=15%, signal=67%
GOBP_FC_RECEPTOR_MEDIATED_STIMULATORY_SIGNALING_PATHWAY	GOBP_FC_RECEPTOR_MEDIATED_STIMULATORY_SIGNALING_PATHWAY		21	0.747863	2.0664	0	0.00501003	0.105	488	tags=43%, list=7%, signal=46%
GOBP_POSITIVE_REGULATION_OF_NATURAL_KILLER_CELL_MEDIATED_IMMUNITY	GOBP_POSITIVE_REGULATION_OF_NATURAL_KILLER_CELL_MEDIATED_IMMUNITY		20	0.73103	2.05554	0	0.00573772	0.124	868	tags=65%, list=12%, signal=74%
GOBP_CELLULAR_DEFENSE_RESPONSE	GOBP_CELLULAR_DEFENSE_RESPONSE		26	0.685978	2.04628	0	0.00636518	0.142	594	tags=46%, list=8%, signal=50%
GOBP_NEGATIVE_REGULATION_OF_INNATE_IMMUNE_RESPONSE	GOBP_NEGATIVE_REGULATION_OF_INNATE_IMMUNE_RESPONSE		60	0.572404	2.03375	0	0.0078519	0.177	925	tags=38%, list=13%, signal=44%
GOBP_REGULATED_EXOCYTOSIS	GOBP_REGULATED_EXOCYTOSIS		82	0.538342	2.02709	0	0.00834064	0.194	868	tags=35%, list=12%, signal=40%
GOBP_DISRUPTION_OF_ANATOMICAL_STRUCTURE_IN_ANOTHER_ORGANISM	GOBP_DISRUPTION_OF_ANATOMICAL_STRUCTURE_IN_ANOTHER_ORGANISM		28	0.678437	2.01874	0	0.00915879	0.221	851	tags=43%, list=12%, signal=49%
GOMF_MHC_PROTEIN_BINDING	GOMF_MHC_PROTEIN_BINDING		33	0.642854	2.01283	0	0.0098129	0.244	939	tags=52%, list=13%, signal=59%
GOBP_SELECTIVE_AUTOPHAGY	GOBP_SELECTIVE_AUTOPHAGY		65	0.55236	2.0036	0	0.0112026	0.28	2115	tags=63%, list=30%, signal=89%
GOBP_NATURAL_KILLER_CELL_ACTIVATION_INVOLVED_IN_IMMUNE_RESPONSE	GOBP_NATURAL_KILLER_CELL_ACTIVATION_INVOLVED_IN_IMMUNE_RESPONSE		13	0.807031	2.00128	0	0.0112118	0.289	868	tags=69%, list=12%, signal=79%
GOBP_NEGATIVE_REGULATION_OF_LEUKOCYTE_MEDIATED_IMMUNITY	GOBP_NEGATIVE_REGULATION_OF_LEUKOCYTE_MEDIATED_IMMUNITY		38	0.617936	1.99717	0	0.0116648	0.31	1020	tags=58%, list=15%, signal=67%
GOMF_CARBOHYDRATE_BINDING	GOMF_CARBOHYDRATE_BINDING		68	0.550192	1.98808	0	0.0122014	0.348	764	tags=29%, list=11%, signal=33%
GOBP_NEGATIVE_REGULATION_OF_INTERLEUKIN_1_PRODUCTION	GOBP_NEGATIVE_REGULATION_OF_INTERLEUKIN_1_PRODUCTION		12	0.827157	1.9933	0	0.0122433	0.324	597	tags=58%, list=9%, signal=64%
GOBP_NEGATIVE_REGULATION_OF_HEMOPOIESIS	GOBP_NEGATIVE_REGULATION_OF_HEMOPOIESIS		42	0.604328	1.98983	0	0.012252	0.34	1086	tags=60%, list=15%, signal=70%
GOBP_ORGANELLE_MEMBRANE_FUSION	GOBP_ORGANELLE_MEMBRANE_FUSION		68	0.543206	1.99002	0	0.0126051	0.339	1920	tags=49%, list=27%, signal=66%
GOBP_MYELOID_LEUKOCYTE_CYTOKINE_PRODUCTION	GOBP_MYELOID_LEUKOCYTE_CYTOKINE_PRODUCTION		23	0.684894	1.96205	0	0.0176056	0.473	1020	tags=57%, list=15%, signal=66%
GOCC_INTEGRIN_COMPLEX	GOCC_INTEGRIN_COMPLEX		11	0.810713	1.95968	0	0.017778	0.487	826	tags=73%, list=12%, signal=82%
GOBP_REGULATION_OF_CELL_KILLING	GOBP_REGULATION_OF_CELL_KILLING		59	0.555267	1.95734	0	0.018036	0.503	774	tags=46%, list=11%, signal=51%
GOBP_MACROPHAGE_CYTOKINE_PRODUCTION	GOBP_MACROPHAGE_CYTOKINE_PRODUCTION		15	0.781636	1.96229	0	0.0180817	0.473	774	tags=67%, list=11%, signal=75%
GOBP_NEGATIVE_REGULATION_OF_RESPONSE_TO_BIOTIC_STIMULUS	GOBP_NEGATIVE_REGULATION_OF_RESPONSE_TO_BIOTIC_STIMULUS		88	0.506846	1.94969	0	0.0187202	0.542	925	tags=34%, list=13%, signal=39%
GOBP_NEGATIVE_REGULATION_OF_LYMPHOCYTE_ACTIVATION	GOBP_NEGATIVE_REGULATION_OF_LYMPHOCYTE_ACTIVATION		74	0.527824	1.95304	0	0.0188003	0.525	808	tags=46%, list=12%, signal=51%
GOBP_MYELOID_LEUKOCYTE_MEDIATED_IMMUNITY	GOBP_MYELOID_LEUKOCYTE_MEDIATED_IMMUNITY		52	0.565876	1.94982	0	0.0191404	0.54	333	tags=29%, list=5%, signal=30%
GOBP_NEGATIVE_REGULATION_OF_EXOCYTOSIS	GOBP_NEGATIVE_REGULATION_OF_EXOCYTOSIS		17	0.722166	1.93375	0	0.0237389	0.639	1101	tags=59%, list=16%, signal=70%
GOBP_TUMOR_NECROSIS_FACTOR_SUPERFAMILY_CYTOKINE_PRODUCTION	GOBP_TUMOR_NECROSIS_FACTOR_SUPERFAMILY_CYTOKINE_PRODUCTION		84	0.506017	1.92497	0	0.0264814	0.697	909	tags=37%, list=13%, signal=42%
GOBP_NEGATIVE_REGULATION_OF_TYPE_I_INTERFERON_PRODUCTION	GOBP_NEGATIVE_REGULATION_OF_TYPE_I_INTERFERON_PRODUCTION		28	0.63513	1.91638	0.00217391	0.0293308	0.733	792	tags=36%, list=11%, signal=40%
GOMF_MHC_CLASS_IB_RECEPTOR_ACTIVITY	GOMF_MHC_CLASS_IB_RECEPTOR_ACTIVITY		5	0.991864	1.91259	0	0.0305934	0.762	61	tags=100%, list=1%, signal=101%
GOBP_SMOOTH_MUSCLE_CONTRACTION	GOBP_SMOOTH_MUSCLE_CONTRACTION		20	0.677971	1.91109	0	0.0306589	0.771	224	tags=30%, list=3%, signal=31%
GOBP_MACROPHAGE_ACTIVATION_INVOLVED_IN_IMMUNE_RESPONSE	GOBP_MACROPHAGE_ACTIVATION_INVOLVED_IN_IMMUNE_RESPONSE		11	0.786602	1.90177	0	0.034401	0.814	161	tags=36%, list=2%, signal=37%
GOMF_MHC_CLASS_I_PROTEIN_COMPLEX_BINDING	GOMF_MHC_CLASS_I_PROTEIN_COMPLEX_BINDING		6	0.923835	1.89706	0	0.0362546	0.839	144	tags=67%, list=2%, signal=68%
GOBP_NEGATIVE_REGULATION_OF_INFLAMMATORY_RESPONSE_TO_ANTIGENIC_STIMULUS	GOBP_NEGATIVE_REGULATION_OF_INFLAMMATORY_RESPONSE_TO_ANTIGENIC_STIMULUS		13	0.775188	1.8955	0	0.0363938	0.844	152	tags=38%, list=2%, signal=39%
GOBP_NEGATIVE_REGULATION_OF_T_HELPER_CELL_DIFFERENTIATION	GOBP_NEGATIVE_REGULATION_OF_T_HELPER_CELL_DIFFERENTIATION		9	0.830421	1.89412	0.00204499	0.0364876	0.85	412	tags=67%, list=6%, signal=71%
GOBP_POSITIVE_REGULATION_OF_CELL_KILLING	GOBP_POSITIVE_REGULATION_OF_CELL_KILLING		41	0.575423	1.88787	0	0.0384291	0.87	1022	tags=59%, list=15%, signal=68%
GOBP_TOLL_LIKE_RECEPTOR_2_SIGNALING_PATHWAY	GOBP_TOLL_LIKE_RECEPTOR_2_SIGNALING_PATHWAY		10	0.832857	1.8889	0	0.0384716	0.867	175	tags=40%, list=2%, signal=41%
GOBP_NATURAL_KILLER_CELL_DEGRANULATION	GOBP_NATURAL_KILLER_CELL_DEGRANULATION		11	0.796282	1.88393	0.0020202	0.0392561	0.88	1112	tags=73%, list=16%, signal=86%
GOBP_NEGATIVE_REGULATION_OF_B_CELL_PROLIFERATION	GOBP_NEGATIVE_REGULATION_OF_B_CELL_PROLIFERATION		9	0.831072	1.88488	0	0.0394025	0.878	745	tags=78%, list=11%, signal=87%
GOBP_POSITIVE_REGULATION_OF_NEURAL_PRECURSOR_CELL_PROLIFERATION	GOBP_POSITIVE_REGULATION_OF_NEURAL_PRECURSOR_CELL_PROLIFERATION		15	0.712085	1.88086	0	0.0401635	0.894	711	tags=47%, list=10%, signal=52%
GOCC_PHAGOPHORE_ASSEMBLY_SITE	GOCC_PHAGOPHORE_ASSEMBLY_SITE		27	0.606198	1.8768	0	0.04158	0.908	1624	tags=56%, list=23%, signal=72%
GOMF_NON_MEMBRANE_SPANNING_PROTEIN_TYROSINE_KINASE_ACTIVITY	GOMF_NON_MEMBRANE_SPANNING_PROTEIN_TYROSINE_KINASE_ACTIVITY		25	0.644785	1.87493	0.00437637	0.0419093	0.909	210	tags=28%, list=3%, signal=29%
GOBP_POSITIVE_REGULATION_OF_NATURAL_KILLER_CELL_ACTIVATION	GOBP_POSITIVE_REGULATION_OF_NATURAL_KILLER_CELL_ACTIVATION		17	0.690482	1.87101	0	0.0435606	0.917	868	tags=59%, list=12%, signal=67%
GOBP_ENDOCYTIC_RECYCLING	GOBP_ENDOCYTIC_RECYCLING		48	0.548372	1.86642	0	0.044447	0.933	1973	tags=56%, list=28%, signal=78%
GOBP_PROTEIN_KINASE_C_SIGNALING	GOBP_PROTEIN_KINASE_C_SIGNALING		8	0.849396	1.8684	0.00226244	0.0446082	0.926	454	tags=50%, list=6%, signal=53%
GOBP_NEGATIVE_REGULATION_OF_CD4_POSITIVE_ALPHA_BETA_T_CELL_DIFFERENTIATION	GOBP_NEGATIVE_REGULATION_OF_CD4_POSITIVE_ALPHA_BETA_T_CELL_DIFFERENTIATION		13	0.741071	1.86664	0.00198807	0.0450134	0.932	412	tags=54%, list=6%, signal=57%
GOBP_POSITIVE_REGULATION_OF_MACROPHAGE_CYTOKINE_PRODUCTION	GOBP_POSITIVE_REGULATION_OF_MACROPHAGE_CYTOKINE_PRODUCTION		10	0.809119	1.85787	0.00203252	0.0489438	0.952	696	tags=70%, list=10%, signal=78%
GOBP_NEGATIVE_REGULATION_OF_CELL_KILLING	GOBP_NEGATIVE_REGULATION_OF_CELL_KILLING		21	0.665919	1.85894	0.00203666	0.0490871	0.951	774	tags=67%, list=11%, signal=75%

## Sheet: gsea_report_for_neg_CAR.tsv
NAME	GS<br> follow link to MSigDB	GS DETAILS	SIZE	ES	NES	NOM p-val	FDR q-val	FWER p-val	RANK AT MAX	LEADING EDGE
GOMF_CYTOKINE_ACTIVITY	GOMF_CYTOKINE_ACTIVITY	Details ...	47	-0.770295	-2.33784	0	0	0	513	tags=53%, list=7%, signal=57%
GOMF_SIGNALING_RECEPTOR_REGULATOR_ACTIVITY	GOMF_SIGNALING_RECEPTOR_REGULATOR_ACTIVITY	Details ...	82	-0.688685	-2.27471	0	0	0	513	tags=37%, list=7%, signal=39%
GOMF_CYTOKINE_RECEPTOR_BINDING	GOMF_CYTOKINE_RECEPTOR_BINDING	Details ...	97	-0.645419	-2.167	0	0	0	513	tags=34%, list=7%, signal=36%
GOBP_TYROSINE_PHOSPHORYLATION_OF_STAT_PROTEIN	GOBP_TYROSINE_PHOSPHORYLATION_OF_STAT_PROTEIN	Details ...	34	-0.72624	-2.06245	0	0.00178913	0.008	229	tags=29%, list=3%, signal=30%
GOMF_STRUCTURAL_CONSTITUENT_OF_CHROMATIN	GOMF_STRUCTURAL_CONSTITUENT_OF_CHROMATIN	Details ...	55	-0.662439	-2.04502	0	0.00204843	0.011	1572	tags=69%, list=22%, signal=88%
GOMF_TUMOR_NECROSIS_FACTOR_RECEPTOR_BINDING	GOMF_TUMOR_NECROSIS_FACTOR_RECEPTOR_BINDING	Details ...	21	-0.818135	-2.06985	0	0.00223642	0.008	513	tags=57%, list=7%, signal=61%
GOBP_EXTERNAL_ENCAPSULATING_STRUCTURE_ORGANIZATION	GOBP_EXTERNAL_ENCAPSULATING_STRUCTURE_ORGANIZATION	Details ...	53	-0.647901	-2.00502	0	0.006066	0.037	742	tags=38%, list=11%, signal=42%
GOBP_POSITIVE_REGULATION_OF_TYROSINE_PHOSPHORYLATION_OF_STAT_PROTEIN	GOBP_POSITIVE_REGULATION_OF_TYROSINE_PHOSPHORYLATION_OF_STAT_PROTEIN	Details ...	24	-0.758605	-1.96779	0	0.010888	0.074	229	tags=38%, list=3%, signal=39%
GOBP_RECEPTOR_SIGNALING_PATHWAY_VIA_STAT	GOBP_RECEPTOR_SIGNALING_PATHWAY_VIA_STAT	Details ...	81	-0.585987	-1.93376	0	0.0178663	0.163	311	tags=20%, list=4%, signal=20%
GOMF_MHC_CLASS_II_PROTEIN_COMPLEX_BINDING	GOMF_MHC_CLASS_II_PROTEIN_COMPLEX_BINDING	Details ...	21	-0.76542	-1.93394	0	0.0195414	0.162	925	tags=62%, list=13%, signal=71%
GOBP_NEGATIVE_REGULATION_OF_EPITHELIAL_CELL_DIFFERENTIATION	GOBP_NEGATIVE_REGULATION_OF_EPITHELIAL_CELL_DIFFERENTIATION	Details ...	11	-0.873531	-1.93765	0	0.0203469	0.152	311	tags=55%, list=4%, signal=57%
GOCC_SPINDLE_MIDZONE	GOCC_SPINDLE_MIDZONE	Details ...	29	-0.704546	-1.9204	0	0.0223336	0.217	1182	tags=69%, list=17%, signal=83%
GOBP_POSITIVE_REGULATION_OF_RELEASE_OF_SEQUESTERED_CALCIUM_ION_INTO_CYTOSOL	GOBP_POSITIVE_REGULATION_OF_RELEASE_OF_SEQUESTERED_CALCIUM_ION_INTO_CYTOSOL	Details ...	15	-0.796293	-1.9072	0	0.0245659	0.282	205	tags=27%, list=3%, signal=27%
GOBP_REGULATION_OF_PODOSOME_ASSEMBLY	GOBP_REGULATION_OF_PODOSOME_ASSEMBLY	Details ...	9	-0.899462	-1.90816	0	0.0256027	0.278	229	tags=56%, list=3%, signal=57%
GOBP_COLUMNAR_CUBOIDAL_EPITHELIAL_CELL_DIFFERENTIATION	GOBP_COLUMNAR_CUBOIDAL_EPITHELIAL_CELL_DIFFERENTIATION	Details ...	36	-0.656278	-1.91097	0	0.0262794	0.268	699	tags=25%, list=10%, signal=28%
GOBP_POSITIVE_REGULATION_OF_PODOSOME_ASSEMBLY	GOBP_POSITIVE_REGULATION_OF_PODOSOME_ASSEMBLY	Details ...	9	-0.899462	-1.88732	0	0.0318688	0.382	229	tags=56%, list=3%, signal=57%
GOMF_GROWTH_FACTOR_ACTIVITY	GOMF_GROWTH_FACTOR_ACTIVITY	Details ...	24	-0.709806	-1.88749	0	0.0337915	0.381	136	tags=29%, list=2%, signal=30%
GOBP_RESPIRATORY_SYSTEM_DEVELOPMENT	GOBP_RESPIRATORY_SYSTEM_DEVELOPMENT	Details ...	60	-0.59665	-1.87871	0	0.0362385	0.43	1154	tags=37%, list=16%, signal=44%
GOBP_MORPHOGENESIS_OF_A_BRANCHING_STRUCTURE	GOBP_MORPHOGENESIS_OF_A_BRANCHING_STRUCTURE	Details ...	46	-0.619626	-1.86599	0	0.046132	0.531	1175	tags=41%, list=17%, signal=49%
GOBP_EPITHELIAL_TUBE_MORPHOGENESIS	GOBP_EPITHELIAL_TUBE_MORPHOGENESIS		91	-0.5583	-1.86104	0	0.0462536	0.571	1175	tags=35%, list=17%, signal=42%
GOBP_GLANDULAR_EPITHELIAL_CELL_DIFFERENTIATION	GOBP_GLANDULAR_EPITHELIAL_CELL_DIFFERENTIATION	Details ...	20	-0.726493	-1.86258	0.00160256	0.0470003	0.562	699	tags=30%, list=10%, signal=33%

## Sheet: gsea_report_for_neg_15CAR.tsv
NAME	GS<br> follow link to MSigDB	GS DETAILS	SIZE	ES	NES	NOM p-val	FDR q-val	FWER p-val	RANK AT MAX	LEADING EDGE
GOMF_STRUCTURAL_CONSTITUENT_OF_CHROMATIN	GOMF_STRUCTURAL_CONSTITUENT_OF_CHROMATIN	Details ...	55	-0.75043	-2.52444	0	0	0	1199	tags=71%, list=17%, signal=85%
GOBP_REGULATION_OF_MITOTIC_NUCLEAR_DIVISION	GOBP_REGULATION_OF_MITOTIC_NUCLEAR_DIVISION	Details ...	70	-0.682828	-2.3867	0	0	0	966	tags=51%, list=14%, signal=59%
GOBP_REGULATION_OF_NUCLEAR_DIVISION	GOBP_REGULATION_OF_NUCLEAR_DIVISION	Details ...	77	-0.661186	-2.36872	0	0	0	966	tags=49%, list=14%, signal=57%
GOMF_CYTOKINE_ACTIVITY	GOMF_CYTOKINE_ACTIVITY	Details ...	47	-0.719745	-2.36717	0	0	0	668	tags=55%, list=10%, signal=61%
GOMF_SIGNALING_RECEPTOR_REGULATOR_ACTIVITY	GOMF_SIGNALING_RECEPTOR_REGULATOR_ACTIVITY	Details ...	82	-0.635619	-2.30849	0	0	0	282	tags=32%, list=4%, signal=33%
GOBP_CHROMOSOME_SEPARATION	GOBP_CHROMOSOME_SEPARATION	Details ...	65	-0.650531	-2.25671	0	0.000147352	0.001	808	tags=43%, list=12%, signal=48%
GOBP_MITOTIC_SPINDLE_ORGANIZATION	GOBP_MITOTIC_SPINDLE_ORGANIZATION	Details ...	95	-0.607414	-2.26447	0	0.00017191	0.001	906	tags=39%, list=13%, signal=44%
GOBP_NEGATIVE_REGULATION_OF_CHROMOSOME_SEGREGATION	GOBP_NEGATIVE_REGULATION_OF_CHROMOSOME_SEGREGATION	Details ...	41	-0.684331	-2.22759	0	0.00022892	0.002	925	tags=51%, list=13%, signal=59%
GOBP_PROTEIN_LOCALIZATION_TO_CHROMOSOME_CENTROMERIC_REGION	GOBP_PROTEIN_LOCALIZATION_TO_CHROMOSOME_CENTROMERIC_REGION	Details ...	31	-0.746303	-2.23017	0	0.000257535	0.002	1142	tags=68%, list=16%, signal=81%
GOCC_NUCLEOSOME	GOCC_NUCLEOSOME	Details ...	83	-0.609881	-2.19833	0	0.000471148	0.005	894	tags=45%, list=13%, signal=50%
GOBP_NEGATIVE_REGULATION_OF_NUCLEAR_DIVISION	GOBP_NEGATIVE_REGULATION_OF_NUCLEAR_DIVISION	Details ...	44	-0.678405	-2.19391	0	0.000517292	0.006	966	tags=52%, list=14%, signal=60%
GOBP_REGULATION_OF_MITOTIC_SISTER_CHROMATID_SEGREGATION	GOBP_REGULATION_OF_MITOTIC_SISTER_CHROMATID_SEGREGATION	Details ...	46	-0.683129	-2.20066	0	0.000518262	0.005	925	tags=48%, list=13%, signal=55%
GOCC_SPINDLE_MIDZONE	GOCC_SPINDLE_MIDZONE	Details ...	29	-0.740453	-2.17534	0	0.000558881	0.007	508	tags=52%, list=7%, signal=56%
GOBP_MITOTIC_SISTER_CHROMATID_SEPARATION	GOBP_MITOTIC_SISTER_CHROMATID_SEPARATION	Details ...	52	-0.654315	-2.16838	0	0.000593474	0.008	925	tags=44%, list=13%, signal=51%
GOBP_REGULATION_OF_SISTER_CHROMATID_SEGREGATION	GOBP_REGULATION_OF_SISTER_CHROMATID_SEGREGATION	Details ...	83	-0.600181	-2.15504	0	0.000623365	0.009	1002	tags=39%, list=14%, signal=44%
GOBP_MITOTIC_CELL_CYCLE_CHECKPOINT_SIGNALING	GOBP_MITOTIC_CELL_CYCLE_CHECKPOINT_SIGNALING	Details ...	97	-0.570895	-2.13422	0	0.000673185	0.011	1030	tags=39%, list=15%, signal=45%
GOBP_METAPHASE_CHROMOSOME_ALIGNMENT	GOBP_METAPHASE_CHROMOSOME_ALIGNMENT	Details ...	80	-0.587855	-2.13631	0	0.000715259	0.011	1142	tags=43%, list=16%, signal=50%
GOCC_OUTER_KINETOCHORE	GOCC_OUTER_KINETOCHORE	Details ...	17	-0.799755	-2.09721	0	0.00150241	0.025	1142	tags=82%, list=16%, signal=98%
GOBP_CHROMOSOME_LOCALIZATION	GOBP_CHROMOSOME_LOCALIZATION	Details ...	90	-0.565192	-2.08791	0	0.00174692	0.031	1142	tags=40%, list=16%, signal=47%
GOBP_CENTROMERE_COMPLEX_ASSEMBLY	GOBP_CENTROMERE_COMPLEX_ASSEMBLY	Details ...	28	-0.710087	-2.08096	0	0.00197139	0.036	1220	tags=61%, list=17%, signal=73%
GOBP_ATTACHMENT_OF_SPINDLE_MICROTUBULES_TO_KINETOCHORE	GOBP_ATTACHMENT_OF_SPINDLE_MICROTUBULES_TO_KINETOCHORE		41	-0.646207	-2.06565	0	0.00287073	0.056	1142	tags=51%, list=16%, signal=61%
GOMF_TUMOR_NECROSIS_FACTOR_RECEPTOR_BINDING	GOMF_TUMOR_NECROSIS_FACTOR_RECEPTOR_BINDING		21	-0.746839	-2.05353	0	0.00340653	0.069	1059	tags=62%, list=15%, signal=73%
GOBP_POSITIVE_REGULATION_OF_PODOSOME_ASSEMBLY	GOBP_POSITIVE_REGULATION_OF_PODOSOME_ASSEMBLY		9	-0.896306	-2.03621	0	0.00488637	0.1	225	tags=56%, list=3%, signal=57%
GOBP_POSITIVE_REGULATION_OF_FIBROBLAST_PROLIFERATION	GOBP_POSITIVE_REGULATION_OF_FIBROBLAST_PROLIFERATION		23	-0.703268	-2.03265	0	0.00524454	0.11	948	tags=52%, list=14%, signal=60%
GOBP_CHROMOSOME_CONDENSATION	GOBP_CHROMOSOME_CONDENSATION		35	-0.658767	-2.02351	0	0.00619952	0.132	778	tags=46%, list=11%, signal=51%
GOBP_ALPHA_AMINO_ACID_METABOLIC_PROCESS	GOBP_ALPHA_AMINO_ACID_METABOLIC_PROCESS		78	-0.551065	-2.01325	0	0.00685856	0.156	1499	tags=45%, list=21%, signal=56%
GOMF_MICROTUBULE_MOTOR_ACTIVITY	GOMF_MICROTUBULE_MOTOR_ACTIVITY		26	-0.702315	-2.0158	0	0.00696222	0.154	508	tags=42%, list=7%, signal=45%
GOMF_NUCLEOBASE_CONTAINING_COMPOUND_KINASE_ACTIVITY	GOMF_NUCLEOBASE_CONTAINING_COMPOUND_KINASE_ACTIVITY		27	-0.671937	-2.00649	0	0.00735379	0.17	1108	tags=44%, list=16%, signal=53%
GOCC_REPLICATION_FORK	GOCC_REPLICATION_FORK		51	-0.602318	-2.00244	0	0.00756655	0.18	1573	tags=59%, list=22%, signal=75%
GOBP_POSITIVE_REGULATION_OF_MITOTIC_NUCLEAR_DIVISION	GOBP_POSITIVE_REGULATION_OF_MITOTIC_NUCLEAR_DIVISION		18	-0.755124	-1.99	0	0.00831638	0.219	564	tags=50%, list=8%, signal=54%
GOBP_POSITIVE_REGULATION_OF_CHROMOSOME_SEPARATION	GOBP_POSITIVE_REGULATION_OF_CHROMOSOME_SEPARATION		24	-0.702793	-1.99005	0	0.00857626	0.219	808	tags=54%, list=12%, signal=61%
GOBP_SPINDLE_ELONGATION	GOBP_SPINDLE_ELONGATION		11	-0.852066	-1.98728	0	0.00865227	0.233	808	tags=82%, list=12%, signal=92%
GOBP_REGULATION_OF_PODOSOME_ASSEMBLY	GOBP_REGULATION_OF_PODOSOME_ASSEMBLY		9	-0.896306	-1.99098	0	0.00871893	0.218	225	tags=56%, list=3%, signal=57%
GOMF_CYTOKINE_RECEPTOR_ACTIVITY	GOMF_CYTOKINE_RECEPTOR_ACTIVITY		32	-0.657758	-1.99276	0	0.00876685	0.213	346	tags=31%, list=5%, signal=33%
GOBP_PROTEIN_LOCALIZATION_TO_CENP_A_CONTAINING_CHROMATIN	GOBP_PROTEIN_LOCALIZATION_TO_CENP_A_CONTAINING_CHROMATIN		12	-0.817727	-1.97459	0	0.0109578	0.298	1057	tags=92%, list=15%, signal=108%
GOBP_KINETOCHORE_ORGANIZATION	GOBP_KINETOCHORE_ORGANIZATION		20	-0.722096	-1.96932	0	0.0114317	0.325	1110	tags=65%, list=16%, signal=77%
GOBP_TYROSINE_PHOSPHORYLATION_OF_STAT_PROTEIN	GOBP_TYROSINE_PHOSPHORYLATION_OF_STAT_PROTEIN		34	-0.65006	-1.96829	0	0.0115121	0.333	225	tags=26%, list=3%, signal=27%
GOCC_CONDENSED_NUCLEAR_CHROMOSOME	GOCC_CONDENSED_NUCLEAR_CHROMOSOME		40	-0.629542	-1.97023	0	0.0116339	0.323	866	tags=48%, list=12%, signal=54%
GOBP_POSITIVE_REGULATION_OF_CYTOKINESIS	GOBP_POSITIVE_REGULATION_OF_CYTOKINESIS		28	-0.67932	-1.96434	0	0.0116925	0.352	1005	tags=50%, list=14%, signal=58%
GOCC_CHROMOSOME_CENTROMERIC_CORE_DOMAIN	GOCC_CHROMOSOME_CENTROMERIC_CORE_DOMAIN		13	-0.809414	-1.96387	0	0.0117136	0.359	1057	tags=85%, list=15%, signal=99%
GOBP_AMINO_ACID_BIOSYNTHETIC_PROCESS	GOBP_AMINO_ACID_BIOSYNTHETIC_PROCESS		39	-0.620662	-1.96566	0	0.0117242	0.347	1595	tags=59%, list=23%, signal=76%
GOBP_PYRIMIDINE_CONTAINING_COMPOUND_BIOSYNTHETIC_PROCESS	GOBP_PYRIMIDINE_CONTAINING_COMPOUND_BIOSYNTHETIC_PROCESS		25	-0.677631	-1.96259	0	0.0117324	0.364	1096	tags=52%, list=16%, signal=61%
GOBP_MITOTIC_SPINDLE_ASSEMBLY	GOBP_MITOTIC_SPINDLE_ASSEMBLY		55	-0.579412	-1.95465	0	0.0128049	0.398	443	tags=27%, list=6%, signal=29%
GOBP_REGULATION_OF_CYTOKINESIS	GOBP_REGULATION_OF_CYTOKINESIS		53	-0.576255	-1.95629	0	0.0128848	0.391	808	tags=34%, list=12%, signal=38%
GOMF_MHC_CLASS_II_PROTEIN_COMPLEX_BINDING	GOMF_MHC_CLASS_II_PROTEIN_COMPLEX_BINDING		21	-0.72195	-1.9451	0	0.0141825	0.446	1195	tags=67%, list=17%, signal=80%
GOMF_GROWTH_FACTOR_ACTIVITY	GOMF_GROWTH_FACTOR_ACTIVITY		24	-0.703069	-1.94666	0	0.014244	0.437	261	tags=29%, list=4%, signal=30%
GOBP_MITOTIC_METAPHASE_CHROMOSOME_ALIGNMENT	GOBP_MITOTIC_METAPHASE_CHROMOSOME_ALIGNMENT		51	-0.589626	-1.93904	0	0.0147557	0.484	1230	tags=45%, list=18%, signal=54%
GOBP_NUCLEOSIDE_MONOPHOSPHATE_METABOLIC_PROCESS	GOBP_NUCLEOSIDE_MONOPHOSPHATE_METABOLIC_PROCESS		47	-0.595066	-1.94011	0	0.0148244	0.479	1108	tags=43%, list=16%, signal=50%
GOMF_CYTOKINE_RECEPTOR_BINDING	GOMF_CYTOKINE_RECEPTOR_BINDING		97	-0.522397	-1.94036	0	0.0150733	0.477	810	tags=33%, list=12%, signal=37%
GOBP_RECEPTOR_SIGNALING_PATHWAY_VIA_STAT	GOBP_RECEPTOR_SIGNALING_PATHWAY_VIA_STAT		81	-0.531863	-1.93464	0	0.0155608	0.514	225	tags=17%, list=3%, signal=18%
GOBP_POSITIVE_REGULATION_OF_CHROMOSOME_SEGREGATION	GOBP_POSITIVE_REGULATION_OF_CHROMOSOME_SEGREGATION		25	-0.673106	-1.93355	0	0.0156431	0.522	808	tags=52%, list=12%, signal=59%
GOBP_POSITIVE_REGULATION_OF_TYROSINE_PHOSPHORYLATION_OF_STAT_PROTEIN	GOBP_POSITIVE_REGULATION_OF_TYROSINE_PHOSPHORYLATION_OF_STAT_PROTEIN		24	-0.672993	-1.92504	0.00185874	0.0180648	0.585	225	tags=33%, list=3%, signal=34%
GOMF_TUMOR_NECROSIS_FACTOR_RECEPTOR_SUPERFAMILY_BINDING	GOMF_TUMOR_NECROSIS_FACTOR_RECEPTOR_SUPERFAMILY_BINDING		30	-0.64183	-1.92219	0.00190114	0.0187206	0.607	1059	tags=50%, list=15%, signal=59%
GOBP_PROTEIN_LOCALIZATION_TO_CHROMOSOME	GOBP_PROTEIN_LOCALIZATION_TO_CHROMOSOME		91	-0.522307	-1.91989	0	0.0190088	0.619	1666	tags=54%, list=24%, signal=70%
GOBP_NEGATIVE_REGULATION_OF_REPRODUCTIVE_PROCESS	GOBP_NEGATIVE_REGULATION_OF_REPRODUCTIVE_PROCESS		22	-0.685381	-1.914	0	0.0203856	0.659	669	tags=36%, list=10%, signal=40%
GOBP_MITOTIC_SPINDLE_ELONGATION	GOBP_MITOTIC_SPINDLE_ELONGATION		9	-0.854851	-1.90719	0	0.0218538	0.702	808	tags=89%, list=12%, signal=100%
GOBP_INCLUSION_BODY_ASSEMBLY	GOBP_INCLUSION_BODY_ASSEMBLY		15	-0.739195	-1.90835	0.00194175	0.022171	0.694	282	tags=27%, list=4%, signal=28%
GOCC_KINESIN_COMPLEX	GOCC_KINESIN_COMPLEX		25	-0.656652	-1.90726	0.00187266	0.0222189	0.702	508	tags=40%, list=7%, signal=43%
GOBP_POSITIVE_REGULATION_OF_MITOTIC_CELL_CYCLE_PHASE_TRANSITION	GOBP_POSITIVE_REGULATION_OF_MITOTIC_CELL_CYCLE_PHASE_TRANSITION		57	-0.555784	-1.89631	0	0.0257933	0.766	1085	tags=39%, list=15%, signal=45%
GOBP_POSITIVE_REGULATION_OF_MITOTIC_CELL_CYCLE_SPINDLE_ASSEMBLY_CHECKPOINT	GOBP_POSITIVE_REGULATION_OF_MITOTIC_CELL_CYCLE_SPINDLE_ASSEMBLY_CHECKPOINT		11	-0.792422	-1.89498	0.00199203	0.0260574	0.774	808	tags=64%, list=12%, signal=72%
GOBP_MEIOTIC_CELL_CYCLE_PROCESS	GOBP_MEIOTIC_CELL_CYCLE_PROCESS		92	-0.507001	-1.89321	0	0.0263299	0.786	770	tags=36%, list=11%, signal=40%
GOCC_ORGANELLAR_RIBOSOME	GOCC_ORGANELLAR_RIBOSOME		83	-0.52832	-1.88582	0	0.0267927	0.817	2318	tags=75%, list=33%, signal=110%
GOBP_MYELOID_DENDRITIC_CELL_DIFFERENTIATION	GOBP_MYELOID_DENDRITIC_CELL_DIFFERENTIATION		11	-0.811243	-1.88647	0	0.0268831	0.813	339	tags=36%, list=5%, signal=38%
GOBP_POSITIVE_REGULATION_OF_CELL_CYCLE_CHECKPOINT	GOBP_POSITIVE_REGULATION_OF_CELL_CYCLE_CHECKPOINT		14	-0.747654	-1.88713	0.00378072	0.0270722	0.811	808	tags=57%, list=12%, signal=64%
GOMF_ELECTRON_TRANSFER_ACTIVITY	GOMF_ELECTRON_TRANSFER_ACTIVITY		86	-0.5229	-1.88884	0	0.0272408	0.805	2216	tags=51%, list=32%, signal=74%
GOBP_REGULATION_OF_CELL_DIVISION	GOBP_REGULATION_OF_CELL_DIVISION		81	-0.517247	-1.88762	0	0.0273173	0.809	609	tags=28%, list=9%, signal=31%
GOBP_MONOCYTE_DIFFERENTIATION	GOBP_MONOCYTE_DIFFERENTIATION		22	-0.68135	-1.88888	0	0.0276633	0.804	978	tags=45%, list=14%, signal=53%
GOBP_REGULATION_OF_IMMUNOGLOBULIN_PRODUCTION	GOBP_REGULATION_OF_IMMUNOGLOBULIN_PRODUCTION		47	-0.566709	-1.8815	0	0.0285054	0.837	574	tags=26%, list=8%, signal=28%
GOBP_POSITIVE_REGULATION_OF_MITOTIC_CELL_CYCLE	GOBP_POSITIVE_REGULATION_OF_MITOTIC_CELL_CYCLE		74	-0.529074	-1.87882	0	0.028896	0.847	1170	tags=35%, list=17%, signal=42%
GOBP_PROTEIN_LOCALIZATION_TO_CHROMATIN	GOBP_PROTEIN_LOCALIZATION_TO_CHROMATIN		40	-0.596563	-1.87938	0.00185185	0.0289984	0.846	1057	tags=50%, list=15%, signal=59%
GOBP_CENP_A_CONTAINING_CHROMATIN_ASSEMBLY	GOBP_CENP_A_CONTAINING_CHROMATIN_ASSEMBLY		10	-0.808084	-1.87585	0	0.0292504	0.857	1220	tags=90%, list=17%, signal=109%
GOBP_MITOTIC_CYTOKINESIS	GOBP_MITOTIC_CYTOKINESIS		64	-0.539687	-1.87585	0.00184843	0.0296623	0.857	897	tags=33%, list=13%, signal=37%
GOCC_MITOTIC_SPINDLE_MIDZONE	GOCC_MITOTIC_SPINDLE_MIDZONE		9	-0.840481	-1.87266	0	0.0302703	0.867	508	tags=56%, list=7%, signal=60%
GOBP_POSITIVE_REGULATION_OF_NUCLEAR_DIVISION	GOBP_POSITIVE_REGULATION_OF_NUCLEAR_DIVISION		22	-0.669324	-1.87059	0	0.0307887	0.874	770	tags=45%, list=11%, signal=51%
GOCC_MHC_CLASS_II_PROTEIN_COMPLEX	GOCC_MHC_CLASS_II_PROTEIN_COMPLEX		13	-0.763524	-1.86879	0.00375235	0.0313182	0.877	978	tags=69%, list=14%, signal=80%
GOMF_DNA_POLYMERASE_BINDING	GOMF_DNA_POLYMERASE_BINDING		17	-0.71129	-1.86511	0.00191205	0.0318871	0.889	1476	tags=76%, list=21%, signal=97%
GOBP_REGULATION_OF_CELL_CYCLE_G2_M_PHASE_TRANSITION	GOBP_REGULATION_OF_CELL_CYCLE_G2_M_PHASE_TRANSITION		76	-0.527875	-1.86657	0	0.0319327	0.883	1452	tags=46%, list=21%, signal=57%
GOBP_MEIOTIC_CHROMOSOME_SEGREGATION	GOBP_MEIOTIC_CHROMOSOME_SEGREGATION		44	-0.577704	-1.86425	0.00362976	0.0320748	0.892	708	tags=39%, list=10%, signal=43%
GOBP_CHAPERONE_MEDIATED_PROTEIN_COMPLEX_ASSEMBLY	GOBP_CHAPERONE_MEDIATED_PROTEIN_COMPLEX_ASSEMBLY		16	-0.718866	-1.86555	0.00188324	0.0320982	0.889	1195	tags=56%, list=17%, signal=68%
GOBP_REGULATION_OF_MITOTIC_CELL_CYCLE_SPINDLE_ASSEMBLY_CHECKPOINT	GOBP_REGULATION_OF_MITOTIC_CELL_CYCLE_SPINDLE_ASSEMBLY_CHECKPOINT		17	-0.707399	-1.8618	0.00190476	0.0328959	0.898	1142	tags=53%, list=16%, signal=63%
GOBP_REGULATION_OF_UBIQUITIN_PROTEIN_LIGASE_ACTIVITY	GOBP_REGULATION_OF_UBIQUITIN_PROTEIN_LIGASE_ACTIVITY		15	-0.744327	-1.85964	0.00182815	0.0337523	0.911	528	tags=40%, list=8%, signal=43%
GOBP_REGULATION_OF_ATTACHMENT_OF_SPINDLE_MICROTUBULES_TO_KINETOCHORE	GOBP_REGULATION_OF_ATTACHMENT_OF_SPINDLE_MICROTUBULES_TO_KINETOCHORE		19	-0.689327	-1.85697	0.00382409	0.0344661	0.917	925	tags=58%, list=13%, signal=67%
GOBP_POSITIVE_REGULATION_OF_RELEASE_OF_SEQUESTERED_CALCIUM_ION_INTO_CYTOSOL	GOBP_POSITIVE_REGULATION_OF_RELEASE_OF_SEQUESTERED_CALCIUM_ION_INTO_CYTOSOL		15	-0.735313	-1.8573	0	0.0346711	0.917	71	tags=27%, list=1%, signal=27%
GOBP_ALPHA_AMINO_ACID_CATABOLIC_PROCESS	GOBP_ALPHA_AMINO_ACID_CATABOLIC_PROCESS		27	-0.635309	-1.84971	0.00189036	0.0377852	0.945	1254	tags=48%, list=18%, signal=58%
GOCC_ANAPHASE_PROMOTING_COMPLEX	GOCC_ANAPHASE_PROMOTING_COMPLEX		15	-0.729083	-1.84803	0.00595238	0.0382948	0.947	331	tags=27%, list=5%, signal=28%
GOBP_SPINDLE_MIDZONE_ASSEMBLY	GOBP_SPINDLE_MIDZONE_ASSEMBLY		10	-0.801332	-1.84535	0.00186916	0.0386639	0.955	808	tags=80%, list=12%, signal=90%
GOBP_NUCLEOSOME_ORGANIZATION	GOBP_NUCLEOSOME_ORGANIZATION		88	-0.50259	-1.84579	0.00178253	0.0387632	0.954	1474	tags=43%, list=21%, signal=54%
GOBP_MITOTIC_CHROMOSOME_CONDENSATION	GOBP_MITOTIC_CHROMOSOME_CONDENSATION		18	-0.698618	-1.84647	0.00188324	0.0387672	0.953	756	tags=56%, list=11%, signal=62%
GOBP_PEPTIDE_ANTIGEN_ASSEMBLY_WITH_MHC_CLASS_II_PROTEIN_COMPLEX	GOBP_PEPTIDE_ANTIGEN_ASSEMBLY_WITH_MHC_CLASS_II_PROTEIN_COMPLEX		12	-0.757187	-1.84283	0.00382409	0.0392025	0.958	978	tags=67%, list=14%, signal=77%
GOBP_PROTEIN_LOCALIZATION_TO_CONDENSED_CHROMOSOME	GOBP_PROTEIN_LOCALIZATION_TO_CONDENSED_CHROMOSOME		14	-0.733546	-1.84329	0.00571429	0.0393973	0.957	1416	tags=71%, list=20%, signal=89%
GOBP_DNA_STRAND_ELONGATION_INVOLVED_IN_DNA_REPLICATION	GOBP_DNA_STRAND_ELONGATION_INVOLVED_IN_DNA_REPLICATION		13	-0.751584	-1.84044	0.00389864	0.0402682	0.96	1563	tags=92%, list=22%, signal=119%
GOMF_CARBON_OXYGEN_LYASE_ACTIVITY	GOMF_CARBON_OXYGEN_LYASE_ACTIVITY		33	-0.602455	-1.83136	0.00182815	0.0455109	0.978	749	tags=30%, list=11%, signal=34%
GOCC_INNER_KINETOCHORE	GOCC_INNER_KINETOCHORE		17	-0.694589	-1.82696	0.00558659	0.0478527	0.984	1220	tags=71%, list=17%, signal=85%
GOBP_SPINDLE_ASSEMBLY	GOBP_SPINDLE_ASSEMBLY		100	-0.490122	-1.82699	0	0.0483336	0.984	897	tags=28%, list=13%, signal=32%
GOBP_REGULATION_OF_ACUTE_INFLAMMATORY_RESPONSE	GOBP_REGULATION_OF_ACUTE_INFLAMMATORY_RESPONSE		14	-0.72793	-1.82405	0.00402414	0.0484778	0.987	225	tags=36%, list=3%, signal=37%
GOBP_REGULATION_OF_CELL_CYCLE_CHECKPOINT	GOBP_REGULATION_OF_CELL_CYCLE_CHECKPOINT		36	-0.573503	-1.82445	0.00561798	0.0487119	0.986	864	tags=33%, list=12%, signal=38%
GOBP_PYRIMIDINE_NUCLEOSIDE_TRIPHOSPHATE_METABOLIC_PROCESS	GOBP_PYRIMIDINE_NUCLEOSIDE_TRIPHOSPHATE_METABOLIC_PROCESS		17	-0.710403	-1.8248	0.00184502	0.0488505	0.986	766	tags=53%, list=11%, signal=59%
GOBP_POSITIVE_REGULATION_OF_MITOTIC_SISTER_CHROMATID_SEPARATION	GOBP_POSITIVE_REGULATION_OF_MITOTIC_SISTER_CHROMATID_SEPARATION		14	-0.726061	-1.8227	0.00541516	0.049019	0.989	357	tags=43%, list=5%, signal=45%
GOBP_SERINE_FAMILY_AMINO_ACID_METABOLIC_PROCESS	GOBP_SERINE_FAMILY_AMINO_ACID_METABOLIC_PROCESS		17	-0.700688	-1.82168	0.00374532	0.0493422	0.99	1499	tags=82%, list=21%, signal=104%
GOBP_RESPONSE_TO_NICOTINE	GOBP_RESPONSE_TO_NICOTINE		14	-0.729496	-1.8207	0.00197239	0.0493785	0.99	225	tags=29%, list=3%, signal=29%

## Sheet: gsea_report_for_neg_NR.tsv
NAME	GS<br> follow link to MSigDB	GS DETAILS	SIZE	ES	NES	NOM p-val	FDR q-val	FWER p-val	RANK AT MAX	LEADING EDGE
GOBP_MITOCHONDRIAL_TRANSLATION	GOBP_MITOCHONDRIAL_TRANSLATION	Details ...	62	-0.686021	-3.06534	0	0	0	757	tags=81%, list=23%, signal=102%
GOCC_ORGANELLAR_RIBOSOME	GOCC_ORGANELLAR_RIBOSOME	Details ...	53	-0.689922	-2.96591	0	0	0	729	tags=81%, list=22%, signal=102%
GOBP_ATP_SYNTHESIS_COUPLED_ELECTRON_TRANSPORT	GOBP_ATP_SYNTHESIS_COUPLED_ELECTRON_TRANSPORT	Details ...	77	-0.639133	-2.95873	0	0	0	1016	tags=74%, list=30%, signal=104%
GOBP_NUCLEOSIDE_TRIPHOSPHATE_BIOSYNTHETIC_PROCESS	GOBP_NUCLEOSIDE_TRIPHOSPHATE_BIOSYNTHETIC_PROCESS	Details ...	78	-0.650381	-2.93962	0	0	0	857	tags=68%, list=26%, signal=89%
GOBP_MITOCHONDRIAL_GENE_EXPRESSION	GOBP_MITOCHONDRIAL_GENE_EXPRESSION	Details ...	65	-0.682152	-2.92738	0	0	0	757	tags=80%, list=23%, signal=101%
GOCC_RESPIRASOME	GOCC_RESPIRASOME	Details ...	75	-0.6369	-2.89222	0	0	0	1016	tags=77%, list=30%, signal=109%
GOBP_ATP_BIOSYNTHETIC_PROCESS	GOBP_ATP_BIOSYNTHETIC_PROCESS	Details ...	71	-0.640319	-2.87093	0	0	0	969	tags=72%, list=29%, signal=99%
GOMF_OXIDOREDUCTION_DRIVEN_ACTIVE_TRANSMEMBRANE_TRANSPORTER_ACTIVITY	GOMF_OXIDOREDUCTION_DRIVEN_ACTIVE_TRANSMEMBRANE_TRANSPORTER_ACTIVITY	Details ...	54	-0.666516	-2.8477	0	0	0	1006	tags=83%, list=30%, signal=117%
GOBP_ATP_METABOLIC_PROCESS	GOBP_ATP_METABOLIC_PROCESS	Details ...	80	-0.606736	-2.83322	0	0	0	969	tags=69%, list=29%, signal=95%
GOBP_PROTON_MOTIVE_FORCE_DRIVEN_ATP_SYNTHESIS	GOBP_PROTON_MOTIVE_FORCE_DRIVEN_ATP_SYNTHESIS	Details ...	65	-0.656673	-2.83172	0	0	0	969	tags=75%, list=29%, signal=104%
GOBP_NUCLEOSIDE_TRIPHOSPHATE_METABOLIC_PROCESS	GOBP_NUCLEOSIDE_TRIPHOSPHATE_METABOLIC_PROCESS	Details ...	97	-0.598468	-2.78026	0	0	0	1078	tags=73%, list=32%, signal=105%
GOCC_LARGE_RIBOSOMAL_SUBUNIT	GOCC_LARGE_RIBOSOMAL_SUBUNIT	Details ...	87	-0.581539	-2.73137	0	0	0	898	tags=63%, list=27%, signal=84%
GOCC_NADH_DEHYDROGENASE_COMPLEX	GOCC_NADH_DEHYDROGENASE_COMPLEX	Details ...	41	-0.66872	-2.64364	0	0	0	857	tags=78%, list=26%, signal=104%
GOBP_PROTON_TRANSMEMBRANE_TRANSPORT	GOBP_PROTON_TRANSMEMBRANE_TRANSPORT	Details ...	60	-0.598184	-2.63944	0	0	0	1064	tags=70%, list=32%, signal=101%
GOMF_ELECTRON_TRANSFER_ACTIVITY	GOMF_ELECTRON_TRANSFER_ACTIVITY	Details ...	69	-0.606804	-2.63035	0	0	0	1016	tags=77%, list=30%, signal=108%
GOMF_OXIDOREDUCTASE_ACTIVITY_ACTING_ON_NAD_P_H_QUINONE_OR_SIMILAR_COMPOUND_AS_ACCEPTOR	GOMF_OXIDOREDUCTASE_ACTIVITY_ACTING_ON_NAD_P_H_QUINONE_OR_SIMILAR_COMPOUND_AS_ACCEPTOR	Details ...	38	-0.660656	-2.5864	0	0	0	857	tags=76%, list=26%, signal=101%
GOBP_MITOCHONDRIAL_ELECTRON_TRANSPORT_NADH_TO_UBIQUINONE	GOBP_MITOCHONDRIAL_ELECTRON_TRANSPORT_NADH_TO_UBIQUINONE	Details ...	40	-0.634217	-2.54789	0	0	0	969	tags=75%, list=29%, signal=104%
GOBP_RIBOSOMAL_LARGE_SUBUNIT_BIOGENESIS	GOBP_RIBOSOMAL_LARGE_SUBUNIT_BIOGENESIS	Details ...	38	-0.669041	-2.53564	0	0	0	786	tags=66%, list=24%, signal=85%
GOMF_PROTON_TRANSMEMBRANE_TRANSPORTER_ACTIVITY	GOMF_PROTON_TRANSMEMBRANE_TRANSPORTER_ACTIVITY	Details ...	45	-0.612236	-2.53446	0	0	0	1006	tags=71%, list=30%, signal=100%
GOBP_NADH_DEHYDROGENASE_COMPLEX_ASSEMBLY	GOBP_NADH_DEHYDROGENASE_COMPLEX_ASSEMBLY	Details ...	39	-0.661292	-2.51303	0	0	0	857	tags=77%, list=26%, signal=102%
GOCC_MITOCHONDRIAL_LARGE_RIBOSOMAL_SUBUNIT	GOCC_MITOCHONDRIAL_LARGE_RIBOSOMAL_SUBUNIT		33	-0.685338	-2.51276	0	0	0	729	tags=82%, list=22%, signal=104%
GOBP_MITOCHONDRIAL_RESPIRATORY_CHAIN_COMPLEX_ASSEMBLY	GOBP_MITOCHONDRIAL_RESPIRATORY_CHAIN_COMPLEX_ASSEMBLY		51	-0.636011	-2.50601	0	0	0	969	tags=76%, list=29%, signal=106%
GOMF_NAD_P_H_DEHYDROGENASE_QUINONE_ACTIVITY	GOMF_NAD_P_H_DEHYDROGENASE_QUINONE_ACTIVITY		37	-0.658427	-2.50447	0	0	0	969	tags=81%, list=29%, signal=113%
GOBP_RESPIRATORY_ELECTRON_TRANSPORT_CHAIN	GOBP_RESPIRATORY_ELECTRON_TRANSPORT_CHAIN		82	-0.561087	-2.49294	0	0	0	1016	tags=71%, list=30%, signal=99%
GOCC_SMALL_RIBOSOMAL_SUBUNIT	GOCC_SMALL_RIBOSOMAL_SUBUNIT		58	-0.571842	-2.45638	0	0	0	1163	tags=81%, list=35%, signal=122%
GOMF_RRNA_BINDING	GOMF_RRNA_BINDING		35	-0.643622	-2.40852	0	3.92441e-05	0.001	827	tags=71%, list=25%, signal=94%
GOBP_ELECTRON_TRANSPORT_CHAIN	GOBP_ELECTRON_TRANSPORT_CHAIN		90	-0.533582	-2.42729	0	4.07535e-05	0.001	1016	tags=69%, list=30%, signal=96%
GOCC_PRERIBOSOME	GOCC_PRERIBOSOME		45	-0.558588	-2.29964	0	0.000629797	0.017	1081	tags=73%, list=32%, signal=107%
GOCC_CYTOCHROME_COMPLEX	GOCC_CYTOCHROME_COMPLEX		26	-0.664488	-2.29273	0	0.000681941	0.019	1016	tags=85%, list=30%, signal=121%
GOMF_OXIDOREDUCTASE_ACTIVITY_ACTING_ON_NAD_P_H	GOMF_OXIDOREDUCTASE_ACTIVITY_ACTING_ON_NAD_P_H		42	-0.58059	-2.28385	0	0.000764962	0.022	969	tags=79%, list=29%, signal=109%
GOCC_PROTEIN_FOLDING_CHAPERONE_COMPLEX	GOCC_PROTEIN_FOLDING_CHAPERONE_COMPLEX		26	-0.639642	-2.27337	0	0.000842801	0.025	704	tags=65%, list=21%, signal=82%
GOCC_CYTOSOLIC_LARGE_RIBOSOMAL_SUBUNIT	GOCC_CYTOSOLIC_LARGE_RIBOSOMAL_SUBUNIT		53	-0.527281	-2.2208	0	0.00169667	0.052	1183	tags=68%, list=35%, signal=103%
GOCC_METHYLOSOME	GOCC_METHYLOSOME		11	-0.805669	-2.21613	0	0.00173977	0.055	609	tags=91%, list=18%, signal=111%
GOCC_OXIDOREDUCTASE_COMPLEX	GOCC_OXIDOREDUCTASE_COMPLEX		75	-0.509055	-2.20908	0	0.00185283	0.061	876	tags=65%, list=26%, signal=87%
GOCC_MITOCHONDRIAL_SMALL_RIBOSOMAL_SUBUNIT	GOCC_MITOCHONDRIAL_SMALL_RIBOSOMAL_SUBUNIT		19	-0.689199	-2.20558	0	0.00185934	0.063	818	tags=84%, list=24%, signal=111%
GOBP_PROTEIN_INSERTION_INTO_MEMBRANE	GOBP_PROTEIN_INSERTION_INTO_MEMBRANE		33	-0.606769	-2.20946	0	0.00190733	0.061	607	tags=48%, list=18%, signal=59%
GOCC_RESPIRATORY_CHAIN_COMPLEX_IV	GOCC_RESPIRATORY_CHAIN_COMPLEX_IV		18	-0.673526	-2.2012	0	0.00197511	0.066	1006	tags=83%, list=30%, signal=119%
GOCC_CYTOSOLIC_RIBOSOME	GOCC_CYTOSOLIC_RIBOSOME		97	-0.474157	-2.19421	0	0.00214316	0.073	1217	tags=69%, list=36%, signal=105%
GOBP_PROTEIN_FOLDING	GOBP_PROTEIN_FOLDING		92	-0.463511	-2.19118	0	0.00219792	0.077	792	tags=47%, list=24%, signal=60%
GOCC_PROTEASOME_ACCESSORY_COMPLEX	GOCC_PROTEASOME_ACCESSORY_COMPLEX		21	-0.650818	-2.18683	0	0.00222048	0.08	1100	tags=90%, list=33%, signal=134%
GOBP_RRNA_METABOLIC_PROCESS	GOBP_RRNA_METABOLIC_PROCESS		90	-0.459987	-2.17064	0	0.00283337	0.104	825	tags=53%, list=25%, signal=69%
GOBP_STEROL_METABOLIC_PROCESS	GOBP_STEROL_METABOLIC_PROCESS		21	-0.653701	-2.16864	0	0.00284117	0.105	644	tags=57%, list=19%, signal=70%
GOBP_RIBOSOMAL_SMALL_SUBUNIT_BIOGENESIS	GOBP_RIBOSOMAL_SMALL_SUBUNIT_BIOGENESIS		45	-0.529274	-2.15398	0	0.0035511	0.134	1149	tags=76%, list=34%, signal=114%
GOBP_ESTABLISHMENT_OF_PROTEIN_LOCALIZATION_TO_MITOCHONDRIAL_MEMBRANE	GOBP_ESTABLISHMENT_OF_PROTEIN_LOCALIZATION_TO_MITOCHONDRIAL_MEMBRANE		22	-0.625779	-2.14607	0	0.00370714	0.144	607	tags=59%, list=18%, signal=72%
GOBP_DETOXIFICATION	GOBP_DETOXIFICATION		35	-0.546393	-2.13723	0	0.00393307	0.154	530	tags=46%, list=16%, signal=54%
GOCC_PROTEASOME_REGULATORY_PARTICLE	GOCC_PROTEASOME_REGULATORY_PARTICLE		19	-0.653461	-2.11473	0	0.00532058	0.204	1100	tags=95%, list=33%, signal=140%
GOMF_PRIMARY_ACTIVE_TRANSMEMBRANE_TRANSPORTER_ACTIVITY	GOMF_PRIMARY_ACTIVE_TRANSMEMBRANE_TRANSPORTER_ACTIVITY		74	-0.496324	-2.10661	0	0.00568825	0.221	868	tags=59%, list=26%, signal=79%
GOCC_PROTON_TRANSPORTING_ATP_SYNTHASE_COMPLEX	GOCC_PROTON_TRANSPORTING_ATP_SYNTHASE_COMPLEX		19	-0.648403	-2.10756	0.003861	0.00574043	0.22	959	tags=74%, list=29%, signal=103%
GOBP_UNSATURATED_FATTY_ACID_BIOSYNTHETIC_PROCESS	GOBP_UNSATURATED_FATTY_ACID_BIOSYNTHETIC_PROCESS		10	-0.803614	-2.08891	0	0.00579097	0.266	171	tags=40%, list=5%, signal=42%
GOCC_SPLICEOSOMAL_SNRNP_COMPLEX	GOCC_SPLICEOSOMAL_SNRNP_COMPLEX		47	-0.495681	-2.09131	0	0.0058661	0.262	886	tags=55%, list=27%, signal=74%
GOMF_UNFOLDED_PROTEIN_BINDING	GOMF_UNFOLDED_PROTEIN_BINDING		50	-0.5131	-2.10215	0	0.00587369	0.235	761	tags=54%, list=23%, signal=69%
GOCC_SMALL_SUBUNIT_PROCESSOME	GOCC_SMALL_SUBUNIT_PROCESSOME		33	-0.554656	-2.08914	0	0.00587406	0.265	1214	tags=79%, list=36%, signal=123%
GOBP_MITOCHONDRIAL_ELECTRON_TRANSPORT_CYTOCHROME_C_TO_OXYGEN	GOBP_MITOCHONDRIAL_ELECTRON_TRANSPORT_CYTOCHROME_C_TO_OXYGEN		16	-0.692143	-2.09213	0	0.0059349	0.261	1006	tags=88%, list=30%, signal=125%
GOMF_ATP_DEPENDENT_PROTEIN_FOLDING_CHAPERONE	GOMF_ATP_DEPENDENT_PROTEIN_FOLDING_CHAPERONE		20	-0.633471	-2.08611	0	0.00599344	0.28	761	tags=65%, list=23%, signal=84%
GOBP_REGULATION_OF_PROTEIN_LOCALIZATION_TO_CHROMOSOME_TELOMERIC_REGION	GOBP_REGULATION_OF_PROTEIN_LOCALIZATION_TO_CHROMOSOME_TELOMERIC_REGION		10	-0.793817	-2.09893	0	0.00600677	0.244	698	tags=100%, list=21%, signal=126%
GOBP_POSITIVE_REGULATION_OF_TELOMERASE_RNA_LOCALIZATION_TO_CAJAL_BODY	GOBP_POSITIVE_REGULATION_OF_TELOMERASE_RNA_LOCALIZATION_TO_CAJAL_BODY		13	-0.728775	-2.09216	0	0.00604481	0.261	698	tags=85%, list=21%, signal=107%
GOMF_GROWTH_FACTOR_ACTIVITY	GOMF_GROWTH_FACTOR_ACTIVITY		13	-0.721208	-2.09326	0	0.00611846	0.259	161	tags=38%, list=5%, signal=40%
GOMF_PEROXIREDOXIN_ACTIVITY	GOMF_PEROXIREDOXIN_ACTIVITY		8	-0.828793	-2.09501	0.00318471	0.00615453	0.256	84	tags=38%, list=3%, signal=38%
GOCC_SPLICEOSOMAL_TRI_SNRNP_COMPLEX	GOCC_SPLICEOSOMAL_TRI_SNRNP_COMPLEX		27	-0.587445	-2.09516	0	0.00627521	0.256	609	tags=59%, list=18%, signal=72%
GOCC_PROTON_TRANSPORTING_TWO_SECTOR_ATPASE_COMPLEX	GOCC_PROTON_TRANSPORTING_TWO_SECTOR_ATPASE_COMPLEX		29	-0.580794	-2.08031	0	0.00641579	0.304	959	tags=59%, list=29%, signal=81%
GOCC_U1_SNRNP	GOCC_U1_SNRNP		15	-0.666997	-2.0604	0	0.00849342	0.388	845	tags=73%, list=25%, signal=98%
GOMF_ACTIVE_TRANSMEMBRANE_TRANSPORTER_ACTIVITY	GOMF_ACTIVE_TRANSMEMBRANE_TRANSPORTER_ACTIVITY		88	-0.435588	-2.0561	0	0.00889094	0.413	881	tags=57%, list=26%, signal=75%
GOBP_ESTABLISHMENT_OF_PROTEIN_LOCALIZATION_TO_TELOMERE	GOBP_ESTABLISHMENT_OF_PROTEIN_LOCALIZATION_TO_TELOMERE		10	-0.767707	-2.05656	0.00341297	0.00900043	0.412	785	tags=100%, list=23%, signal=130%
GOMF_TRANSFERASE_ACTIVITY_TRANSFERRING_ALKYL_OR_ARYL_OTHER_THAN_METHYL_GROUPS	GOMF_TRANSFERASE_ACTIVITY_TRANSFERRING_ALKYL_OR_ARYL_OTHER_THAN_METHYL_GROUPS		14	-0.687701	-2.0522	0	0.00914484	0.423	952	tags=79%, list=28%, signal=109%
GOCC_PROTON_TRANSPORTING_TWO_SECTOR_ATPASE_COMPLEX_PROTON_TRANSPORTING_DOMAIN	GOCC_PROTON_TRANSPORTING_TWO_SECTOR_ATPASE_COMPLEX_PROTON_TRANSPORTING_DOMAIN		20	-0.615467	-2.04509	0	0.00976095	0.446	658	tags=50%, list=20%, signal=62%
GOMF_PROTEIN_FOLDING_CHAPERONE	GOMF_PROTEIN_FOLDING_CHAPERONE		33	-0.530622	-2.03772	0	0.0103764	0.476	536	tags=45%, list=16%, signal=54%
GOBP_PROTEIN_LOCALIZATION_TO_NUCLEAR_BODY	GOBP_PROTEIN_LOCALIZATION_TO_NUCLEAR_BODY		9	-0.793579	-2.03779	0	0.0105176	0.475	698	tags=100%, list=21%, signal=126%
GOCC_OUTER_MITOCHONDRIAL_MEMBRANE_PROTEIN_COMPLEX	GOCC_OUTER_MITOCHONDRIAL_MEMBRANE_PROTEIN_COMPLEX		13	-0.721602	-2.03167	0	0.0109236	0.504	528	tags=62%, list=16%, signal=73%
GOBP_STEROL_BIOSYNTHETIC_PROCESS	GOBP_STEROL_BIOSYNTHETIC_PROCESS		15	-0.674262	-2.03212	0	0.0110075	0.503	644	tags=67%, list=19%, signal=82%
GOBP_PROTEIN_LOCALIZATION_TO_NUCLEOPLASM	GOBP_PROTEIN_LOCALIZATION_TO_NUCLEOPLASM		11	-0.730167	-2.02521	0	0.0116947	0.535	698	tags=82%, list=21%, signal=103%
GOBP_SPLICEOSOMAL_SNRNP_ASSEMBLY	GOBP_SPLICEOSOMAL_SNRNP_ASSEMBLY		19	-0.634481	-2.01726	0	0.0129284	0.575	609	tags=63%, list=18%, signal=77%
GOCC_U2_TYPE_SPLICEOSOMAL_COMPLEX	GOCC_U2_TYPE_SPLICEOSOMAL_COMPLEX		54	-0.492354	-2.00726	0	0.0141621	0.619	845	tags=50%, list=25%, signal=66%
GOBP_POSITIVE_REGULATION_OF_ESTABLISHMENT_OF_PROTEIN_LOCALIZATION_TO_TELOMERE	GOBP_POSITIVE_REGULATION_OF_ESTABLISHMENT_OF_PROTEIN_LOCALIZATION_TO_TELOMERE		9	-0.793579	-2.00583	0	0.0142095	0.625	698	tags=100%, list=21%, signal=126%
GOCC_U12_TYPE_SPLICEOSOMAL_COMPLEX	GOCC_U12_TYPE_SPLICEOSOMAL_COMPLEX		19	-0.600828	-2.00784	0	0.0142702	0.616	830	tags=63%, list=25%, signal=84%
GOBP_PYRIMIDINE_NUCLEOSIDE_TRIPHOSPHATE_METABOLIC_PROCESS	GOBP_PYRIMIDINE_NUCLEOSIDE_TRIPHOSPHATE_METABOLIC_PROCESS		7	-0.827396	-2.00297	0	0.0145501	0.639	408	tags=86%, list=12%, signal=97%
GOBP_CHAPERONE_MEDIATED_PROTEIN_FOLDING	GOBP_CHAPERONE_MEDIATED_PROTEIN_FOLDING		40	-0.520115	-1.99227	0	0.0165797	0.687	758	tags=50%, list=23%, signal=64%
GOBP_OUTER_MITOCHONDRIAL_MEMBRANE_ORGANIZATION	GOBP_OUTER_MITOCHONDRIAL_MEMBRANE_ORGANIZATION		12	-0.722028	-1.98957	0.00348432	0.0168839	0.698	528	tags=67%, list=16%, signal=79%
GOBP_CELL_REDOX_HOMEOSTASIS	GOBP_CELL_REDOX_HOMEOSTASIS		18	-0.628637	-1.98545	0	0.0176337	0.717	652	tags=50%, list=20%, signal=62%
GOMF_THIOREDOXIN_DEPENDENT_PEROXIREDOXIN_ACTIVITY	GOMF_THIOREDOXIN_DEPENDENT_PEROXIREDOXIN_ACTIVITY		6	-0.8694	-1.97781	0	0.0188732	0.746	84	tags=50%, list=3%, signal=51%
GOCC_CHAPERONIN_CONTAINING_T_COMPLEX	GOCC_CHAPERONIN_CONTAINING_T_COMPLEX		8	-0.793341	-1.97457	0	0.019464	0.761	698	tags=100%, list=21%, signal=126%
GOBP_MATURATION_OF_LSU_RRNA	GOBP_MATURATION_OF_LSU_RRNA		14	-0.677318	-1.9713	0.00373134	0.0198036	0.78	728	tags=71%, list=22%, signal=91%
GOCC_PRECATALYTIC_SPLICEOSOME	GOCC_PRECATALYTIC_SPLICEOSOME		37	-0.521685	-1.97211	0	0.0198671	0.774	845	tags=57%, list=25%, signal=75%
GOBP_TELOMERASE_RNA_LOCALIZATION	GOBP_TELOMERASE_RNA_LOCALIZATION		14	-0.665974	-1.96527	0.00327869	0.0204921	0.807	536	tags=71%, list=16%, signal=85%
GOCC_CYTOSOLIC_SMALL_RIBOSOMAL_SUBUNIT	GOCC_CYTOSOLIC_SMALL_RIBOSOMAL_SUBUNIT		37	-0.499136	-1.96737	0	0.0205743	0.8	1214	tags=76%, list=36%, signal=118%
GOBP_RNA_CAPPING	GOBP_RNA_CAPPING		11	-0.716725	-1.96573	0	0.0206384	0.805	609	tags=82%, list=18%, signal=100%
GOBP_DNA_TEMPLATED_DNA_REPLICATION	GOBP_DNA_TEMPLATED_DNA_REPLICATION		39	-0.509358	-1.96269	0	0.0210208	0.814	364	tags=38%, list=11%, signal=43%
GOMF_PROTON_TRANSPORTING_ATP_SYNTHASE_ACTIVITY_ROTATIONAL_MECHANISM	GOMF_PROTON_TRANSPORTING_ATP_SYNTHASE_ACTIVITY_ROTATIONAL_MECHANISM		15	-0.64374	-1.9604	0	0.0210524	0.823	1064	tags=73%, list=32%, signal=107%
GOMF_PROTON_CHANNEL_ACTIVITY	GOMF_PROTON_CHANNEL_ACTIVITY		15	-0.64374	-1.96084	0	0.0211269	0.821	1064	tags=73%, list=32%, signal=107%
GOBP_CELLULAR_RESPONSE_TO_TOXIC_SUBSTANCE	GOBP_CELLULAR_RESPONSE_TO_TOXIC_SUBSTANCE		30	-0.515272	-1.95733	0.00558659	0.0215228	0.831	530	tags=47%, list=16%, signal=55%
GOBP_NUCLEOSIDE_MONOPHOSPHATE_BIOSYNTHETIC_PROCESS	GOBP_NUCLEOSIDE_MONOPHOSPHATE_BIOSYNTHETIC_PROCESS		17	-0.629309	-1.9552	0	0.0218175	0.837	493	tags=53%, list=15%, signal=62%
GOBP_7_METHYLGUANOSINE_CAP_HYPERMETHYLATION	GOBP_7_METHYLGUANOSINE_CAP_HYPERMETHYLATION		7	-0.81979	-1.94431	0	0.0247327	0.874	609	tags=100%, list=18%, signal=122%
GOCC_SM_LIKE_PROTEIN_FAMILY_COMPLEX	GOCC_SM_LIKE_PROTEIN_FAMILY_COMPLEX		51	-0.458335	-1.94125	0	0.0253643	0.883	886	tags=53%, list=27%, signal=71%
GOBP_FATTY_ACID_BIOSYNTHETIC_PROCESS	GOBP_FATTY_ACID_BIOSYNTHETIC_PROCESS		26	-0.55041	-1.93312	0	0.0274841	0.91	301	tags=31%, list=9%, signal=34%
GOCC_PROTON_TRANSPORTING_ATP_SYNTHASE_COMPLEX_COUPLING_FACTOR_F_O	GOCC_PROTON_TRANSPORTING_ATP_SYNTHASE_COMPLEX_COUPLING_FACTOR_F_O		12	-0.684392	-1.92706	0	0.0293545	0.924	959	tags=83%, list=29%, signal=116%
GOMF_SNRNA_BINDING	GOMF_SNRNA_BINDING		23	-0.550791	-1.92391	0.00966184	0.0300073	0.934	845	tags=65%, list=25%, signal=87%
GOMF_OXIDOREDUCTASE_ACTIVITY_ACTING_ON_A_HEME_GROUP_OF_DONORS	GOMF_OXIDOREDUCTASE_ACTIVITY_ACTING_ON_A_HEME_GROUP_OF_DONORS		10	-0.697116	-1.91828	0	0.0317336	0.949	1006	tags=90%, list=30%, signal=128%
GOMF_SNORNA_BINDING	GOMF_SNORNA_BINDING		14	-0.63856	-1.91151	0.00334448	0.0339249	0.965	415	tags=50%, list=12%, signal=57%
GOMF_PHOSPHATASE_INHIBITOR_ACTIVITY	GOMF_PHOSPHATASE_INHIBITOR_ACTIVITY		14	-0.653845	-1.91021	0.00373134	0.0341001	0.966	43	tags=21%, list=1%, signal=22%
GOBP_MULTICELLULAR_ORGANISMAL_LEVEL_CHEMICAL_HOMEOSTASIS	GOBP_MULTICELLULAR_ORGANISMAL_LEVEL_CHEMICAL_HOMEOSTASIS		8	-0.765558	-1.90211	0.00879765	0.0366001	0.979	8	tags=25%, list=0%, signal=25%
GOBP_INNER_MITOCHONDRIAL_MEMBRANE_ORGANIZATION	GOBP_INNER_MITOCHONDRIAL_MEMBRANE_ORGANIZATION		15	-0.660767	-1.90264	0.00378788	0.0367365	0.979	607	tags=60%, list=18%, signal=73%
GOCC_SMN_SM_PROTEIN_COMPLEX	GOCC_SMN_SM_PROTEIN_COMPLEX		8	-0.786212	-1.90056	0.00887574	0.036932	0.982	609	tags=88%, list=18%, signal=107%
GOMF_INTRAMOLECULAR_OXIDOREDUCTASE_ACTIVITY_TRANSPOSING_C_C_BONDS	GOMF_INTRAMOLECULAR_OXIDOREDUCTASE_ACTIVITY_TRANSPOSING_C_C_BONDS		8	-0.766914	-1.89801	0.00283286	0.0371602	0.985	644	tags=75%, list=19%, signal=93%
GOBP_RIBOSOME_ASSEMBLY	GOBP_RIBOSOME_ASSEMBLY		34	-0.512677	-1.89849	0	0.037361	0.984	597	tags=38%, list=18%, signal=46%
GOMF_ISOMERASE_ACTIVITY	GOMF_ISOMERASE_ACTIVITY		47	-0.472881	-1.89289	0	0.0388109	0.988	787	tags=51%, list=24%, signal=66%
GOMF_METAL_CLUSTER_BINDING	GOMF_METAL_CLUSTER_BINDING		18	-0.610477	-1.88644	0	0.0412209	0.992	1040	tags=83%, list=31%, signal=120%
GOCC_90S_PRERIBOSOME	GOCC_90S_PRERIBOSOME		8	-0.755249	-1.88467	0	0.0415799	0.993	825	tags=100%, list=25%, signal=132%
GOBP_POSITIVE_REGULATION_OF_FIBROBLAST_PROLIFERATION	GOBP_POSITIVE_REGULATION_OF_FIBROBLAST_PROLIFERATION		16	-0.612143	-1.87956	0.013986	0.0434507	0.993	384	tags=50%, list=11%, signal=56%
GOCC_U2_TYPE_CATALYTIC_STEP_2_SPLICEOSOME	GOCC_U2_TYPE_CATALYTIC_STEP_2_SPLICEOSOME		18	-0.592431	-1.87606	0	0.0448843	0.995	609	tags=50%, list=18%, signal=61%
GOCC_PROTEASOME_COMPLEX	GOCC_PROTEASOME_COMPLEX		51	-0.444398	-1.87439	0.00699301	0.0453299	0.995	1100	tags=71%, list=33%, signal=104%
GOCC_TIM23_MITOCHONDRIAL_IMPORT_INNER_MEMBRANE_TRANSLOCASE_COMPLEX	GOCC_TIM23_MITOCHONDRIAL_IMPORT_INNER_MEMBRANE_TRANSLOCASE_COMPLEX		11	-0.681517	-1.87198	0.00320513	0.0461336	0.995	870	tags=64%, list=26%, signal=86%

## Sheet: gsea_report_for_neg_R.tsv
GOBP_MITOCHONDRIAL_TRANSLATION	GOBP_MITOCHONDRIAL_TRANSLATION	Details ...	62	-0.702926	-3.11066	0	0	0	909	tags=89%, list=27%, signal=120%
GOBP_MITOCHONDRIAL_GENE_EXPRESSION	GOBP_MITOCHONDRIAL_GENE_EXPRESSION	Details ...	65	-0.704928	-3.0625	0	0	0	909	tags=89%, list=27%, signal=120%
GOBP_DNA_TEMPLATED_DNA_REPLICATION	GOBP_DNA_TEMPLATED_DNA_REPLICATION	Details ...	39	-0.731564	-2.79429	0	0	0	231	tags=54%, list=7%, signal=57%
GOCC_ORGANELLAR_RIBOSOME	GOCC_ORGANELLAR_RIBOSOME	Details ...	53	-0.693389	-2.75088	0	0	0	909	tags=87%, list=27%, signal=117%
GOBP_ATP_SYNTHESIS_COUPLED_ELECTRON_TRANSPORT	GOBP_ATP_SYNTHESIS_COUPLED_ELECTRON_TRANSPORT	Details ...	77	-0.585332	-2.62586	0	0	0	1151	tags=77%, list=34%, signal=114%
GOCC_RESPIRASOME	GOCC_RESPIRASOME	Details ...	75	-0.587368	-2.56971	0	0	0	1148	tags=80%, list=34%, signal=119%
GOBP_DNA_REPLICATION	GOBP_DNA_REPLICATION	Details ...	79	-0.569963	-2.55714	0	0	0	492	tags=47%, list=15%, signal=54%
GOCC_MITOCHONDRIAL_LARGE_RIBOSOMAL_SUBUNIT	GOCC_MITOCHONDRIAL_LARGE_RIBOSOMAL_SUBUNIT	Details ...	33	-0.699076	-2.55242	0	0	0	850	tags=85%, list=25%, signal=113%
GOBP_NUCLEOSIDE_TRIPHOSPHATE_BIOSYNTHETIC_PROCESS	GOBP_NUCLEOSIDE_TRIPHOSPHATE_BIOSYNTHETIC_PROCESS	Details ...	78	-0.577286	-2.49494	0	0	0	1166	tags=78%, list=35%, signal=117%
GOBP_DNA_CONFORMATION_CHANGE	GOBP_DNA_CONFORMATION_CHANGE	Details ...	35	-0.685999	-2.48563	0	0	0	264	tags=46%, list=8%, signal=49%
GOMF_STRUCTURAL_CONSTITUENT_OF_CHROMATIN	GOMF_STRUCTURAL_CONSTITUENT_OF_CHROMATIN	Details ...	23	-0.757957	-2.47614	0	0	0	553	tags=70%, list=17%, signal=83%
GOBP_CELL_CYCLE_DNA_REPLICATION	GOBP_CELL_CYCLE_DNA_REPLICATION	Details ...	13	-0.875236	-2.46273	0	0	0	171	tags=77%, list=5%, signal=81%
GOBP_PROTON_MOTIVE_FORCE_DRIVEN_ATP_SYNTHESIS	GOBP_PROTON_MOTIVE_FORCE_DRIVEN_ATP_SYNTHESIS	Details ...	65	-0.569093	-2.43696	0	0	0	1166	tags=78%, list=35%, signal=118%
GOBP_REGULATION_OF_CHROMOSOME_SEGREGATION	GOBP_REGULATION_OF_CHROMOSOME_SEGREGATION	Details ...	64	-0.580714	-2.42634	0	0	0	420	tags=38%, list=13%, signal=42%
GOBP_SISTER_CHROMATID_SEGREGATION	GOBP_SISTER_CHROMATID_SEGREGATION	Details ...	100	-0.536202	-2.409	0	0	0	386	tags=36%, list=12%, signal=39%
GOBP_ATP_BIOSYNTHETIC_PROCESS	GOBP_ATP_BIOSYNTHETIC_PROCESS	Details ...	71	-0.55958	-2.40647	0	0	0	1166	tags=77%, list=35%, signal=116%
GOMF_OXIDOREDUCTION_DRIVEN_ACTIVE_TRANSMEMBRANE_TRANSPORTER_ACTIVITY	GOMF_OXIDOREDUCTION_DRIVEN_ACTIVE_TRANSMEMBRANE_TRANSPORTER_ACTIVITY	Details ...	54	-0.614228	-2.40129	0	0	0	1148	tags=85%, list=34%, signal=128%
GOBP_POSITIVE_REGULATION_OF_CHROMOSOME_SEPARATION	GOBP_POSITIVE_REGULATION_OF_CHROMOSOME_SEPARATION	Details ...	17	-0.780009	-2.40062	0	0	0	244	tags=59%, list=7%, signal=63%
GOBP_CHROMOSOME_SEPARATION	GOBP_CHROMOSOME_SEPARATION	Details ...	38	-0.645829	-2.39969	0	0	0	337	tags=47%, list=10%, signal=52%
GOBP_RESPIRATORY_ELECTRON_TRANSPORT_CHAIN	GOBP_RESPIRATORY_ELECTRON_TRANSPORT_CHAIN	Details ...	82	-0.548308	-2.39911	0	0	0	1151	tags=74%, list=34%, signal=111%
GOCC_ENDOPEPTIDASE_COMPLEX	GOCC_ENDOPEPTIDASE_COMPLEX		53	-0.579993	-2.39588	0	0	0	991	tags=72%, list=30%, signal=100%
GOBP_REGULATION_OF_SISTER_CHROMATID_SEGREGATION	GOBP_REGULATION_OF_SISTER_CHROMATID_SEGREGATION		49	-0.607663	-2.39543	0	0	0	386	tags=37%, list=12%, signal=41%
GOCC_PROTEIN_FOLDING_CHAPERONE_COMPLEX	GOCC_PROTEIN_FOLDING_CHAPERONE_COMPLEX		26	-0.697955	-2.38888	0	0	0	572	tags=62%, list=17%, signal=74%
GOCC_PROTEASOME_COMPLEX	GOCC_PROTEASOME_COMPLEX		51	-0.592527	-2.38067	0	3.88977e-05	0.001	991	tags=75%, list=30%, signal=104%
GOBP_REGULATION_OF_DNA_TEMPLATED_DNA_REPLICATION	GOBP_REGULATION_OF_DNA_TEMPLATED_DNA_REPLICATION		14	-0.834865	-2.38188	0	4.04536e-05	0.001	199	tags=79%, list=6%, signal=83%
GOCC_NADH_DEHYDROGENASE_COMPLEX	GOCC_NADH_DEHYDROGENASE_COMPLEX		41	-0.615324	-2.38208	0	4.21392e-05	0.001	1060	tags=83%, list=32%, signal=120%
GOBP_POSITIVE_REGULATION_OF_TELOMERASE_RNA_LOCALIZATION_TO_CAJAL_BODY	GOBP_POSITIVE_REGULATION_OF_TELOMERASE_RNA_LOCALIZATION_TO_CAJAL_BODY		13	-0.822844	-2.3302	0	6.36578e-05	0.002	572	tags=92%, list=17%, signal=111%
GOMF_DNA_HELICASE_ACTIVITY	GOMF_DNA_HELICASE_ACTIVITY		21	-0.723528	-2.33811	0	6.57113e-05	0.002	264	tags=48%, list=8%, signal=51%
GOBP_REGULATION_OF_MITOTIC_NUCLEAR_DIVISION	GOBP_REGULATION_OF_MITOTIC_NUCLEAR_DIVISION		41	-0.604886	-2.34244	0	6.79017e-05	0.002	361	tags=44%, list=11%, signal=49%
GOBP_MITOTIC_SISTER_CHROMATID_SEGREGATION	GOBP_MITOTIC_SISTER_CHROMATID_SEGREGATION		83	-0.548286	-2.34424	0	7.02431e-05	0.002	420	tags=41%, list=13%, signal=46%
GOBP_MITOCHONDRIAL_RESPIRATORY_CHAIN_COMPLEX_ASSEMBLY	GOBP_MITOCHONDRIAL_RESPIRATORY_CHAIN_COMPLEX_ASSEMBLY		51	-0.576488	-2.3569	0	7.27518e-05	0.002	1060	tags=76%, list=32%, signal=110%
GOMF_ELECTRON_TRANSFER_ACTIVITY	GOMF_ELECTRON_TRANSFER_ACTIVITY		69	-0.546088	-2.36021	0	7.54463e-05	0.002	1148	tags=80%, list=34%, signal=119%
GOBP_DNA_REPLICATION_INITIATION	GOBP_DNA_REPLICATION_INITIATION		10	-0.901469	-2.32018	0	8.7291e-05	0.003	199	tags=90%, list=6%, signal=95%
GOBP_DNA_UNWINDING_INVOLVED_IN_DNA_REPLICATION	GOBP_DNA_UNWINDING_INVOLVED_IN_DNA_REPLICATION		11	-0.889857	-2.32098	0	8.98584e-05	0.003	199	tags=82%, list=6%, signal=87%
GOBP_TELOMERASE_RNA_LOCALIZATION	GOBP_TELOMERASE_RNA_LOCALIZATION		14	-0.801113	-2.32142	0	9.25813e-05	0.003	572	tags=86%, list=17%, signal=103%
GOBP_NADH_DEHYDROGENASE_COMPLEX_ASSEMBLY	GOBP_NADH_DEHYDROGENASE_COMPLEX_ASSEMBLY		39	-0.608937	-2.31254	0	0.000113513	0.004	1060	tags=82%, list=32%, signal=119%
GOBP_PYRIMIDINE_CONTAINING_COMPOUND_BIOSYNTHETIC_PROCESS	GOBP_PYRIMIDINE_CONTAINING_COMPOUND_BIOSYNTHETIC_PROCESS		11	-0.842392	-2.29947	0	0.000133803	0.005	136	tags=55%, list=4%, signal=57%
GOBP_REGULATION_OF_UBIQUITIN_PROTEIN_LIGASE_ACTIVITY	GOBP_REGULATION_OF_UBIQUITIN_PROTEIN_LIGASE_ACTIVITY		12	-0.827414	-2.30661	0	0.000137419	0.005	122	tags=42%, list=4%, signal=43%
GOCC_CMG_COMPLEX	GOCC_CMG_COMPLEX		8	-0.943011	-2.28449	0	0.00014829	0.006	199	tags=100%, list=6%, signal=106%
GOBP_MITOTIC_SISTER_CHROMATID_SEPARATION	GOBP_MITOTIC_SISTER_CHROMATID_SEPARATION		31	-0.645364	-2.28802	0	0.000151998	0.006	337	tags=45%, list=10%, signal=50%
GOMF_SINGLE_STRANDED_DNA_HELICASE_ACTIVITY	GOMF_SINGLE_STRANDED_DNA_HELICASE_ACTIVITY		9	-0.925622	-2.29125	0	0.000155895	0.006	199	tags=89%, list=6%, signal=94%
GOCC_PROTEASOME_ACCESSORY_COMPLEX	GOCC_PROTEASOME_ACCESSORY_COMPLEX		21	-0.69482	-2.26593	0	0.000197652	0.009	991	tags=95%, list=30%, signal=135%
GOBP_ELECTRON_TRANSPORT_CHAIN	GOBP_ELECTRON_TRANSPORT_CHAIN		90	-0.504288	-2.27034	0	0.000202044	0.009	1151	tags=72%, list=34%, signal=107%
GOMF_OXIDOREDUCTASE_ACTIVITY_ACTING_ON_NAD_P_H_QUINONE_OR_SIMILAR_COMPOUND_AS_ACCEPTOR	GOMF_OXIDOREDUCTASE_ACTIVITY_ACTING_ON_NAD_P_H_QUINONE_OR_SIMILAR_COMPOUND_AS_ACCEPTOR		38	-0.608688	-2.2754	0	0.000206636	0.009	1060	tags=82%, list=32%, signal=118%
GOBP_CHROMOSOME_CONDENSATION	GOBP_CHROMOSOME_CONDENSATION		20	-0.728183	-2.27682	0	0.000211442	0.009	521	tags=60%, list=16%, signal=71%
GOBP_POSITIVE_REGULATION_OF_MITOTIC_SISTER_CHROMATID_SEPARATION	GOBP_POSITIVE_REGULATION_OF_MITOTIC_SISTER_CHROMATID_SEPARATION		11	-0.859705	-2.26289	0	0.000215153	0.01	123	tags=55%, list=4%, signal=56%
GOCC_CONDENSED_CHROMOSOME_CENTROMERIC_REGION	GOCC_CONDENSED_CHROMOSOME_CENTROMERIC_REGION		76	-0.526568	-2.27701	0	0.000216476	0.009	607	tags=37%, list=18%, signal=44%
GOBP_CHROMOSOME_LOCALIZATION	GOBP_CHROMOSOME_LOCALIZATION		46	-0.576579	-2.24834	0	0.000224935	0.012	328	tags=30%, list=10%, signal=33%
GOBP_RIBOSOMAL_LARGE_SUBUNIT_BIOGENESIS	GOBP_RIBOSOMAL_LARGE_SUBUNIT_BIOGENESIS		38	-0.580865	-2.2433	0	0.000226652	0.013	884	tags=55%, list=26%, signal=74%
GOBP_REGULATION_OF_DNA_TEMPLATED_DNA_REPLICATION_INITIATION	GOBP_REGULATION_OF_DNA_TEMPLATED_DNA_REPLICATION_INITIATION		8	-0.943011	-2.24876	0	0.000229179	0.012	199	tags=100%, list=6%, signal=106%
GOBP_REGULATION_OF_MITOTIC_SISTER_CHROMATID_SEGREGATION	GOBP_REGULATION_OF_MITOTIC_SISTER_CHROMATID_SEGREGATION		26	-0.662922	-2.24418	0	0.000230628	0.013	337	tags=50%, list=10%, signal=55%
GOBP_NEGATIVE_REGULATION_OF_CHROMOSOME_SEGREGATION	GOBP_NEGATIVE_REGULATION_OF_CHROMOSOME_SEGREGATION		23	-0.652413	-2.25031	0	0.000233586	0.012	337	tags=52%, list=10%, signal=58%
GOBP_NUCLEOSIDE_TRIPHOSPHATE_METABOLIC_PROCESS	GOBP_NUCLEOSIDE_TRIPHOSPHATE_METABOLIC_PROCESS		97	-0.489965	-2.24649	0	0.000234747	0.013	1166	tags=73%, list=35%, signal=109%
GOBP_DOUBLE_STRAND_BREAK_REPAIR_VIA_BREAK_INDUCED_REPLICATION	GOBP_DOUBLE_STRAND_BREAK_REPAIR_VIA_BREAK_INDUCED_REPLICATION		8	-0.943011	-2.25122	0	0.000238166	0.012	199	tags=100%, list=6%, signal=106%
GOBP_POSITIVE_REGULATION_OF_CELL_CYCLE_PROCESS	GOBP_POSITIVE_REGULATION_OF_CELL_CYCLE_PROCESS		78	-0.521282	-2.24752	0	0.000239015	0.013	364	tags=33%, list=11%, signal=37%
GOCC_DNA_REPLICATION_PREINITIATION_COMPLEX	GOCC_DNA_REPLICATION_PREINITIATION_COMPLEX		8	-0.943011	-2.24041	0	0.000240137	0.014	199	tags=100%, list=6%, signal=106%
GOMF_NAD_P_H_DEHYDROGENASE_QUINONE_ACTIVITY	GOMF_NAD_P_H_DEHYDROGENASE_QUINONE_ACTIVITY		37	-0.607095	-2.25526	0	0.000242929	0.012	1060	tags=81%, list=32%, signal=117%
GOCC_PEPTIDASE_COMPLEX	GOCC_PEPTIDASE_COMPLEX		66	-0.531713	-2.25646	0	0.000247887	0.012	991	tags=64%, list=30%, signal=89%
GOBP_PROTON_TRANSMEMBRANE_TRANSPORT	GOBP_PROTON_TRANSMEMBRANE_TRANSPORT		60	-0.523982	-2.25651	0	0.000253051	0.012	910	tags=52%, list=27%, signal=70%
GOCC_SPLICEOSOMAL_SNRNP_COMPLEX	GOCC_SPLICEOSOMAL_SNRNP_COMPLEX		47	-0.563511	-2.21166	0	0.000415529	0.025	1001	tags=66%, list=30%, signal=93%
GOCC_LARGE_RIBOSOMAL_SUBUNIT	GOCC_LARGE_RIBOSOMAL_SUBUNIT		87	-0.489189	-2.21194	0	0.000422454	0.025	909	tags=49%, list=27%, signal=66%
GOBP_PYRIMIDINE_NUCLEOSIDE_TRIPHOSPHATE_METABOLIC_PROCESS	GOBP_PYRIMIDINE_NUCLEOSIDE_TRIPHOSPHATE_METABOLIC_PROCESS		7	-0.943406	-2.20633	0	0.000441016	0.027	136	tags=86%, list=4%, signal=89%
GOBP_ATTACHMENT_OF_SPINDLE_MICROTUBULES_TO_KINETOCHORE	GOBP_ATTACHMENT_OF_SPINDLE_MICROTUBULES_TO_KINETOCHORE		22	-0.67298	-2.1986	0.00331126	0.000546878	0.034	328	tags=36%, list=10%, signal=40%
GOMF_PRIMARY_ACTIVE_TRANSMEMBRANE_TRANSPORTER_ACTIVITY	GOMF_PRIMARY_ACTIVE_TRANSMEMBRANE_TRANSPORTER_ACTIVITY		74	-0.496179	-2.19719	0	0.000554414	0.035	1060	tags=62%, list=32%, signal=89%
GOBP_SPLICEOSOMAL_SNRNP_ASSEMBLY	GOBP_SPLICEOSOMAL_SNRNP_ASSEMBLY		19	-0.688363	-2.19257	0	0.000591999	0.038	491	tags=58%, list=15%, signal=67%
GOBP_POSITIVE_REGULATION_OF_CHROMOSOME_SEGREGATION	GOBP_POSITIVE_REGULATION_OF_CHROMOSOME_SEGREGATION		16	-0.7508	-2.18532	0	0.000620267	0.041	244	tags=56%, list=7%, signal=60%
GOCC_REPLICATION_FORK	GOCC_REPLICATION_FORK		19	-0.69445	-2.1858	0	0.000629665	0.041	249	tags=47%, list=7%, signal=51%
GOCC_OXIDOREDUCTASE_COMPLEX	GOCC_OXIDOREDUCTASE_COMPLEX		75	-0.49882	-2.17952	0	0.000670555	0.045	1069	tags=72%, list=32%, signal=103%
GOBP_NEGATIVE_REGULATION_OF_NUCLEAR_DIVISION	GOBP_NEGATIVE_REGULATION_OF_NUCLEAR_DIVISION		24	-0.653991	-2.17849	0	0.000675349	0.046	361	tags=54%, list=11%, signal=60%
GOBP_REGULATION_OF_NUCLEAR_DIVISION	GOBP_REGULATION_OF_NUCLEAR_DIVISION		45	-0.557021	-2.17647	0	0.000695167	0.048	361	tags=40%, list=11%, signal=44%
GOBP_MITOCHONDRIAL_ELECTRON_TRANSPORT_NADH_TO_UBIQUINONE	GOBP_MITOCHONDRIAL_ELECTRON_TRANSPORT_NADH_TO_UBIQUINONE		40	-0.581724	-2.17628	0	0.000699601	0.049	1060	tags=75%, list=32%, signal=109%
GOBP_ATTACHMENT_OF_MITOTIC_SPINDLE_MICROTUBULES_TO_KINETOCHORE	GOBP_ATTACHMENT_OF_MITOTIC_SPINDLE_MICROTUBULES_TO_KINETOCHORE		11	-0.808457	-2.16881	0	0.000716769	0.053	328	tags=55%, list=10%, signal=60%
GOCC_SPLICEOSOMAL_TRI_SNRNP_COMPLEX	GOCC_SPLICEOSOMAL_TRI_SNRNP_COMPLEX		27	-0.605285	-2.16926	0	0.000726455	0.053	797	tags=63%, list=24%, signal=82%
GOBP_STEROL_BIOSYNTHETIC_PROCESS	GOBP_STEROL_BIOSYNTHETIC_PROCESS		15	-0.72863	-2.16969	0	0.000736407	0.053	732	tags=73%, list=22%, signal=93%
GOCC_MITOCHONDRIAL_SMALL_RIBOSOMAL_SUBUNIT	GOCC_MITOCHONDRIAL_SMALL_RIBOSOMAL_SUBUNIT		19	-0.683421	-2.17003	0	0.000746634	0.053	766	tags=79%, list=23%, signal=102%
GOCC_PROTEASOME_REGULATORY_PARTICLE	GOCC_PROTEASOME_REGULATORY_PARTICLE		19	-0.707794	-2.15876	0	0.00098633	0.074	991	tags=100%, list=30%, signal=141%
GOCC_PRECATALYTIC_SPLICEOSOME	GOCC_PRECATALYTIC_SPLICEOSOME		37	-0.57661	-2.15917	0	0.000999308	0.074	934	tags=62%, list=28%, signal=85%
GOBP_METAPHASE_CHROMOSOME_ALIGNMENT	GOBP_METAPHASE_CHROMOSOME_ALIGNMENT		39	-0.5742	-2.1552	0	0.00105197	0.079	328	tags=31%, list=10%, signal=34%
GOBP_MITOTIC_DNA_REPLICATION	GOBP_MITOTIC_DNA_REPLICATION		7	-0.932291	-2.15175	0	0.00111507	0.084	171	tags=86%, list=5%, signal=90%
GOCC_U2_TYPE_SPLICEOSOMAL_COMPLEX	GOCC_U2_TYPE_SPLICEOSOMAL_COMPLEX		54	-0.526653	-2.15029	0	0.00112664	0.086	950	tags=57%, list=28%, signal=79%
GOMF_CATALYTIC_ACTIVITY_ACTING_ON_DNA	GOMF_CATALYTIC_ACTIVITY_ACTING_ON_DNA		56	-0.522185	-2.13842	0	0.0014003	0.106	343	tags=36%, list=10%, signal=39%
GOBP_PYRIMIDINE_NUCLEOTIDE_BIOSYNTHETIC_PROCESS	GOBP_PYRIMIDINE_NUCLEOTIDE_BIOSYNTHETIC_PROCESS		10	-0.817624	-2.13604	0	0.00141986	0.108	136	tags=50%, list=4%, signal=52%
GOCC_SPINDLE_MICROTUBULE	GOCC_SPINDLE_MICROTUBULE		26	-0.641719	-2.13339	0	0.00145087	0.112	180	tags=27%, list=5%, signal=28%
GOBP_CELL_CYCLE_G2_M_PHASE_TRANSITION	GOBP_CELL_CYCLE_G2_M_PHASE_TRANSITION		49	-0.521933	-2.13156	0	0.00145248	0.115	678	tags=45%, list=20%, signal=55%
GOBP_REGULATION_OF_DNA_REPLICATION	GOBP_REGULATION_OF_DNA_REPLICATION		39	-0.56172	-2.13165	0	0.00146978	0.115	407	tags=46%, list=12%, signal=52%
GOCC_U12_TYPE_SPLICEOSOMAL_COMPLEX	GOCC_U12_TYPE_SPLICEOSOMAL_COMPLEX		19	-0.659844	-2.13077	0	0.00148287	0.117	1002	tags=89%, list=30%, signal=127%
GOBP_ESTABLISHMENT_OF_PROTEIN_LOCALIZATION_TO_TELOMERE	GOBP_ESTABLISHMENT_OF_PROTEIN_LOCALIZATION_TO_TELOMERE		10	-0.807923	-2.12552	0	0.00158292	0.126	651	tags=100%, list=19%, signal=124%
GOCC_NUCLEAR_CHROMOSOME	GOCC_NUCLEAR_CHROMOSOME		76	-0.48046	-2.11871	0	0.00173772	0.139	264	tags=29%, list=8%, signal=31%
GOCC_NUCLEOID	GOCC_NUCLEOID		17	-0.682908	-2.11591	0	0.00180909	0.146	778	tags=71%, list=23%, signal=92%
GOBP_MITOTIC_METAPHASE_CHROMOSOME_ALIGNMENT	GOBP_MITOTIC_METAPHASE_CHROMOSOME_ALIGNMENT		27	-0.631634	-2.11286	0	0.00188925	0.154	328	tags=37%, list=10%, signal=41%
GOBP_DEOXYRIBONUCLEOTIDE_BIOSYNTHETIC_PROCESS	GOBP_DEOXYRIBONUCLEOTIDE_BIOSYNTHETIC_PROCESS		9	-0.831723	-2.1064	0	0.00194715	0.161	346	tags=67%, list=10%, signal=74%
GOBP_ESTABLISHMENT_OF_PROTEIN_LOCALIZATION_TO_CHROMOSOME	GOBP_ESTABLISHMENT_OF_PROTEIN_LOCALIZATION_TO_CHROMOSOME		16	-0.708642	-2.10907	0	0.00195745	0.16	651	tags=81%, list=19%, signal=100%
GOBP_MITOTIC_SPINDLE_ORGANIZATION	GOBP_MITOTIC_SPINDLE_ORGANIZATION		55	-0.514791	-2.10168	0	0.00204626	0.168	386	tags=36%, list=12%, signal=40%
GOBP_REGULATION_OF_PROTEIN_LOCALIZATION_TO_CHROMOSOME_TELOMERIC_REGION	GOBP_REGULATION_OF_PROTEIN_LOCALIZATION_TO_CHROMOSOME_TELOMERIC_REGION		10	-0.831633	-2.09884	0	0.00215333	0.178	572	tags=100%, list=17%, signal=120%
GOBP_SPINDLE_ELONGATION	GOBP_SPINDLE_ELONGATION		6	-0.940048	-2.09092	0	0.00235943	0.199	166	tags=83%, list=5%, signal=88%
GOBP_PROTEIN_DNA_COMPLEX_ASSEMBLY	GOBP_PROTEIN_DNA_COMPLEX_ASSEMBLY		76	-0.486165	-2.09116	0	0.00237373	0.199	584	tags=41%, list=17%, signal=48%
GOBP_REGULATION_OF_ESTABLISHMENT_OF_PROTEIN_LOCALIZATION_TO_CHROMOSOME	GOBP_REGULATION_OF_ESTABLISHMENT_OF_PROTEIN_LOCALIZATION_TO_CHROMOSOME		10	-0.791961	-2.09201	0	0.00238761	0.198	572	tags=90%, list=17%, signal=108%
GOBP_POSITIVE_REGULATION_OF_UBIQUITIN_PROTEIN_LIGASE_ACTIVITY	GOBP_POSITIVE_REGULATION_OF_UBIQUITIN_PROTEIN_LIGASE_ACTIVITY		6	-0.951658	-2.08785	0	0.00241743	0.207	90	tags=67%, list=3%, signal=68%
GOMF_ISOMERASE_ACTIVITY	GOMF_ISOMERASE_ACTIVITY		47	-0.523552	-2.08444	0	0.00248522	0.214	977	tags=60%, list=29%, signal=83%
GOCC_METHYLOSOME	GOCC_METHYLOSOME		11	-0.796674	-2.08373	0	0.00251097	0.219	491	tags=82%, list=15%, signal=96%
GOBP_CENTROMERE_COMPLEX_ASSEMBLY	GOBP_CENTROMERE_COMPLEX_ASSEMBLY		15	-0.704965	-2.08216	0	0.00254634	0.223	385	tags=53%, list=12%, signal=60%
GOBP_MICROTUBULE_CYTOSKELETON_ORGANIZATION_INVOLVED_IN_MITOSIS	GOBP_MICROTUBULE_CYTOSKELETON_ORGANIZATION_INVOLVED_IN_MITOSIS		65	-0.480875	-2.07611	0	0.00272104	0.237	386	tags=35%, list=12%, signal=39%
GOBP_DNA_RECOMBINATION	GOBP_DNA_RECOMBINATION		96	-0.451607	-2.07428	0	0.00276387	0.242	666	tags=45%, list=20%, signal=54%
GOBP_STEROL_METABOLIC_PROCESS	GOBP_STEROL_METABOLIC_PROCESS		21	-0.645902	-2.07294	0	0.00279584	0.246	929	tags=71%, list=28%, signal=98%
GOCC_SM_LIKE_PROTEIN_FAMILY_COMPLEX	GOCC_SM_LIKE_PROTEIN_FAMILY_COMPLEX		51	-0.52727	-2.06936	0	0.00282384	0.256	1068	tags=67%, list=32%, signal=96%
GOBP_KINETOCHORE_ORGANIZATION	GOBP_KINETOCHORE_ORGANIZATION		13	-0.725966	-2.07015	0	0.00283114	0.255	420	tags=69%, list=13%, signal=79%
GOBP_POSITIVE_REGULATION_OF_ESTABLISHMENT_OF_PROTEIN_LOCALIZATION_TO_TELOMERE	GOBP_POSITIVE_REGULATION_OF_ESTABLISHMENT_OF_PROTEIN_LOCALIZATION_TO_TELOMERE		9	-0.831383	-2.071	0.00262467	0.00284651	0.251	572	tags=100%, list=17%, signal=120%
GOBP_DNA_STRAND_ELONGATION_INVOLVED_IN_DNA_REPLICATION	GOBP_DNA_STRAND_ELONGATION_INVOLVED_IN_DNA_REPLICATION		6	-0.950839	-2.07026	0	0.0028483	0.254	171	tags=100%, list=5%, signal=105%
GOBP_POSITIVE_REGULATION_OF_CELL_CYCLE_CHECKPOINT	GOBP_POSITIVE_REGULATION_OF_CELL_CYCLE_CHECKPOINT		7	-0.887018	-2.06643	0	0.00292006	0.262	328	tags=71%, list=10%, signal=79%
GOCC_OUTER_KINETOCHORE	GOCC_OUTER_KINETOCHORE		8	-0.845529	-2.06507	0	0.00297635	0.268	328	tags=75%, list=10%, signal=83%
GOMF_PROTON_TRANSMEMBRANE_TRANSPORTER_ACTIVITY	GOMF_PROTON_TRANSMEMBRANE_TRANSPORTER_ACTIVITY		45	-0.535513	-2.06037	0	0.00314938	0.283	910	tags=53%, list=27%, signal=72%
GOBP_POSITIVE_REGULATION_OF_MITOTIC_CELL_CYCLE_SPINDLE_ASSEMBLY_CHECKPOINT	GOBP_POSITIVE_REGULATION_OF_MITOTIC_CELL_CYCLE_SPINDLE_ASSEMBLY_CHECKPOINT		7	-0.887018	-2.05932	0	0.00321242	0.29	328	tags=71%, list=10%, signal=79%
GOBP_REGULATION_OF_METAPHASE_PLATE_CONGRESSION	GOBP_REGULATION_OF_METAPHASE_PLATE_CONGRESSION		7	-0.880382	-2.05539	0	0.00325366	0.297	99	tags=43%, list=3%, signal=44%
GOCC_PROTEASOME_CORE_COMPLEX	GOCC_PROTEASOME_CORE_COMPLEX		18	-0.665394	-2.05638	0	0.00325602	0.296	925	tags=83%, list=28%, signal=115%
GOMF_SINGLE_STRANDED_DNA_BINDING	GOMF_SINGLE_STRANDED_DNA_BINDING		46	-0.522044	-2.05288	0	0.00333909	0.304	653	tags=41%, list=20%, signal=51%
GOBP_PROTEIN_LOCALIZATION_TO_NUCLEAR_BODY	GOBP_PROTEIN_LOCALIZATION_TO_NUCLEAR_BODY		9	-0.831383	-2.05191	0	0.00335398	0.307	572	tags=100%, list=17%, signal=120%
GOMF_ATP_DEPENDENT_ACTIVITY_ACTING_ON_DNA	GOMF_ATP_DEPENDENT_ACTIVITY_ACTING_ON_DNA		39	-0.548792	-2.04288	0.004329	0.00363755	0.332	343	tags=36%, list=10%, signal=40%
GOBP_DNA_BIOSYNTHETIC_PROCESS	GOBP_DNA_BIOSYNTHETIC_PROCESS		62	-0.478031	-2.04007	0	0.00377853	0.348	609	tags=50%, list=18%, signal=60%
GOCC_INTERCELLULAR_BRIDGE	GOCC_INTERCELLULAR_BRIDGE		20	-0.637803	-2.03365	0	0.00411272	0.377	726	tags=65%, list=22%, signal=83%
GOMF_ACTIVE_TRANSMEMBRANE_TRANSPORTER_ACTIVITY	GOMF_ACTIVE_TRANSMEMBRANE_TRANSPORTER_ACTIVITY		88	-0.455684	-2.03264	0	0.00416278	0.385	814	tags=48%, list=24%, signal=61%
GOCC_MCM_COMPLEX	GOCC_MCM_COMPLEX		6	-0.942446	-2.0298	0	0.00430517	0.397	199	tags=100%, list=6%, signal=106%
GOBP_POSITIVE_REGULATION_OF_CELL_CYCLE_PHASE_TRANSITION	GOBP_POSITIVE_REGULATION_OF_CELL_CYCLE_PHASE_TRANSITION		41	-0.529679	-2.02469	0	0.00455995	0.424	364	tags=34%, list=11%, signal=38%
GOMF_STRUCTURAL_CONSTITUENT_OF_CYTOSKELETON	GOMF_STRUCTURAL_CONSTITUENT_OF_CYTOSKELETON		32	-0.552562	-2.02477	0.00378788	0.00459702	0.424	243	tags=28%, list=7%, signal=30%
GOBP_NUCLEOSOME_ORGANIZATION	GOBP_NUCLEOSOME_ORGANIZATION		51	-0.506007	-2.02506	0	0.00460976	0.422	553	tags=39%, list=17%, signal=46%
GOBP_U2_TYPE_PRESPLICEOSOME_ASSEMBLY	GOBP_U2_TYPE_PRESPLICEOSOME_ASSEMBLY		21	-0.623078	-2.01116	0	0.00537328	0.496	1001	tags=81%, list=30%, signal=115%
GOCC_CYTOCHROME_COMPLEX	GOCC_CYTOCHROME_COMPLEX		26	-0.590328	-2.01192	0	0.00538416	0.495	1199	tags=85%, list=36%, signal=131%
GOCC_CHAPERONIN_CONTAINING_T_COMPLEX	GOCC_CHAPERONIN_CONTAINING_T_COMPLEX		8	-0.831134	-2.01252	0	0.00540527	0.491	572	tags=100%, list=17%, signal=120%
GOBP_DNA_STRAND_ELONGATION	GOBP_DNA_STRAND_ELONGATION		14	-0.713317	-2.0131	0	0.00541561	0.489	371	tags=64%, list=11%, signal=72%
GOBP_SPINDLE_ORGANIZATION	GOBP_SPINDLE_ORGANIZATION		77	-0.453894	-2.01197	0	0.00542655	0.495	386	tags=30%, list=12%, signal=33%
GOBP_PYRIMIDINE_NUCLEOTIDE_METABOLIC_PROCESS	GOBP_PYRIMIDINE_NUCLEOTIDE_METABOLIC_PROCESS		14	-0.71858	-2.0093	0.00280899	0.0054335	0.503	136	tags=43%, list=4%, signal=44%
GOBP_MITOTIC_CHROMOSOME_CONDENSATION	GOBP_MITOTIC_CHROMOSOME_CONDENSATION		9	-0.798279	-2.00503	0	0.00563512	0.52	420	tags=78%, list=13%, signal=89%
GOBP_CELL_CYCLE_CHECKPOINT_SIGNALING	GOBP_CELL_CYCLE_CHECKPOINT_SIGNALING		61	-0.494335	-2.00601	0	0.00563989	0.519	678	tags=46%, list=20%, signal=57%
GOBP_ATP_METABOLIC_PROCESS	GOBP_ATP_METABOLIC_PROCESS		80	-0.465173	-2.00292	0	0.00578296	0.532	1166	tags=74%, list=35%, signal=111%
GOBP_POSITIVE_REGULATION_OF_MITOTIC_CELL_CYCLE_PHASE_TRANSITION	GOBP_POSITIVE_REGULATION_OF_MITOTIC_CELL_CYCLE_PHASE_TRANSITION		36	-0.541027	-2.00004	0.00406504	0.00598892	0.545	241	tags=31%, list=7%, signal=33%
GOBP_PROTEIN_LOCALIZATION_TO_NUCLEOPLASM	GOBP_PROTEIN_LOCALIZATION_TO_NUCLEOPLASM		11	-0.732778	-1.99545	0	0.00625942	0.568	572	tags=82%, list=17%, signal=98%
GOBP_REGULATION_OF_CELL_CYCLE_G2_M_PHASE_TRANSITION	GOBP_REGULATION_OF_CELL_CYCLE_G2_M_PHASE_TRANSITION		37	-0.530989	-1.99056	0	0.00660752	0.591	678	tags=51%, list=20%, signal=64%
GOBP_REGULATION_OF_ATTACHMENT_OF_MITOTIC_SPINDLE_MICROTUBULES_TO_KINETOCHORE	GOBP_REGULATION_OF_ATTACHMENT_OF_MITOTIC_SPINDLE_MICROTUBULES_TO_KINETOCHORE		5	-0.941987	-1.98895	0	0.00667743	0.595	99	tags=60%, list=3%, signal=62%
GOBP_PROTEIN_LOCALIZATION_TO_CHROMOSOME	GOBP_PROTEIN_LOCALIZATION_TO_CHROMOSOME		46	-0.510193	-1.98459	0	0.00706861	0.615	493	tags=43%, list=15%, signal=50%
GOBP_NEGATIVE_REGULATION_OF_CHROMOSOME_ORGANIZATION	GOBP_NEGATIVE_REGULATION_OF_CHROMOSOME_ORGANIZATION		43	-0.499314	-1.98341	0	0.00712744	0.622	337	tags=33%, list=10%, signal=36%
GOBP_CELL_REDOX_HOMEOSTASIS	GOBP_CELL_REDOX_HOMEOSTASIS		18	-0.6219	-1.98185	0	0.00717088	0.625	712	tags=61%, list=21%, signal=77%
GOCC_PRERIBOSOME	GOCC_PRERIBOSOME		45	-0.51069	-1.98033	0	0.00728527	0.634	868	tags=56%, list=26%, signal=74%
GOMF_PROTEIN_CARRIER_CHAPERONE	GOMF_PROTEIN_CARRIER_CHAPERONE		14	-0.67123	-1.97949	0.003003	0.00730542	0.637	490	tags=43%, list=15%, signal=50%
GOBP_POSITIVE_REGULATION_OF_CELL_CYCLE	GOBP_POSITIVE_REGULATION_OF_CELL_CYCLE		94	-0.446813	-1.97879	0	0.00733207	0.64	364	tags=30%, list=11%, signal=32%
GOBP_RRNA_METABOLIC_PROCESS	GOBP_RRNA_METABOLIC_PROCESS		90	-0.444191	-1.97403	0	0.00760598	0.659	884	tags=52%, list=26%, signal=69%
GOCC_NUCLEOSOME	GOCC_NUCLEOSOME		36	-0.534041	-1.97289	0	0.0076442	0.663	607	tags=50%, list=18%, signal=60%
GOCC_INNER_KINETOCHORE	GOCC_INNER_KINETOCHORE		9	-0.788574	-1.97166	0.0027027	0.00772389	0.671	385	tags=67%, list=12%, signal=75%
GOBP_NUCLEOSIDE_MONOPHOSPHATE_BIOSYNTHETIC_PROCESS	GOBP_NUCLEOSIDE_MONOPHOSPHATE_BIOSYNTHETIC_PROCESS		17	-0.672736	-1.96573	0	0.00811264	0.696	707	tags=65%, list=21%, signal=82%
GOBP_MITOTIC_CELL_CYCLE_CHECKPOINT_SIGNALING	GOBP_MITOTIC_CELL_CYCLE_CHECKPOINT_SIGNALING		47	-0.511405	-1.96622	0	0.00814754	0.695	656	tags=49%, list=20%, signal=60%
GOBP_FATTY_ACID_BIOSYNTHETIC_PROCESS	GOBP_FATTY_ACID_BIOSYNTHETIC_PROCESS		26	-0.569467	-1.96398	0	0.00821382	0.706	483	tags=38%, list=14%, signal=45%
GOMF_OXIDOREDUCTASE_ACTIVITY_ACTING_ON_NAD_P_H	GOMF_OXIDOREDUCTASE_ACTIVITY_ACTING_ON_NAD_P_H		42	-0.511013	-1.95928	0	0.008592	0.722	1060	tags=79%, list=32%, signal=114%
GOBP_REGULATION_OF_ATTACHMENT_OF_SPINDLE_MICROTUBULES_TO_KINETOCHORE	GOBP_REGULATION_OF_ATTACHMENT_OF_SPINDLE_MICROTUBULES_TO_KINETOCHORE		9	-0.783798	-1.94985	0	0.00956842	0.767	99	tags=44%, list=3%, signal=46%
GOBP_TRNA_METABOLIC_PROCESS	GOBP_TRNA_METABOLIC_PROCESS		36	-0.515578	-1.94875	0	0.00963859	0.768	1100	tags=75%, list=33%, signal=111%
GOBP_REGULATION_OF_CELL_CYCLE_CHECKPOINT	GOBP_REGULATION_OF_CELL_CYCLE_CHECKPOINT		17	-0.619941	-1.94554	0.00296736	0.00990987	0.784	337	tags=47%, list=10%, signal=52%
GOMF_3_5_DNA_HELICASE_ACTIVITY	GOMF_3_5_DNA_HELICASE_ACTIVITY		6	-0.890445	-1.94574	0	0.00995455	0.783	199	tags=50%, list=6%, signal=53%
GOBP_REGULATION_OF_MITOTIC_CELL_CYCLE_SPINDLE_ASSEMBLY_CHECKPOINT	GOBP_REGULATION_OF_MITOTIC_CELL_CYCLE_SPINDLE_ASSEMBLY_CHECKPOINT		11	-0.720246	-1.94494	0	0.00996435	0.786	337	tags=73%, list=10%, signal=81%
GOBP_POSITIVE_REGULATION_OF_MITOTIC_CELL_CYCLE	GOBP_POSITIVE_REGULATION_OF_MITOTIC_CELL_CYCLE		43	-0.502496	-1.93206	0	0.011678	0.835	597	tags=40%, list=18%, signal=48%
GOCC_CONDENSED_NUCLEAR_CHROMOSOME	GOCC_CONDENSED_NUCLEAR_CHROMOSOME		19	-0.608665	-1.93091	0	0.0117773	0.839	700	tags=58%, list=21%, signal=73%
GOMF_ANAPHASE_PROMOTING_COMPLEX_BINDING	GOMF_ANAPHASE_PROMOTING_COMPLEX_BINDING		5	-0.951347	-1.9298	0	0.0119136	0.842	90	tags=80%, list=3%, signal=82%
GOBP_DEOXYRIBONUCLEOTIDE_METABOLIC_PROCESS	GOBP_DEOXYRIBONUCLEOTIDE_METABOLIC_PROCESS		17	-0.621586	-1.92886	0	0.0119716	0.846	346	tags=41%, list=10%, signal=46%
GOBP_PROTEIN_LOCALIZATION_TO_CHROMATIN	GOBP_PROTEIN_LOCALIZATION_TO_CHROMATIN		19	-0.588495	-1.92483	0.00890208	0.0125881	0.861	493	tags=47%, list=15%, signal=55%
GOBP_RNA_CAPPING	GOBP_RNA_CAPPING		11	-0.725463	-1.9222	0.00280112	0.0129687	0.867	877	tags=91%, list=26%, signal=123%
GOCC_U2_TYPE_CATALYTIC_STEP_2_SPLICEOSOME	GOCC_U2_TYPE_CATALYTIC_STEP_2_SPLICEOSOME		18	-0.601993	-1.91734	0.00324675	0.0133548	0.881	902	tags=67%, list=27%, signal=91%
GOMF_DNA_BINDING_BENDING	GOMF_DNA_BINDING_BENDING		7	-0.83369	-1.91838	0	0.0133631	0.879	211	tags=71%, list=6%, signal=76%
GOBP_PYRIMIDINE_NUCLEOSIDE_TRIPHOSPHATE_BIOSYNTHETIC_PROCESS	GOBP_PYRIMIDINE_NUCLEOSIDE_TRIPHOSPHATE_BIOSYNTHETIC_PROCESS		5	-0.93488	-1.91771	0	0.0133744	0.88	136	tags=80%, list=4%, signal=83%
GOBP_MITOTIC_SPINDLE_ASSEMBLY	GOBP_MITOTIC_SPINDLE_ASSEMBLY		35	-0.509173	-1.9115	0	0.0142387	0.898	166	tags=29%, list=5%, signal=30%
GOMF_PEROXIREDOXIN_ACTIVITY	GOMF_PEROXIREDOXIN_ACTIVITY		8	-0.79536	-1.91017	0	0.0144334	0.902	459	tags=50%, list=14%, signal=58%
GOBP_POSITIVE_REGULATION_OF_FIBROBLAST_PROLIFERATION	GOBP_POSITIVE_REGULATION_OF_FIBROBLAST_PROLIFERATION		16	-0.634991	-1.90869	0.00316456	0.0145839	0.908	286	tags=44%, list=9%, signal=48%
GOCC_RESPIRATORY_CHAIN_COMPLEX_IV	GOCC_RESPIRATORY_CHAIN_COMPLEX_IV		18	-0.624311	-1.90798	0	0.014635	0.911	1199	tags=94%, list=36%, signal=146%
GOBP_MEIOTIC_CELL_CYCLE_PROCESS	GOBP_MEIOTIC_CELL_CYCLE_PROCESS		42	-0.489504	-1.90663	0	0.0147815	0.914	328	tags=36%, list=10%, signal=39%
GOBP_MITOCHONDRIAL_ELECTRON_TRANSPORT_CYTOCHROME_C_TO_OXYGEN	GOBP_MITOCHONDRIAL_ELECTRON_TRANSPORT_CYTOCHROME_C_TO_OXYGEN		16	-0.622109	-1.9045	0	0.0151413	0.921	1199	tags=94%, list=36%, signal=146%
GOMF_METAL_CLUSTER_BINDING	GOMF_METAL_CLUSTER_BINDING		18	-0.616143	-1.89793	0	0.0162681	0.935	1114	tags=89%, list=33%, signal=133%
GOBP_LONG_CHAIN_FATTY_ACID_METABOLIC_PROCESS	GOBP_LONG_CHAIN_FATTY_ACID_METABOLIC_PROCESS		13	-0.653513	-1.89635	0	0.0164977	0.936	397	tags=38%, list=12%, signal=43%
GOBP_ANAPHASE_PROMOTING_COMPLEX_DEPENDENT_CATABOLIC_PROCESS	GOBP_ANAPHASE_PROMOTING_COMPLEX_DEPENDENT_CATABOLIC_PROCESS		10	-0.737455	-1.89432	0.00285714	0.0166757	0.942	337	tags=50%, list=10%, signal=55%
GOBP_POSITIVE_REGULATION_OF_ATTACHMENT_OF_SPINDLE_MICROTUBULES_TO_KINETOCHORE	GOBP_POSITIVE_REGULATION_OF_ATTACHMENT_OF_SPINDLE_MICROTUBULES_TO_KINETOCHORE		8	-0.785123	-1.89462	0.00769231	0.0167429	0.942	99	tags=50%, list=3%, signal=51%
GOCC_CONDENSIN_COMPLEX	GOCC_CONDENSIN_COMPLEX		5	-0.875936	-1.89317	0.00248756	0.0168531	0.943	420	tags=100%, list=13%, signal=114%
GOBP_RNA_METHYLATION	GOBP_RNA_METHYLATION		15	-0.649732	-1.89191	0.00566572	0.0168858	0.945	878	tags=73%, list=26%, signal=99%
GOBP_GMP_BIOSYNTHETIC_PROCESS	GOBP_GMP_BIOSYNTHETIC_PROCESS		9	-0.746867	-1.89224	0.00271003	0.0169303	0.944	707	tags=89%, list=21%, signal=112%
GOBP_PROTEIN_DNA_COMPLEX_DISASSEMBLY	GOBP_PROTEIN_DNA_COMPLEX_DISASSEMBLY		13	-0.647774	-1.88762	0.00290698	0.0176803	0.955	793	tags=46%, list=24%, signal=60%
GOBP_INNER_MITOCHONDRIAL_MEMBRANE_ORGANIZATION	GOBP_INNER_MITOCHONDRIAL_MEMBRANE_ORGANIZATION		15	-0.653181	-1.88412	0	0.0184323	0.958	893	tags=73%, list=27%, signal=100%
GOBP_POSITIVE_REGULATION_OF_UBIQUITIN_PROTEIN_TRANSFERASE_ACTIVITY	GOBP_POSITIVE_REGULATION_OF_UBIQUITIN_PROTEIN_TRANSFERASE_ACTIVITY		10	-0.721593	-1.88097	0	0.0189344	0.959	90	tags=40%, list=3%, signal=41%
GOBP_NUCLEOSIDE_MONOPHOSPHATE_METABOLIC_PROCESS	GOBP_NUCLEOSIDE_MONOPHOSPHATE_METABOLIC_PROCESS		28	-0.534683	-1.88029	0	0.0189756	0.96	707	tags=46%, list=21%, signal=58%
GOMF_DNA_POLYMERASE_BINDING	GOMF_DNA_POLYMERASE_BINDING		11	-0.722201	-1.87575	0.00555556	0.019778	0.966	651	tags=82%, list=19%, signal=101%
GOBP_OUTER_MITOCHONDRIAL_MEMBRANE_ORGANIZATION	GOBP_OUTER_MITOCHONDRIAL_MEMBRANE_ORGANIZATION		12	-0.70546	-1.87625	0	0.0197975	0.966	508	tags=67%, list=15%, signal=78%
GOBP_PYRIMIDINE_CONTAINING_COMPOUND_METABOLIC_PROCESS	GOBP_PYRIMIDINE_CONTAINING_COMPOUND_METABOLIC_PROCESS		22	-0.566809	-1.87087	0.00337838	0.0208279	0.972	172	tags=36%, list=5%, signal=38%
GOMF_DNA_REPLICATION_ORIGIN_BINDING	GOMF_DNA_REPLICATION_ORIGIN_BINDING		5	-0.910976	-1.87005	0	0.0208524	0.973	199	tags=80%, list=6%, signal=85%
GOBP_RIBOSOMAL_SMALL_SUBUNIT_BIOGENESIS	GOBP_RIBOSOMAL_SMALL_SUBUNIT_BIOGENESIS		45	-0.471982	-1.86784	0	0.0212627	0.978	1079	tags=62%, list=32%, signal=91%
GOBP_RESPONSE_TO_INTERLEUKIN_4	GOBP_RESPONSE_TO_INTERLEUKIN_4		19	-0.591643	-1.86696	0.00326797	0.0212954	0.979	121	tags=32%, list=4%, signal=33%
GOBP_PROTEIN_LOCALIZATION_TO_CHROMOSOME_CENTROMERIC_REGION	GOBP_PROTEIN_LOCALIZATION_TO_CHROMOSOME_CENTROMERIC_REGION		11	-0.67731	-1.86582	0.00258398	0.0214795	0.98	268	tags=36%, list=8%, signal=39%
GOBP_FIBROBLAST_PROLIFERATION	GOBP_FIBROBLAST_PROLIFERATION		37	-0.494973	-1.86453	0.00373134	0.0217057	0.981	340	tags=35%, list=10%, signal=39%
GOCC_MITOTIC_SPINDLE	GOCC_MITOTIC_SPINDLE		67	-0.440521	-1.86206	0	0.0221199	0.981	507	tags=31%, list=15%, signal=36%
GOBP_MITOCHONDRIAL_RNA_METABOLIC_PROCESS	GOBP_MITOCHONDRIAL_RNA_METABOLIC_PROCESS		8	-0.754249	-1.85637	0.00255754	0.0235126	0.982	753	tags=88%, list=23%, signal=113%
GOBP_PROTEIN_MATURATION_BY_IRON_SULFUR_CLUSTER_TRANSFER	GOBP_PROTEIN_MATURATION_BY_IRON_SULFUR_CLUSTER_TRANSFER		7	-0.783208	-1.8544	0.0025641	0.0236939	0.983	731	tags=100%, list=22%, signal=128%
GOBP_POSITIVE_REGULATION_OF_METAPHASE_ANAPHASE_TRANSITION_OF_CELL_CYCLE	GOBP_POSITIVE_REGULATION_OF_METAPHASE_ANAPHASE_TRANSITION_OF_CELL_CYCLE		8	-0.774049	-1.85483	0	0.0237118	0.983	123	tags=38%, list=4%, signal=39%
GOBP_PROTEIN_INSERTION_INTO_MEMBRANE	GOBP_PROTEIN_INSERTION_INTO_MEMBRANE		33	-0.526657	-1.85274	0	0.0240787	0.984	582	tags=42%, list=17%, signal=51%
GOMF_THIOREDOXIN_DEPENDENT_PEROXIREDOXIN_ACTIVITY	GOMF_THIOREDOXIN_DEPENDENT_PEROXIREDOXIN_ACTIVITY		6	-0.834224	-1.85223	0	0.0240898	0.984	459	tags=67%, list=14%, signal=77%
GOMF_NUCLEOSIDE_DIPHOSPHATE_KINASE_ACTIVITY	GOMF_NUCLEOSIDE_DIPHOSPHATE_KINASE_ACTIVITY		5	-0.89254	-1.84921	0	0.0248074	0.988	136	tags=60%, list=4%, signal=62%
GOBP_ORGANIC_ACID_BIOSYNTHETIC_PROCESS	GOBP_ORGANIC_ACID_BIOSYNTHETIC_PROCESS		52	-0.465238	-1.84814	0	0.0249334	0.988	397	tags=31%, list=12%, signal=34%
GOMF_TRANSLATION_ELONGATION_FACTOR_ACTIVITY	GOMF_TRANSLATION_ELONGATION_FACTOR_ACTIVITY		8	-0.764121	-1.84733	0.00492611	0.0250531	0.99	449	tags=50%, list=13%, signal=58%
GOBP_POSITIVE_REGULATION_OF_CHROMOSOME_CONDENSATION	GOBP_POSITIVE_REGULATION_OF_CHROMOSOME_CONDENSATION		5	-0.875936	-1.8461	0	0.0253293	0.99	420	tags=100%, list=13%, signal=114%
GOBP_DEOXYRIBONUCLEOSIDE_MONOPHOSPHATE_BIOSYNTHETIC_PROCESS	GOBP_DEOXYRIBONUCLEOSIDE_MONOPHOSPHATE_BIOSYNTHETIC_PROCESS		6	-0.823656	-1.84564	0	0.0253395	0.99	346	tags=67%, list=10%, signal=74%
GOBP_POSITIVE_REGULATION_OF_INTRINSIC_APOPTOTIC_SIGNALING_PATHWAY_BY_P53_CLASS_MEDIATOR	GOBP_POSITIVE_REGULATION_OF_INTRINSIC_APOPTOTIC_SIGNALING_PATHWAY_BY_P53_CLASS_MEDIATOR		6	-0.828981	-1.84399	0.00247525	0.0255645	0.99	127	tags=33%, list=4%, signal=35%
GOBP_SPINDLE_ASSEMBLY	GOBP_SPINDLE_ASSEMBLY		52	-0.457246	-1.84439	0	0.0255956	0.99	170	tags=25%, list=5%, signal=26%
GOCC_PROTEASOME_REGULATORY_PARTICLE_BASE_SUBCOMPLEX	GOCC_PROTEASOME_REGULATORY_PARTICLE_BASE_SUBCOMPLEX		9	-0.714371	-1.83174	0	0.0281724	0.995	962	tags=100%, list=29%, signal=140%
GOBP_GMP_METABOLIC_PROCESS	GOBP_GMP_METABOLIC_PROCESS		13	-0.64987	-1.83401	0	0.0281885	0.994	707	tags=62%, list=21%, signal=78%
GOBP_PROTEIN_TARGETING_TO_MITOCHONDRION	GOBP_PROTEIN_TARGETING_TO_MITOCHONDRION		47	-0.463336	-1.83187	0	0.0282647	0.995	530	tags=38%, list=16%, signal=45%
GOCC_U1_SNRNP	GOCC_U1_SNRNP		15	-0.622867	-1.83321	0.0121951	0.0282689	0.994	877	tags=73%, list=26%, signal=99%
GOCC_SPINDLE_MIDZONE	GOCC_SPINDLE_MIDZONE		13	-0.656646	-1.83249	0.00828729	0.0283439	0.994	180	tags=38%, list=5%, signal=40%
GOBP_7_METHYLGUANOSINE_CAP_HYPERMETHYLATION	GOBP_7_METHYLGUANOSINE_CAP_HYPERMETHYLATION		7	-0.7929	-1.83198	0	0.0283819	0.994	491	tags=86%, list=15%, signal=100%
GOBP_REGULATION_OF_CHROMOSOME_CONDENSATION	GOBP_REGULATION_OF_CHROMOSOME_CONDENSATION		9	-0.71823	-1.82997	0.00249377	0.0286341	0.995	420	tags=56%, list=13%, signal=63%
GOBP_UNSATURATED_FATTY_ACID_BIOSYNTHETIC_PROCESS	GOBP_UNSATURATED_FATTY_ACID_BIOSYNTHETIC_PROCESS		10	-0.705617	-1.82685	0.013624	0.0293776	0.996	33	tags=30%, list=1%, signal=30%
GOMF_MOLECULAR_CARRIER_ACTIVITY	GOMF_MOLECULAR_CARRIER_ACTIVITY		30	-0.521941	-1.82408	0	0.0301262	0.996	806	tags=57%, list=24%, signal=74%
GOBP_GTP_METABOLIC_PROCESS	GOBP_GTP_METABOLIC_PROCESS		8	-0.756564	-1.81849	0	0.0317418	0.998	189	tags=50%, list=6%, signal=53%
GOCC_SMN_SM_PROTEIN_COMPLEX	GOCC_SMN_SM_PROTEIN_COMPLEX		8	-0.754394	-1.81888	0.00253807	0.031748	0.998	491	tags=75%, list=15%, signal=88%
GOBP_DENDRITIC_CELL_DIFFERENTIATION	GOBP_DENDRITIC_CELL_DIFFERENTIATION		14	-0.641764	-1.8138	0.00288184	0.0330951	0.998	72	tags=29%, list=2%, signal=29%
GOBP_MITOCHONDRIAL_TRANSMEMBRANE_TRANSPORT	GOBP_MITOCHONDRIAL_TRANSMEMBRANE_TRANSPORT		20	-0.559097	-1.81056	0.0135593	0.0341417	0.999	530	tags=45%, list=16%, signal=53%
GOCC_SNO_S_RNA_CONTAINING_RIBONUCLEOPROTEIN_COMPLEX	GOCC_SNO_S_RNA_CONTAINING_RIBONUCLEOPROTEIN_COMPLEX		10	-0.707725	-1.80801	0	0.0348984	0.999	797	tags=80%, list=24%, signal=105%
GOCC_U2_SNRNP	GOCC_U2_SNRNP		22	-0.566131	-1.80759	0	0.0349293	0.999	1001	tags=77%, list=30%, signal=110%
GOBP_ALPHA_LINOLENIC_ACID_METABOLIC_PROCESS	GOBP_ALPHA_LINOLENIC_ACID_METABOLIC_PROCESS		5	-0.858251	-1.80699	0.00477327	0.0349464	0.999	29	tags=40%, list=1%, signal=40%
GOCC_HETEROCHROMATIN	GOCC_HETEROCHROMATIN		30	-0.507388	-1.80663	0	0.0349575	0.999	536	tags=47%, list=16%, signal=55%
GOBP_MATURATION_OF_LSU_RRNA	GOBP_MATURATION_OF_LSU_RRNA		14	-0.627648	-1.80578	0.0120482	0.0351031	0.999	1074	tags=86%, list=32%, signal=126%
GOCC_MICROTUBULE_ASSOCIATED_COMPLEX	GOCC_MICROTUBULE_ASSOCIATED_COMPLEX		26	-0.516615	-1.80495	0	0.0352708	0.999	166	tags=19%, list=5%, signal=20%
GOMF_TRANSFERASE_ACTIVITY_TRANSFERRING_ALKYL_OR_ARYL_OTHER_THAN_METHYL_GROUPS	GOMF_TRANSFERASE_ACTIVITY_TRANSFERRING_ALKYL_OR_ARYL_OTHER_THAN_METHYL_GROUPS		14	-0.629296	-1.8003	0.011976	0.0365664	1	998	tags=71%, list=30%, signal=101%
GOCC_OUTER_MITOCHONDRIAL_MEMBRANE_PROTEIN_COMPLEX	GOCC_OUTER_MITOCHONDRIAL_MEMBRANE_PROTEIN_COMPLEX		13	-0.620078	-1.79636	0	0.0376681	1	883	tags=77%, list=26%, signal=104%
GOBP_POSITIVE_REGULATION_OF_DNA_BIOSYNTHETIC_PROCESS	GOBP_POSITIVE_REGULATION_OF_DNA_BIOSYNTHETIC_PROCESS		31	-0.501882	-1.79643	0.0149254	0.0378188	1	416	tags=52%, list=12%, signal=58%
GOCC_MITOCHONDRIAL_RESPIRATORY_CHAIN_COMPLEX_III	GOCC_MITOCHONDRIAL_RESPIRATORY_CHAIN_COMPLEX_III		11	-0.681263	-1.79314	0.00550964	0.0387667	1	612	tags=64%, list=18%, signal=78%
GOBP_POSITIVE_REGULATION_OF_CELL_CYCLE_G2_M_PHASE_TRANSITION	GOBP_POSITIVE_REGULATION_OF_CELL_CYCLE_G2_M_PHASE_TRANSITION		12	-0.638292	-1.79271	0.00552486	0.0387844	1	358	tags=50%, list=11%, signal=56%
GOBP_MITOCHONDRIAL_ELECTRON_TRANSPORT_UBIQUINOL_TO_CYTOCHROME_C	GOBP_MITOCHONDRIAL_ELECTRON_TRANSPORT_UBIQUINOL_TO_CYTOCHROME_C		11	-0.680254	-1.79212	0.013624	0.0388314	1	612	tags=64%, list=18%, signal=78%
GOBP_NEGATIVE_REGULATION_OF_GENE_EXPRESSION_VIA_CPG_ISLAND_METHYLATION	GOBP_NEGATIVE_REGULATION_OF_GENE_EXPRESSION_VIA_CPG_ISLAND_METHYLATION		5	-0.88699	-1.78945	0.00251889	0.0397378	1	249	tags=60%, list=7%, signal=65%
GOBP_ESTABLISHMENT_OF_PROTEIN_LOCALIZATION_TO_MITOCHONDRIAL_MEMBRANE	GOBP_ESTABLISHMENT_OF_PROTEIN_LOCALIZATION_TO_MITOCHONDRIAL_MEMBRANE		22	-0.546761	-1.7876	0.00330033	0.0401154	1	582	tags=50%, list=17%, signal=60%
GOCC_PRERIBOSOME_LARGE_SUBUNIT_PRECURSOR	GOCC_PRERIBOSOME_LARGE_SUBUNIT_PRECURSOR		7	-0.762376	-1.78783	0.00514139	0.0401933	1	522	tags=71%, list=16%, signal=84%
GOCC_NUCLEAR_PERIPHERY	GOCC_NUCLEAR_PERIPHERY		57	-0.440176	-1.78614	0.00478469	0.0405425	1	793	tags=42%, list=24%, signal=54%
GOBP_FOLIC_ACID_CONTAINING_COMPOUND_METABOLIC_PROCESS	GOBP_FOLIC_ACID_CONTAINING_COMPOUND_METABOLIC_PROCESS		9	-0.707828	-1.78536	0.00283286	0.040717	1	539	tags=67%, list=16%, signal=79%
GOCC_TELOMERASE_HOLOENZYME_COMPLEX	GOCC_TELOMERASE_HOLOENZYME_COMPLEX		9	-0.70688	-1.78322	0.008	0.0414413	1	412	tags=56%, list=12%, signal=63%
GOCC_SMALL_RIBOSOMAL_SUBUNIT	GOCC_SMALL_RIBOSOMAL_SUBUNIT		58	-0.426286	-1.78213	0	0.0418184	1	1032	tags=57%, list=31%, signal=81%
GOBP_POSITIVE_REGULATION_OF_PODOSOME_ASSEMBLY	GOBP_POSITIVE_REGULATION_OF_PODOSOME_ASSEMBLY		7	-0.759818	-1.77776	0.00787402	0.0434294	1	13	tags=29%, list=0%, signal=29%
GOBP_REGULATION_OF_MITOCHONDRIAL_GENE_EXPRESSION	GOBP_REGULATION_OF_MITOCHONDRIAL_GENE_EXPRESSION		8	-0.746632	-1.77469	0.00508906	0.0443352	1	661	tags=88%, list=20%, signal=109%
GOCC_CATALYTIC_STEP_2_SPLICEOSOME	GOCC_CATALYTIC_STEP_2_SPLICEOSOME		58	-0.429173	-1.77512	0.0049505	0.0443805	1	1006	tags=50%, list=30%, signal=70%
GOBP_REGULATION_OF_NUCLEOTIDE_METABOLIC_PROCESS	GOBP_REGULATION_OF_NUCLEOTIDE_METABOLIC_PROCESS		9	-0.698133	-1.77368	0.00547945	0.0445577	1	493	tags=44%, list=15%, signal=52%
GOMF_U6_SNRNA_BINDING	GOMF_U6_SNRNA_BINDING		8	-0.7274	-1.77061	0.00826446	0.0457636	1	679	tags=63%, list=20%, signal=78%
GOBP_MEIOTIC_CHROMOSOME_SEGREGATION	GOBP_MEIOTIC_CHROMOSOME_SEGREGATION		17	-0.586387	-1.7685	0.00895522	0.0460887	1	420	tags=41%, list=13%, signal=47%
GOMF_CATALYTIC_ACTIVITY_ACTING_ON_A_TRNA	GOMF_CATALYTIC_ACTIVITY_ACTING_ON_A_TRNA		17	-0.578851	-1.76944	0.00952381	0.0460919	1	1088	tags=71%, list=33%, signal=104%
GOBP_DETOXIFICATION	GOBP_DETOXIFICATION		35	-0.467634	-1.76878	0.003663	0.0461744	1	575	tags=37%, list=17%, signal=44%
GOBP_NADP_METABOLIC_PROCESS	GOBP_NADP_METABOLIC_PROCESS		11	-0.661279	-1.76765	0.010929	0.0463344	1	956	tags=73%, list=29%, signal=102%
GOCC_DYNEIN_AXONEMAL_PARTICLE	GOCC_DYNEIN_AXONEMAL_PARTICLE		5	-0.855559	-1.76676	0.00480769	0.0465853	1	488	tags=100%, list=15%, signal=117%
GOBP_MEIOTIC_CELL_CYCLE	GOBP_MEIOTIC_CELL_CYCLE		56	-0.421434	-1.76584	0	0.046647	1	337	tags=30%, list=10%, signal=33%
GOBP_NEGATIVE_REGULATION_OF_CELL_CYCLE_PROCESS	GOBP_NEGATIVE_REGULATION_OF_CELL_CYCLE_PROCESS		93	-0.392641	-1.76597	0	0.0467883	1	678	tags=39%, list=20%, signal=47%
GOCC_ANAPHASE_PROMOTING_COMPLEX	GOCC_ANAPHASE_PROMOTING_COMPLEX		8	-0.735285	-1.76452	0.0153061	0.0470983	1	337	tags=50%, list=10%, signal=55%
GOBP_RECOMBINATIONAL_REPAIR	GOBP_RECOMBINATIONAL_REPAIR		56	-0.431169	-1.76346	0	0.0474099	1	264	tags=25%, list=8%, signal=27%
GOBP_REGULATION_OF_CYTOKINESIS	GOBP_REGULATION_OF_CYTOKINESIS		22	-0.542292	-1.76295	0.00325733	0.0474848	1	112	tags=23%, list=3%, signal=23%
GOBP_AMINO_ACID_METABOLIC_PROCESS	GOBP_AMINO_ACID_METABOLIC_PROCESS		39	-0.457657	-1.76156	0	0.0478621	1	998	tags=59%, list=30%, signal=83%
GOCC_LSM2_8_COMPLEX	GOCC_LSM2_8_COMPLEX		7	-0.771275	-1.75819	0.0129199	0.049307	1	730	tags=86%, list=22%, signal=109%
GOMF_NUCLEOBASE_CONTAINING_COMPOUND_KINASE_ACTIVITY	GOMF_NUCLEOBASE_CONTAINING_COMPOUND_KINASE_ACTIVITY		15	-0.62753	-1.75727	0.015625	0.0495565	1	346	tags=33%, list=10%, signal=37%
GOBP_REGULATION_OF_PODOSOME_ASSEMBLY	GOBP_REGULATION_OF_PODOSOME_ASSEMBLY		7	-0.759818	-1.75656	0.0134771	0.0497077	1	13	tags=29%, list=0%, signal=29%

## Sheet: gsea_report_for_pos_NR.tsv
NAME	GS<br> follow link to MSigDB	GS DETAILS	SIZE	ES	NES	NOM p-val	FDR q-val	FWER p-val	RANK AT MAX	LEADING EDGE
GOBP_NATURAL_KILLER_CELL_MEDIATED_IMMUNITY	GOBP_NATURAL_KILLER_CELL_MEDIATED_IMMUNITY	Details ...	41	0.733744	2.18569	0	0	0	223	tags=46%, list=7%, signal=49%
GOCC_EXTERNAL_SIDE_OF_PLASMA_MEMBRANE	GOCC_EXTERNAL_SIDE_OF_PLASMA_MEMBRANE	Details ...	91	0.629724	2.09311	0	0.000560224	0.004	360	tags=43%, list=11%, signal=47%
GOBP_REGULATION_OF_NATURAL_KILLER_CELL_MEDIATED_IMMUNITY	GOBP_REGULATION_OF_NATURAL_KILLER_CELL_MEDIATED_IMMUNITY	Details ...	25	0.781177	2.10297	0	0.000589924	0.003	213	tags=52%, list=6%, signal=55%
GOBP_POSITIVE_REGULATION_OF_NATURAL_KILLER_CELL_MEDIATED_IMMUNITY	GOBP_POSITIVE_REGULATION_OF_NATURAL_KILLER_CELL_MEDIATED_IMMUNITY	Details ...	17	0.81479	2.08347	0	0.000651616	0.006	301	tags=65%, list=9%, signal=71%
GOBP_REGULATION_OF_LEUKOCYTE_MEDIATED_CYTOTOXICITY	GOBP_REGULATION_OF_LEUKOCYTE_MEDIATED_CYTOTOXICITY	Details ...	36	0.718374	2.0981	0	0.000653595	0.004	301	tags=44%, list=9%, signal=48%
GOBP_LEUKOCYTE_MEDIATED_CYTOTOXICITY	GOBP_LEUKOCYTE_MEDIATED_CYTOTOXICITY	Details ...	58	0.658201	2.08884	0	0.000733068	0.006	301	tags=40%, list=9%, signal=43%
GOBP_NATURAL_KILLER_CELL_ACTIVATION	GOBP_NATURAL_KILLER_CELL_ACTIVATION	Details ...	34	0.735273	2.10328	0	0.000737405	0.003	426	tags=56%, list=13%, signal=63%
GOBP_INNATE_IMMUNE_RESPONSE_ACTIVATING_CELL_SURFACE_RECEPTOR_SIGNALING_PATHWAY	GOBP_INNATE_IMMUNE_RESPONSE_ACTIVATING_CELL_SURFACE_RECEPTOR_SIGNALING_PATHWAY	Details ...	24	0.780332	2.11017	0	0.000983206	0.003	525	tags=63%, list=16%, signal=74%
GOBP_POSITIVE_REGULATION_OF_CELL_KILLING	GOBP_POSITIVE_REGULATION_OF_CELL_KILLING	Details ...	28	0.723199	2.04787	0	0.0013754	0.013	476	tags=54%, list=14%, signal=62%
GOBP_CELL_KILLING	GOBP_CELL_KILLING	Details ...	74	0.628686	2.03819	0	0.00142885	0.015	476	tags=45%, list=14%, signal=51%
GOBP_REGULATION_OF_NATURAL_KILLER_CELL_ACTIVATION	GOBP_REGULATION_OF_NATURAL_KILLER_CELL_ACTIVATION	Details ...	17	0.839038	2.11335	0	0.00147481	0.003	301	tags=65%, list=9%, signal=71%
GOBP_CELLULAR_DEFENSE_RESPONSE	GOBP_CELLULAR_DEFENSE_RESPONSE	Details ...	19	0.785149	2.03214	0	0.00147484	0.017	478	tags=79%, list=14%, signal=92%
GOBP_REGULATION_OF_CELL_KILLING	GOBP_REGULATION_OF_CELL_KILLING	Details ...	41	0.672755	2.01248	0	0.00234318	0.03	301	tags=41%, list=9%, signal=45%
GOBP_ACTIVATION_OF_INNATE_IMMUNE_RESPONSE	GOBP_ACTIVATION_OF_INNATE_IMMUNE_RESPONSE	Details ...	94	0.5958	1.98231	0	0.00463055	0.064	548	tags=38%, list=16%, signal=45%
GOBP_FC_RECEPTOR_MEDIATED_STIMULATORY_SIGNALING_PATHWAY	GOBP_FC_RECEPTOR_MEDIATED_STIMULATORY_SIGNALING_PATHWAY	Details ...	12	0.839939	1.97424	0	0.00530242	0.078	364	tags=58%, list=11%, signal=65%
GOBP_FAT_CELL_DIFFERENTIATION	GOBP_FAT_CELL_DIFFERENTIATION	Details ...	45	0.647982	1.96965	0	0.00533757	0.081	442	tags=44%, list=13%, signal=51%
GOBP_POST_EMBRYONIC_DEVELOPMENT	GOBP_POST_EMBRYONIC_DEVELOPMENT	Details ...	32	0.673848	1.96593	0	0.00542807	0.088	893	tags=78%, list=27%, signal=106%
GOMF_ANTIGEN_BINDING	GOMF_ANTIGEN_BINDING	Details ...	42	0.655979	1.9561	0	0.00665232	0.109	476	tags=36%, list=14%, signal=41%
GOBP_NEGATIVE_REGULATION_OF_NATURAL_KILLER_CELL_MEDIATED_IMMUNITY	GOBP_NEGATIVE_REGULATION_OF_NATURAL_KILLER_CELL_MEDIATED_IMMUNITY	Details ...	12	0.813691	1.94732	0	0.00759776	0.132	517	tags=75%, list=15%, signal=88%
GOMF_IMMUNE_RECEPTOR_ACTIVITY	GOMF_IMMUNE_RECEPTOR_ACTIVITY	Details ...	31	0.691273	1.94291	0	0.00810056	0.147	268	tags=45%, list=8%, signal=49%
GOBP_REGULATION_OF_ERBB_SIGNALING_PATHWAY	GOBP_REGULATION_OF_ERBB_SIGNALING_PATHWAY		21	0.748006	1.94092	0	0.00822904	0.155	193	tags=33%, list=6%, signal=35%
GOMF_PHOSPHOTYROSINE_RESIDUE_BINDING	GOMF_PHOSPHOTYROSINE_RESIDUE_BINDING		17	0.757369	1.93002	0	0.0093892	0.209	364	tags=47%, list=11%, signal=53%
GOBP_NEURON_MIGRATION	GOBP_NEURON_MIGRATION		29	0.695149	1.93032	0	0.00969893	0.207	608	tags=59%, list=18%, signal=71%
GOBP_FC_GAMMA_RECEPTOR_SIGNALING_PATHWAY	GOBP_FC_GAMMA_RECEPTOR_SIGNALING_PATHWAY		11	0.84887	1.93114	0	0.00982033	0.2	364	tags=64%, list=11%, signal=71%
GOBP_REGULATION_OF_NEURAL_PRECURSOR_CELL_PROLIFERATION	GOBP_REGULATION_OF_NEURAL_PRECURSOR_CELL_PROLIFERATION		17	0.763876	1.93145	0	0.0101774	0.198	392	tags=47%, list=12%, signal=53%
GOBP_POSITIVE_REGULATION_OF_NEURAL_PRECURSOR_CELL_PROLIFERATION	GOBP_POSITIVE_REGULATION_OF_NEURAL_PRECURSOR_CELL_PROLIFERATION		10	0.869687	1.92366	0	0.0103116	0.237	247	tags=50%, list=7%, signal=54%
GOBP_NEGATIVE_REGULATION_OF_IMMUNE_EFFECTOR_PROCESS	GOBP_NEGATIVE_REGULATION_OF_IMMUNE_EFFECTOR_PROCESS		42	0.627701	1.91298	0	0.0123024	0.288	551	tags=45%, list=16%, signal=53%
GOBP_DETECTION_OF_STIMULUS	GOBP_DETECTION_OF_STIMULUS		17	0.763528	1.90495	0.00134953	0.0137564	0.322	247	tags=41%, list=7%, signal=44%
GOBP_RESPONSE_TO_LECTIN	GOBP_RESPONSE_TO_LECTIN		9	0.877796	1.89363	0	0.0160668	0.389	93	tags=67%, list=3%, signal=68%
GOMF_CARBOHYDRATE_BINDING	GOMF_CARBOHYDRATE_BINDING		41	0.621276	1.89441	0	0.0162415	0.385	317	tags=32%, list=9%, signal=35%
GOBP_FC_RECEPTOR_SIGNALING_PATHWAY	GOBP_FC_RECEPTOR_SIGNALING_PATHWAY		14	0.779507	1.89122	0	0.0163922	0.404	364	tags=57%, list=11%, signal=64%
GOBP_REGULATION_OF_LYMPHOCYTE_MEDIATED_IMMUNITY	GOBP_REGULATION_OF_LYMPHOCYTE_MEDIATED_IMMUNITY		63	0.593411	1.89552	0	0.0163947	0.375	344	tags=32%, list=10%, signal=35%
GOMF_CORECEPTOR_ACTIVITY	GOMF_CORECEPTOR_ACTIVITY		12	0.800348	1.88771	0	0.01664	0.418	254	tags=67%, list=8%, signal=72%
GOBP_POSITIVE_REGULATION_OF_LYMPHOCYTE_MEDIATED_IMMUNITY	GOBP_POSITIVE_REGULATION_OF_LYMPHOCYTE_MEDIATED_IMMUNITY		46	0.625675	1.88281	0	0.017824	0.452	344	tags=33%, list=10%, signal=36%
GOBP_TUMOR_NECROSIS_FACTOR_SUPERFAMILY_CYTOKINE_PRODUCTION	GOBP_TUMOR_NECROSIS_FACTOR_SUPERFAMILY_CYTOKINE_PRODUCTION		51	0.607999	1.87248	0	0.019801	0.513	457	tags=31%, list=14%, signal=36%
GOBP_CELL_FATE_COMMITMENT	GOBP_CELL_FATE_COMMITMENT		38	0.63043	1.8694	0.00239521	0.0198178	0.536	660	tags=42%, list=20%, signal=52%
GOBP_EXOCYTOSIS	GOBP_EXOCYTOSIS		76	0.571483	1.87292	0	0.020133	0.509	698	tags=42%, list=21%, signal=52%
GOBP_NEGATIVE_REGULATION_OF_LEUKOCYTE_MEDIATED_IMMUNITY	GOBP_NEGATIVE_REGULATION_OF_LEUKOCYTE_MEDIATED_IMMUNITY		28	0.673851	1.86959	0	0.0202621	0.534	517	tags=50%, list=15%, signal=59%
GOBP_NEGATIVE_REGULATION_OF_LYMPHOCYTE_MEDIATED_IMMUNITY	GOBP_NEGATIVE_REGULATION_OF_LYMPHOCYTE_MEDIATED_IMMUNITY		24	0.683288	1.86388	0.0013089	0.0205518	0.572	517	tags=54%, list=15%, signal=64%
GOBP_CALCIUM_MEDIATED_SIGNALING	GOBP_CALCIUM_MEDIATED_SIGNALING		48	0.605062	1.87322	0	0.0205966	0.509	584	tags=40%, list=17%, signal=47%
GOBP_NEGATIVE_REGULATION_OF_DEFENSE_RESPONSE	GOBP_NEGATIVE_REGULATION_OF_DEFENSE_RESPONSE		92	0.560891	1.86391	0	0.021029	0.571	548	tags=37%, list=16%, signal=43%
GOMF_PROTEIN_TYROSINE_PHOSPHATASE_ACTIVITY	GOMF_PROTEIN_TYROSINE_PHOSPHATASE_ACTIVITY		28	0.661525	1.86541	0.00125945	0.0211126	0.563	305	tags=43%, list=9%, signal=47%
GOBP_REGULATED_EXOCYTOSIS	GOBP_REGULATED_EXOCYTOSIS		46	0.609669	1.85704	0	0.0224528	0.616	698	tags=46%, list=21%, signal=57%
GOMF_MHC_PROTEIN_COMPLEX_BINDING	GOMF_MHC_PROTEIN_COMPLEX_BINDING		25	0.682607	1.85723	0	0.0229521	0.615	151	tags=20%, list=5%, signal=21%
GOBP_NATURAL_KILLER_CELL_CHEMOTAXIS	GOBP_NATURAL_KILLER_CELL_CHEMOTAXIS		7	0.907427	1.85015	0	0.025232	0.667	227	tags=71%, list=7%, signal=76%
GOBP_REGULATION_OF_LEUKOCYTE_MEDIATED_IMMUNITY	GOBP_REGULATION_OF_LEUKOCYTE_MEDIATED_IMMUNITY		76	0.566594	1.84774	0	0.0256473	0.685	301	tags=28%, list=9%, signal=30%
GOMF_G_PROTEIN_ALPHA_SUBUNIT_BINDING	GOMF_G_PROTEIN_ALPHA_SUBUNIT_BINDING		10	0.813368	1.84413	0	0.0258169	0.709	157	tags=40%, list=5%, signal=42%
GOBP_DEPHOSPHORYLATION	GOBP_DEPHOSPHORYLATION		94	0.550122	1.84574	0	0.0261231	0.697	698	tags=41%, list=21%, signal=51%
GOBP_VENTRICULAR_CARDIAC_MUSCLE_TISSUE_DEVELOPMENT	GOBP_VENTRICULAR_CARDIAC_MUSCLE_TISSUE_DEVELOPMENT		8	0.876448	1.84451	0	0.0261304	0.705	188	tags=63%, list=6%, signal=66%
GOBP_REGULATION_OF_SMALL_GTPASE_MEDIATED_SIGNAL_TRANSDUCTION	GOBP_REGULATION_OF_SMALL_GTPASE_MEDIATED_SIGNAL_TRANSDUCTION		73	0.563556	1.83778	0	0.0286199	0.748	848	tags=52%, list=25%, signal=68%
GOBP_VENTRICULAR_CARDIAC_MUSCLE_TISSUE_MORPHOGENESIS	GOBP_VENTRICULAR_CARDIAC_MUSCLE_TISSUE_MORPHOGENESIS		6	0.924554	1.8366	0	0.0286928	0.759	184	tags=67%, list=6%, signal=70%
GOMF_MHC_CLASS_IB_RECEPTOR_ACTIVITY	GOMF_MHC_CLASS_IB_RECEPTOR_ACTIVITY		5	0.98142	1.83295	0	0.029671	0.774	66	tags=100%, list=2%, signal=102%
GOMF_G_PROTEIN_COUPLED_RECEPTOR_ACTIVITY	GOMF_G_PROTEIN_COUPLED_RECEPTOR_ACTIVITY		22	0.679344	1.82883	0	0.0317055	0.81	254	tags=45%, list=8%, signal=49%
GOBP_REGULATION_OF_OSTEOCLAST_DIFFERENTIATION	GOBP_REGULATION_OF_OSTEOCLAST_DIFFERENTIATION		16	0.728059	1.82351	0	0.0324419	0.843	794	tags=88%, list=24%, signal=114%
GOBP_IMMUNE_RESPONSE_REGULATING_CELL_SURFACE_RECEPTOR_SIGNALING_PATHWAY_INVOLVED_IN_PHAGOCYTOSIS	GOBP_IMMUNE_RESPONSE_REGULATING_CELL_SURFACE_RECEPTOR_SIGNALING_PATHWAY_INVOLVED_IN_PHAGOCYTOSIS		8	0.867941	1.82438	0.00150602	0.0326699	0.839	364	tags=75%, list=11%, signal=84%
GOBP_VASCULOGENESIS	GOBP_VASCULOGENESIS		18	0.711498	1.82469	0.00137174	0.0329963	0.837	864	tags=78%, list=26%, signal=104%
GOBP_NEGATIVE_REGULATION_OF_ERBB_SIGNALING_PATHWAY	GOBP_NEGATIVE_REGULATION_OF_ERBB_SIGNALING_PATHWAY		13	0.756212	1.82059	0.00140252	0.033541	0.854	193	tags=31%, list=6%, signal=33%
GOBP_REGULATION_OF_B_CELL_DIFFERENTIATION	GOBP_REGULATION_OF_B_CELL_DIFFERENTIATION		13	0.756492	1.82472	0	0.0336073	0.837	290	tags=62%, list=9%, signal=67%
GOBP_SENSORY_PERCEPTION_OF_PAIN	GOBP_SENSORY_PERCEPTION_OF_PAIN		9	0.838305	1.81586	0	0.0337019	0.878	183	tags=56%, list=5%, signal=59%
GOBP_POSITIVE_REGULATION_OF_LEUKOCYTE_MEDIATED_IMMUNITY	GOBP_POSITIVE_REGULATION_OF_LEUKOCYTE_MEDIATED_IMMUNITY		50	0.593541	1.81953	0	0.0337053	0.861	344	tags=30%, list=10%, signal=33%
GOMF_PROTEIN_TYROSINE_KINASE_ACTIVITY	GOMF_PROTEIN_TYROSINE_KINASE_ACTIVITY		24	0.666705	1.8148	0.00128535	0.0337128	0.881	568	tags=46%, list=17%, signal=55%
GOBP_SYNAPTIC_SIGNALING	GOBP_SYNAPTIC_SIGNALING		96	0.545361	1.81663	0	0.0337211	0.874	1018	tags=55%, list=30%, signal=77%
GOMF_PROTEIN_PHOSPHORYLATED_AMINO_ACID_BINDING	GOMF_PROTEIN_PHOSPHORYLATED_AMINO_ACID_BINDING		22	0.678264	1.81816	0.00129534	0.033896	0.868	364	tags=36%, list=11%, signal=41%
GOBP_SECOND_MESSENGER_MEDIATED_SIGNALING	GOBP_SECOND_MESSENGER_MEDIATED_SIGNALING		58	0.58017	1.81317	0.00112233	0.0340704	0.888	292	tags=26%, list=9%, signal=28%
GOBP_NEGATIVE_REGULATION_OF_INNATE_IMMUNE_RESPONSE	GOBP_NEGATIVE_REGULATION_OF_INNATE_IMMUNE_RESPONSE		40	0.61089	1.81694	0.00121951	0.0341606	0.873	517	tags=30%, list=15%, signal=35%
GOMF_GTPASE_ACTIVATOR_ACTIVITY	GOMF_GTPASE_ACTIVATOR_ACTIVITY		64	0.568482	1.81078	0	0.0350577	0.9	630	tags=45%, list=19%, signal=55%
GOBP_REGULATION_OF_RAS_PROTEIN_SIGNAL_TRANSDUCTION	GOBP_REGULATION_OF_RAS_PROTEIN_SIGNAL_TRANSDUCTION		46	0.593559	1.80921	0	0.035663	0.911	848	tags=52%, list=25%, signal=69%
GOBP_CARDIAC_EPITHELIAL_TO_MESENCHYMAL_TRANSITION	GOBP_CARDIAC_EPITHELIAL_TO_MESENCHYMAL_TRANSITION		7	0.892084	1.80727	0	0.0359108	0.92	249	tags=71%, list=7%, signal=77%
GOBP_REGULATION_OF_NATURAL_KILLER_CELL_CHEMOTAXIS	GOBP_REGULATION_OF_NATURAL_KILLER_CELL_CHEMOTAXIS		5	0.956371	1.80769	0	0.0361792	0.92	66	tags=80%, list=2%, signal=81%
GOMF_MHC_PROTEIN_BINDING	GOMF_MHC_PROTEIN_BINDING		25	0.659663	1.80295	0.00258732	0.0381808	0.933	301	tags=32%, list=9%, signal=35%
GOBP_REGULATION_OF_NEURON_DIFFERENTIATION	GOBP_REGULATION_OF_NEURON_DIFFERENTIATION		26	0.645014	1.79675	0.00126263	0.0418389	0.958	645	tags=50%, list=19%, signal=61%
GOBP_NEGATIVE_REGULATION_OF_CELL_ACTIVATION	GOBP_NEGATIVE_REGULATION_OF_CELL_ACTIVATION		59	0.570285	1.79125	0	0.0431436	0.966	566	tags=47%, list=17%, signal=56%
GOBP_SENSORY_SYSTEM_DEVELOPMENT	GOBP_SENSORY_SYSTEM_DEVELOPMENT		47	0.584082	1.7937	0.00229621	0.0432621	0.964	853	tags=55%, list=26%, signal=73%
GOMF_PROTEIN_ANTIGEN_BINDING	GOMF_PROTEIN_ANTIGEN_BINDING		5	0.962507	1.7915	0	0.0435012	0.966	7	tags=60%, list=0%, signal=60%
GOBP_CIRCULATORY_SYSTEM_PROCESS	GOBP_CIRCULATORY_SYSTEM_PROCESS		89	0.53194	1.79151	0	0.0440704	0.966	443	tags=29%, list=13%, signal=33%
GOBP_G_PROTEIN_COUPLED_RECEPTOR_SIGNALING_PATHWAY	GOBP_G_PROTEIN_COUPLED_RECEPTOR_SIGNALING_PATHWAY		99	0.538952	1.78931	0	0.044076	0.969	631	tags=38%, list=19%, signal=46%
GOBP_NEGATIVE_REGULATION_OF_INFLAMMATORY_RESPONSE	GOBP_NEGATIVE_REGULATION_OF_INFLAMMATORY_RESPONSE		43	0.591151	1.78478	0	0.0462726	0.977	364	tags=37%, list=11%, signal=41%
GOBP_CELL_FATE_SPECIFICATION	GOBP_CELL_FATE_SPECIFICATION		14	0.746244	1.78489	0.00286123	0.0468228	0.977	625	tags=50%, list=19%, signal=61%
GOBP_RELEASE_OF_SEQUESTERED_CALCIUM_ION_INTO_CYTOSOL_BY_ENDOPLASMIC_RETICULUM	GOBP_RELEASE_OF_SEQUESTERED_CALCIUM_ION_INTO_CYTOSOL_BY_ENDOPLASMIC_RETICULUM		10	0.804482	1.78176	0	0.0483344	0.981	275	tags=40%, list=8%, signal=43%
GOBP_B_CELL_DIFFERENTIATION	GOBP_B_CELL_DIFFERENTIATION		53	0.57764	1.78069	0.00114286	0.0483688	0.982	520	tags=43%, list=16%, signal=51%
GOMF_MHC_CLASS_I_PROTEIN_COMPLEX_BINDING	GOMF_MHC_CLASS_I_PROTEIN_COMPLEX_BINDING		5	0.935706	1.77925	0	0.04879	0.983	151	tags=80%, list=5%, signal=84%

## Sheet: gsea_report_for__pos_R.tsv
NAME	GS<br> follow link to MSigDB	GS DETAILS	SIZE	ES	NES	NOM p-val	FDR q-val	FWER p-val	RANK AT MAX	LEADING EDGE
GOBP_NATURAL_KILLER_CELL_MEDIATED_IMMUNITY	GOBP_NATURAL_KILLER_CELL_MEDIATED_IMMUNITY	Details ...	41	0.717006	2.26877	0	0	0	258	tags=49%, list=8%, signal=52%
GOBP_REGULATION_OF_NATURAL_KILLER_CELL_MEDIATED_IMMUNITY	GOBP_REGULATION_OF_NATURAL_KILLER_CELL_MEDIATED_IMMUNITY	Details ...	25	0.783895	2.24171	0	0	0	213	tags=52%, list=6%, signal=55%
GOBP_REGULATION_OF_NATURAL_KILLER_CELL_ACTIVATION	GOBP_REGULATION_OF_NATURAL_KILLER_CELL_ACTIVATION	Details ...	17	0.858273	2.21628	0	0	0	246	tags=71%, list=7%, signal=76%
GOBP_REGULATION_OF_LEUKOCYTE_MEDIATED_CYTOTOXICITY	GOBP_REGULATION_OF_LEUKOCYTE_MEDIATED_CYTOTOXICITY	Details ...	36	0.706507	2.20243	0	0	0	213	tags=39%, list=6%, signal=41%
GOMF_ANTIGEN_BINDING	GOMF_ANTIGEN_BINDING	Details ...	42	0.676246	2.13211	0	0.00012572	0.001	213	tags=31%, list=6%, signal=33%
GOCC_EXTERNAL_SIDE_OF_PLASMA_MEMBRANE	GOCC_EXTERNAL_SIDE_OF_PLASMA_MEMBRANE	Details ...	91	0.604277	2.13883	0	0.00014368	0.001	289	tags=40%, list=9%, signal=42%
GOBP_NATURAL_KILLER_CELL_ACTIVATION	GOBP_NATURAL_KILLER_CELL_ACTIVATION	Details ...	34	0.720884	2.14612	0	0.000167626	0.001	487	tags=59%, list=15%, signal=68%
GOBP_POSITIVE_REGULATION_OF_NATURAL_KILLER_CELL_MEDIATED_IMMUNITY	GOBP_POSITIVE_REGULATION_OF_NATURAL_KILLER_CELL_MEDIATED_IMMUNITY	Details ...	17	0.822091	2.15394	0	0.000201151	0.001	213	tags=59%, list=6%, signal=63%
GOBP_INNATE_IMMUNE_RESPONSE_ACTIVATING_CELL_SURFACE_RECEPTOR_SIGNALING_PATHWAY	GOBP_INNATE_IMMUNE_RESPONSE_ACTIVATING_CELL_SURFACE_RECEPTOR_SIGNALING_PATHWAY	Details ...	24	0.740911	2.10514	0	0.00088314	0.008	195	tags=42%, list=6%, signal=44%
GOBP_LEUKOCYTE_MEDIATED_CYTOTOXICITY	GOBP_LEUKOCYTE_MEDIATED_CYTOTOXICITY	Details ...	58	0.6354	2.09038	0	0.00129146	0.012	258	tags=38%, list=8%, signal=40%
GOBP_CELLULAR_DEFENSE_RESPONSE	GOBP_CELLULAR_DEFENSE_RESPONSE	Details ...	19	0.781807	2.08233	0	0.00135453	0.014	603	tags=79%, list=18%, signal=96%
GOBP_POSITIVE_REGULATION_OF_CELL_KILLING	GOBP_POSITIVE_REGULATION_OF_CELL_KILLING	Details ...	28	0.717957	2.08054	0	0.00140481	0.016	663	tags=64%, list=20%, signal=80%
GOBP_REGULATION_OF_CELL_KILLING	GOBP_REGULATION_OF_CELL_KILLING	Details ...	41	0.657731	2.06097	0	0.00206146	0.026	220	tags=39%, list=7%, signal=41%
GOBP_TUMOR_NECROSIS_FACTOR_SUPERFAMILY_CYTOKINE_PRODUCTION	GOBP_TUMOR_NECROSIS_FACTOR_SUPERFAMILY_CYTOKINE_PRODUCTION	Details ...	51	0.625483	2.04637	0	0.00248176	0.034	558	tags=39%, list=17%, signal=46%
GOBP_CELL_KILLING	GOBP_CELL_KILLING	Details ...	74	0.592088	2.04075	0	0.00257841	0.038	507	tags=46%, list=15%, signal=53%
GOMF_IMMUNE_RECEPTOR_ACTIVITY	GOMF_IMMUNE_RECEPTOR_ACTIVITY	Details ...	31	0.672458	2.00931	0	0.00464572	0.07	228	tags=42%, list=7%, signal=45%
GOMF_G_PROTEIN_COUPLED_RECEPTOR_ACTIVITY	GOMF_G_PROTEIN_COUPLED_RECEPTOR_ACTIVITY	Details ...	22	0.732901	2.0056	0	0.00478031	0.077	236	tags=50%, list=7%, signal=53%
GOBP_RESPONSE_TO_LECTIN	GOBP_RESPONSE_TO_LECTIN		9	0.87011	1.99049	0	0.00486701	0.103	161	tags=67%, list=5%, signal=70%
GOCC_T_CELL_RECEPTOR_COMPLEX	GOCC_T_CELL_RECEPTOR_COMPLEX		48	0.619759	1.99253	0.00124224	0.00490886	0.099	969	tags=75%, list=29%, signal=104%
GOBP_FAT_CELL_DIFFERENTIATION	GOBP_FAT_CELL_DIFFERENTIATION	Details ...	45	0.62613	1.994	0	0.00500596	0.096	686	tags=49%, list=21%, signal=61%
GOBP_POST_EMBRYONIC_DEVELOPMENT	GOBP_POST_EMBRYONIC_DEVELOPMENT	Details ...	32	0.652697	1.99427	0	0.00526943	0.096	789	tags=66%, list=24%, signal=85%
GOCC_RECEPTOR_COMPLEX	GOCC_RECEPTOR_COMPLEX	Details ...	90	0.556322	1.99461	0	0.00550651	0.095	702	tags=52%, list=21%, signal=64%
GOBP_FC_RECEPTOR_MEDIATED_STIMULATORY_SIGNALING_PATHWAY	GOBP_FC_RECEPTOR_MEDIATED_STIMULATORY_SIGNALING_PATHWAY		12	0.809116	1.97601	0	0.00646899	0.144	379	tags=58%, list=11%, signal=66%
GOBP_ALPHA_BETA_T_CELL_ACTIVATION	GOBP_ALPHA_BETA_T_CELL_ACTIVATION		83	0.555982	1.97344	0	0.00669548	0.154	842	tags=59%, list=25%, signal=77%
GOBP_NEGATIVE_REGULATION_OF_LEUKOCYTE_MEDIATED_IMMUNITY	GOBP_NEGATIVE_REGULATION_OF_LEUKOCYTE_MEDIATED_IMMUNITY		28	0.674089	1.97148	0	0.00670537	0.16	513	tags=50%, list=15%, signal=59%
GOBP_NEGATIVE_REGULATION_OF_IMMUNE_EFFECTOR_PROCESS	GOBP_NEGATIVE_REGULATION_OF_IMMUNE_EFFECTOR_PROCESS		42	0.622042	1.96767	0	0.00709579	0.174	692	tags=52%, list=21%, signal=65%
GOMF_CORECEPTOR_ACTIVITY	GOMF_CORECEPTOR_ACTIVITY		12	0.822104	1.95835	0	0.00856294	0.213	289	tags=67%, list=9%, signal=73%
GOBP_REGULATION_OF_LYMPHOCYTE_MEDIATED_IMMUNITY	GOBP_REGULATION_OF_LYMPHOCYTE_MEDIATED_IMMUNITY		63	0.577946	1.95329	0	0.00889465	0.229	663	tags=46%, list=20%, signal=56%
GOBP_FC_RECEPTOR_SIGNALING_PATHWAY	GOBP_FC_RECEPTOR_SIGNALING_PATHWAY		14	0.762305	1.92209	0	0.0144497	0.375	379	tags=57%, list=11%, signal=64%
GOBP_ADENYLATE_CYCLASE_MODULATING_G_PROTEIN_COUPLED_RECEPTOR_SIGNALING_PATHWAY	GOBP_ADENYLATE_CYCLASE_MODULATING_G_PROTEIN_COUPLED_RECEPTOR_SIGNALING_PATHWAY		30	0.644261	1.92651	0	0.0144729	0.351	528	tags=43%, list=16%, signal=51%
GOMF_DNA_BINDING_TRANSCRIPTION_ACTIVATOR_ACTIVITY	GOMF_DNA_BINDING_TRANSCRIPTION_ACTIVATOR_ACTIVITY		64	0.569708	1.9245	0	0.0147179	0.367	898	tags=66%, list=27%, signal=88%
GOBP_POSITIVE_REGULATION_OF_INTERLEUKIN_8_PRODUCTION	GOBP_POSITIVE_REGULATION_OF_INTERLEUKIN_8_PRODUCTION		14	0.76077	1.92274	0	0.0147221	0.373	341	tags=43%, list=10%, signal=48%
GOBP_NEGATIVE_REGULATION_OF_LYMPHOCYTE_MEDIATED_IMMUNITY	GOBP_NEGATIVE_REGULATION_OF_LYMPHOCYTE_MEDIATED_IMMUNITY		24	0.670169	1.90743	0	0.015402	0.46	663	tags=58%, list=20%, signal=72%
GOBP_G_PROTEIN_COUPLED_RECEPTOR_SIGNALING_PATHWAY	GOBP_G_PROTEIN_COUPLED_RECEPTOR_SIGNALING_PATHWAY		99	0.532142	1.90778	0	0.0157549	0.459	539	tags=34%, list=16%, signal=40%
GOBP_SECOND_MESSENGER_MEDIATED_SIGNALING	GOBP_SECOND_MESSENGER_MEDIATED_SIGNALING		58	0.566681	1.90058	0	0.0158366	0.504	768	tags=43%, list=23%, signal=55%
GOBP_POSITIVE_REGULATION_OF_LYMPHOCYTE_MEDIATED_IMMUNITY	GOBP_POSITIVE_REGULATION_OF_LYMPHOCYTE_MEDIATED_IMMUNITY		46	0.588168	1.91093	0.00131062	0.0161375	0.441	772	tags=54%, list=23%, signal=70%
GOBP_FC_GAMMA_RECEPTOR_SIGNALING_PATHWAY	GOBP_FC_GAMMA_RECEPTOR_SIGNALING_PATHWAY		11	0.818096	1.90795	0	0.0161538	0.458	379	tags=64%, list=11%, signal=72%
GOBP_REGULATION_OF_LEUKOCYTE_MEDIATED_IMMUNITY	GOBP_REGULATION_OF_LEUKOCYTE_MEDIATED_IMMUNITY		76	0.543238	1.90193	0	0.0161988	0.494	663	tags=43%, list=20%, signal=53%
GOBP_ACTIVATION_OF_INNATE_IMMUNE_RESPONSE	GOBP_ACTIVATION_OF_INNATE_IMMUNE_RESPONSE		94	0.523819	1.90065	0	0.0162137	0.504	332	tags=26%, list=10%, signal=28%
GOBP_ALPHA_BETA_T_CELL_DIFFERENTIATION	GOBP_ALPHA_BETA_T_CELL_DIFFERENTIATION		53	0.587822	1.90903	0	0.0164074	0.456	831	tags=60%, list=25%, signal=79%
GOBP_POSITIVE_REGULATION_OF_IMMUNE_EFFECTOR_PROCESS	GOBP_POSITIVE_REGULATION_OF_IMMUNE_EFFECTOR_PROCESS		81	0.538228	1.91174	0	0.0164363	0.439	663	tags=46%, list=20%, signal=56%
GOBP_NEGATIVE_REGULATION_OF_MAP_KINASE_ACTIVITY	GOBP_NEGATIVE_REGULATION_OF_MAP_KINASE_ACTIVITY		15	0.757108	1.89649	0.0015456	0.0164681	0.531	350	tags=60%, list=10%, signal=67%
GOMF_PHOSPHOTYROSINE_RESIDUE_BINDING	GOMF_PHOSPHOTYROSINE_RESIDUE_BINDING		17	0.723477	1.90254	0	0.0164803	0.491	507	tags=53%, list=15%, signal=62%
GOMF_GTPASE_ACTIVATOR_ACTIVITY	GOMF_GTPASE_ACTIVATOR_ACTIVITY		64	0.574515	1.91265	0	0.0166928	0.432	831	tags=52%, list=25%, signal=67%
GOBP_POSITIVE_REGULATION_OF_TUMOR_NECROSIS_FACTOR_SUPERFAMILY_CYTOKINE_PRODUCTION	GOBP_POSITIVE_REGULATION_OF_TUMOR_NECROSIS_FACTOR_SUPERFAMILY_CYTOKINE_PRODUCTION		31	0.630072	1.89201	0	0.016789	0.552	558	tags=45%, list=17%, signal=54%
GOBP_EXOCYTOSIS	GOBP_EXOCYTOSIS		76	0.543892	1.89261	0	0.0170958	0.551	659	tags=38%, list=20%, signal=46%
GOMF_CARBOHYDRATE_BINDING	GOMF_CARBOHYDRATE_BINDING		41	0.594516	1.88731	0	0.0175733	0.57	410	tags=34%, list=12%, signal=38%
GOBP_RESPONSE_TO_TRANSFORMING_GROWTH_FACTOR_BETA	GOBP_RESPONSE_TO_TRANSFORMING_GROWTH_FACTOR_BETA		69	0.554347	1.88397	0	0.0178311	0.597	529	tags=39%, list=16%, signal=46%
GOBP_INTERLEUKIN_8_PRODUCTION	GOBP_INTERLEUKIN_8_PRODUCTION		19	0.707194	1.88423	0	0.0181615	0.595	379	tags=42%, list=11%, signal=47%
GOMF_MHC_CLASS_IB_RECEPTOR_ACTIVITY	GOMF_MHC_CLASS_IB_RECEPTOR_ACTIVITY		5	0.974828	1.88147	0	0.018311	0.611	88	tags=100%, list=3%, signal=103%
GOBP_RESPONSE_TO_CHEMOKINE	GOBP_RESPONSE_TO_CHEMOKINE		22	0.680962	1.87946	0.00144092	0.0185742	0.624	218	tags=45%, list=7%, signal=48%
GOBP_T_HELPER_17_CELL_DIFFERENTIATION	GOBP_T_HELPER_17_CELL_DIFFERENTIATION		14	0.751358	1.8767	0	0.0189219	0.641	692	tags=79%, list=21%, signal=99%
GOBP_T_HELPER_17_TYPE_IMMUNE_RESPONSE	GOBP_T_HELPER_17_TYPE_IMMUNE_RESPONSE		19	0.691541	1.86674	0	0.0218637	0.697	692	tags=68%, list=21%, signal=86%
GOBP_POSITIVE_REGULATION_OF_LEUKOCYTE_MEDIATED_IMMUNITY	GOBP_POSITIVE_REGULATION_OF_LEUKOCYTE_MEDIATED_IMMUNITY		50	0.572274	1.86576	0	0.0219374	0.703	772	tags=52%, list=23%, signal=67%
GOBP_REGULATION_OF_ALPHA_BETA_T_CELL_ACTIVATION	GOBP_REGULATION_OF_ALPHA_BETA_T_CELL_ACTIVATION		52	0.568035	1.86181	0	0.0234885	0.735	831	tags=60%, list=25%, signal=78%
GOBP_CELL_CHEMOTAXIS	GOBP_CELL_CHEMOTAXIS		76	0.529684	1.85896	0	0.0243638	0.75	395	tags=32%, list=12%, signal=35%
GOBP_REGULATION_OF_RAS_PROTEIN_SIGNAL_TRANSDUCTION	GOBP_REGULATION_OF_RAS_PROTEIN_SIGNAL_TRANSDUCTION		46	0.579813	1.85635	0	0.0247571	0.759	531	tags=41%, list=16%, signal=48%
GOBP_NEGATIVE_REGULATION_OF_CELL_ACTIVATION	GOBP_NEGATIVE_REGULATION_OF_CELL_ACTIVATION		59	0.543674	1.85138	0.00247525	0.0250408	0.777	847	tags=61%, list=25%, signal=80%
GOCC_IMMUNOGLOBULIN_COMPLEX	GOCC_IMMUNOGLOBULIN_COMPLEX		5	0.971438	1.85228	0	0.0251607	0.774	27	tags=80%, list=1%, signal=81%
GOBP_CELL_FATE_COMMITMENT	GOBP_CELL_FATE_COMMITMENT		38	0.592528	1.85308	0	0.0251987	0.772	634	tags=39%, list=19%, signal=48%
GOBP_MYELOID_LEUKOCYTE_MEDIATED_IMMUNITY	GOBP_MYELOID_LEUKOCYTE_MEDIATED_IMMUNITY		26	0.646832	1.85332	0.00136612	0.0254956	0.77	517	tags=50%, list=15%, signal=59%
GOBP_POSITIVE_REGULATION_OF_SMALL_GTPASE_MEDIATED_SIGNAL_TRANSDUCTION	GOBP_POSITIVE_REGULATION_OF_SMALL_GTPASE_MEDIATED_SIGNAL_TRANSDUCTION		16	0.72351	1.84776	0	0.0264146	0.798	510	tags=63%, list=15%, signal=73%
GOBP_POSITIVE_T_CELL_SELECTION	GOBP_POSITIVE_T_CELL_SELECTION		20	0.679259	1.8429	0	0.0280241	0.82	702	tags=55%, list=21%, signal=69%
GOMF_PROTEIN_TYROSINE_PHOSPHATASE_ACTIVITY	GOMF_PROTEIN_TYROSINE_PHOSPHATASE_ACTIVITY		28	0.628216	1.8432	0.00273598	0.028232	0.82	542	tags=50%, list=16%, signal=59%
GOCC_PLASMA_MEMBRANE_SIGNALING_RECEPTOR_COMPLEX	GOCC_PLASMA_MEMBRANE_SIGNALING_RECEPTOR_COMPLEX		72	0.531987	1.83808	0	0.0285067	0.852	702	tags=54%, list=21%, signal=67%
GOBP_IMMUNE_RESPONSE_REGULATING_CELL_SURFACE_RECEPTOR_SIGNALING_PATHWAY_INVOLVED_IN_PHAGOCYTOSIS	GOBP_IMMUNE_RESPONSE_REGULATING_CELL_SURFACE_RECEPTOR_SIGNALING_PATHWAY_INVOLVED_IN_PHAGOCYTOSIS		8	0.859628	1.84018	0	0.0287534	0.829	379	tags=75%, list=11%, signal=84%
GOBP_ANTIGEN_RECEPTOR_MEDIATED_SIGNALING_PATHWAY	GOBP_ANTIGEN_RECEPTOR_MEDIATED_SIGNALING_PATHWAY		89	0.518516	1.83846	0	0.0287837	0.849	959	tags=58%, list=29%, signal=80%
GOBP_T_CELL_DIFFERENTIATION_INVOLVED_IN_IMMUNE_RESPONSE	GOBP_T_CELL_DIFFERENTIATION_INVOLVED_IN_IMMUNE_RESPONSE		31	0.610782	1.83891	0.00134953	0.0289641	0.845	717	tags=61%, list=21%, signal=77%
GOCC_INCLUSION_BODY	GOCC_INCLUSION_BODY		27	0.638825	1.83351	0.00137552	0.0304555	0.874	775	tags=52%, list=23%, signal=67%
GOMF_MHC_PROTEIN_BINDING	GOMF_MHC_PROTEIN_BINDING		25	0.640392	1.8292	0	0.0323318	0.888	355	tags=40%, list=11%, signal=44%
GOBP_PEPTIDYL_TYROSINE_DEPHOSPHORYLATION	GOBP_PEPTIDYL_TYROSINE_DEPHOSPHORYLATION		10	0.807082	1.82292	0	0.034973	0.912	507	tags=70%, list=15%, signal=82%
GOBP_REGULATION_OF_ALPHA_BETA_T_CELL_DIFFERENTIATION	GOBP_REGULATION_OF_ALPHA_BETA_T_CELL_DIFFERENTIATION		31	0.607093	1.82185	0	0.0352173	0.916	831	tags=58%, list=25%, signal=77%
GOBP_NATURAL_KILLER_CELL_CHEMOTAXIS	GOBP_NATURAL_KILLER_CELL_CHEMOTAXIS		7	0.861848	1.81468	0	0.0360219	0.941	343	tags=71%, list=10%, signal=79%
GOBP_REGULATION_OF_ADAPTIVE_IMMUNE_RESPONSE	GOBP_REGULATION_OF_ADAPTIVE_IMMUNE_RESPONSE		67	0.530991	1.81861	0	0.0360236	0.923	831	tags=54%, list=25%, signal=70%
GOBP_REGULATED_EXOCYTOSIS	GOBP_REGULATED_EXOCYTOSIS		46	0.561968	1.81762	0	0.0362462	0.927	655	tags=39%, list=20%, signal=48%
GOBP_REGULATION_OF_SMALL_GTPASE_MEDIATED_SIGNAL_TRANSDUCTION	GOBP_REGULATION_OF_SMALL_GTPASE_MEDIATED_SIGNAL_TRANSDUCTION		73	0.528998	1.81514	0	0.0362678	0.936	1055	tags=59%, list=32%, signal=84%
GOCC_EARLY_ENDOSOME_MEMBRANE	GOCC_EARLY_ENDOSOME_MEMBRANE		35	0.598893	1.81665	0	0.036358	0.933	896	tags=57%, list=27%, signal=77%
GOBP_CELL_ACTIVATION_INVOLVED_IN_IMMUNE_RESPONSE	GOBP_CELL_ACTIVATION_INVOLVED_IN_IMMUNE_RESPONSE		96	0.512245	1.8187	0	0.0364898	0.923	692	tags=43%, list=21%, signal=52%
GOBP_REGULATION_OF_NEURAL_PRECURSOR_CELL_PROLIFERATION	GOBP_REGULATION_OF_NEURAL_PRECURSOR_CELL_PROLIFERATION		17	0.692603	1.8155	0	0.0364934	0.936	456	tags=53%, list=14%, signal=61%
GOBP_PLATELET_DERIVED_GROWTH_FACTOR_RECEPTOR_SIGNALING_PATHWAY	GOBP_PLATELET_DERIVED_GROWTH_FACTOR_RECEPTOR_SIGNALING_PATHWAY		16	0.706744	1.81154	0.00294985	0.0373226	0.948	474	tags=44%, list=14%, signal=51%
GOBP_CD4_POSITIVE_ALPHA_BETA_T_CELL_DIFFERENTIATION	GOBP_CD4_POSITIVE_ALPHA_BETA_T_CELL_DIFFERENTIATION		37	0.595068	1.8088	0	0.0385048	0.954	831	tags=65%, list=25%, signal=85%
GOCC_CYTOPLASMIC_SIDE_OF_PLASMA_MEMBRANE	GOCC_CYTOPLASMIC_SIDE_OF_PLASMA_MEMBRANE		58	0.540683	1.80204	0	0.0388787	0.969	381	tags=24%, list=11%, signal=27%
GOBP_NEGATIVE_REGULATION_OF_NATURAL_KILLER_CELL_MEDIATED_IMMUNITY	GOBP_NEGATIVE_REGULATION_OF_NATURAL_KILLER_CELL_MEDIATED_IMMUNITY		12	0.762745	1.80383	0	0.0389758	0.965	371	tags=58%, list=11%, signal=65%
GOBP_CELLULAR_EXTRAVASATION	GOBP_CELLULAR_EXTRAVASATION		24	0.637313	1.80406	0.00278164	0.0392326	0.965	343	tags=33%, list=10%, signal=37%
GOBP_REGULATION_OF_LYMPHOCYTE_CHEMOTAXIS	GOBP_REGULATION_OF_LYMPHOCYTE_CHEMOTAXIS		11	0.759075	1.80211	0.00312989	0.0392932	0.969	457	tags=64%, list=14%, signal=73%
GOBP_REGULATION_OF_ERBB_SIGNALING_PATHWAY	GOBP_REGULATION_OF_ERBB_SIGNALING_PATHWAY		21	0.665503	1.80249	0	0.0395251	0.969	103	tags=24%, list=3%, signal=24%
GOBP_CALCIUM_MEDIATED_SIGNALING	GOBP_CALCIUM_MEDIATED_SIGNALING		48	0.563153	1.80423	0	0.0396008	0.964	379	tags=27%, list=11%, signal=30%
GOBP_NEGATIVE_REGULATION_OF_B_CELL_ACTIVATION	GOBP_NEGATIVE_REGULATION_OF_B_CELL_ACTIVATION		13	0.738981	1.79972	0.00149925	0.0398707	0.975	755	tags=77%, list=23%, signal=99%
GOBP_RESPONSE_TO_TUMOR_NECROSIS_FACTOR	GOBP_RESPONSE_TO_TUMOR_NECROSIS_FACTOR		82	0.512742	1.80433	0	0.0399188	0.964	586	tags=33%, list=18%, signal=39%
GOBP_LEUKOCYTE_CHEMOTAXIS	GOBP_LEUKOCYTE_CHEMOTAXIS		62	0.531227	1.80484	0.00122399	0.0400654	0.964	395	tags=34%, list=12%, signal=38%
GOBP_MYELOID_LEUKOCYTE_MIGRATION	GOBP_MYELOID_LEUKOCYTE_MIGRATION		59	0.533949	1.80533	0.00253485	0.0402992	0.962	395	tags=34%, list=12%, signal=38%
GOCC_CYTOPLASMIC_SIDE_OF_MEMBRANE	GOCC_CYTOPLASMIC_SIDE_OF_MEMBRANE		71	0.523754	1.79715	0.00122399	0.0411325	0.976	381	tags=23%, list=11%, signal=25%
GOBP_LEUKOCYTE_DEGRANULATION	GOBP_LEUKOCYTE_DEGRANULATION		24	0.635328	1.79577	0.00141044	0.0415022	0.98	395	tags=42%, list=12%, signal=47%
GOBP_CYTOKINE_PRODUCTION_INVOLVED_IN_IMMUNE_RESPONSE	GOBP_CYTOKINE_PRODUCTION_INVOLVED_IN_IMMUNE_RESPONSE		39	0.578124	1.79375	0	0.0421702	0.982	992	tags=62%, list=30%, signal=86%
GOMF_PHOSPHOLIPASE_ACTIVITY	GOMF_PHOSPHOLIPASE_ACTIVITY		10	0.784335	1.78559	0.0031746	0.0429861	0.99	218	tags=40%, list=7%, signal=43%
GOBP_NEGATIVE_REGULATION_OF_ADAPTIVE_IMMUNE_RESPONSE	GOBP_NEGATIVE_REGULATION_OF_ADAPTIVE_IMMUNE_RESPONSE		22	0.660863	1.79108	0.00137741	0.0432438	0.985	831	tags=68%, list=25%, signal=90%
GOMF_PROTEIN_PHOSPHORYLATED_AMINO_ACID_BINDING	GOMF_PROTEIN_PHOSPHORYLATED_AMINO_ACID_BINDING		22	0.628578	1.78567	0.00284091	0.0433263	0.99	507	tags=41%, list=15%, signal=48%
GOBP_NEGATIVE_REGULATION_OF_INTERLEUKIN_2_PRODUCTION	GOBP_NEGATIVE_REGULATION_OF_INTERLEUKIN_2_PRODUCTION		13	0.731232	1.78575	0.00448431	0.0437218	0.99	576	tags=62%, list=17%, signal=74%
GOBP_PHOSPHOLIPASE_C_ACTIVATING_G_PROTEIN_COUPLED_RECEPTOR_SIGNALING_PATHWAY	GOBP_PHOSPHOLIPASE_C_ACTIVATING_G_PROTEIN_COUPLED_RECEPTOR_SIGNALING_PATHWAY		10	0.789835	1.78957	0	0.0437856	0.987	233	tags=40%, list=7%, signal=43%
GOBP_REGULATION_OF_NEURON_APOPTOTIC_PROCESS	GOBP_REGULATION_OF_NEURON_APOPTOTIC_PROCESS		55	0.537398	1.78381	0	0.0437881	0.991	576	tags=35%, list=17%, signal=41%
GOBP_REGULATION_OF_NATURAL_KILLER_CELL_CHEMOTAXIS	GOBP_REGULATION_OF_NATURAL_KILLER_CELL_CHEMOTAXIS		5	0.946115	1.78625	0	0.0437913	0.99	88	tags=80%, list=3%, signal=82%
GOBP_NATURAL_KILLER_CELL_ACTIVATION_INVOLVED_IN_IMMUNE_RESPONSE	GOBP_NATURAL_KILLER_CELL_ACTIVATION_INVOLVED_IN_IMMUNE_RESPONSE		9	0.788907	1.78672	0.00315457	0.043961	0.989	655	tags=89%, list=20%, signal=110%
GOBP_TOLL_LIKE_RECEPTOR_9_SIGNALING_PATHWAY	GOBP_TOLL_LIKE_RECEPTOR_9_SIGNALING_PATHWAY		6	0.880153	1.78791	0	0.0440985	0.988	195	tags=67%, list=6%, signal=71%
GOBP_REGULATION_OF_CD4_POSITIVE_ALPHA_BETA_T_CELL_DIFFERENTIATION	GOBP_REGULATION_OF_CD4_POSITIVE_ALPHA_BETA_T_CELL_DIFFERENTIATION		23	0.629662	1.78718	0.00277008	0.0441143	0.989	831	tags=65%, list=25%, signal=86%
GOBP_REGULATION_OF_RESPONSE_TO_CYTOKINE_STIMULUS	GOBP_REGULATION_OF_RESPONSE_TO_CYTOKINE_STIMULUS		49	0.549821	1.77969	0	0.0441536	0.992	938	tags=51%, list=28%, signal=70%
GOBP_LYMPHOCYTE_ACTIVATION_INVOLVED_IN_IMMUNE_RESPONSE	GOBP_LYMPHOCYTE_ACTIVATION_INVOLVED_IN_IMMUNE_RESPONSE		71	0.515671	1.78092	0	0.0442069	0.992	717	tags=48%, list=21%, signal=60%
GOBP_NEGATIVE_REGULATION_OF_TRANSMEMBRANE_RECEPTOR_PROTEIN_SERINE_THREONINE_KINASE_SIGNALING_PATHWAY	GOBP_NEGATIVE_REGULATION_OF_TRANSMEMBRANE_RECEPTOR_PROTEIN_SERINE_THREONINE_KINASE_SIGNALING_PATHWAY		28	0.607842	1.78013	0.0042796	0.0442856	0.992	529	tags=39%, list=16%, signal=46%
GOMF_LIPASE_ACTIVITY	GOMF_LIPASE_ACTIVITY		10	0.784335	1.78132	0.00315457	0.0442951	0.992	218	tags=40%, list=7%, signal=43%
GOBP_DEFENSE_RESPONSE_TO_BACTERIUM	GOBP_DEFENSE_RESPONSE_TO_BACTERIUM		53	0.541267	1.78807	0.00129366	0.0444	0.987	572	tags=40%, list=17%, signal=47%
GOBP_POSITIVE_REGULATION_OF_PHOSPHATASE_ACTIVITY	GOBP_POSITIVE_REGULATION_OF_PHOSPHATASE_ACTIVITY		13	0.727278	1.78187	0	0.0444323	0.992	379	tags=54%, list=11%, signal=60%
GOBP_POSITIVE_REGULATION_OF_NATURAL_KILLER_CELL_ACTIVATION	GOBP_POSITIVE_REGULATION_OF_NATURAL_KILLER_CELL_ACTIVATION		10	0.800381	1.77797	0.00160256	0.0449545	0.993	371	tags=60%, list=11%, signal=67%
GOMF_PHOSPHOLIPID_BINDING	GOMF_PHOSPHOLIPID_BINDING		88	0.502145	1.77284	0	0.0466486	0.994	738	tags=36%, list=22%, signal=45%
GOBP_T_CELL_ACTIVATION_INVOLVED_IN_IMMUNE_RESPONSE	GOBP_T_CELL_ACTIVATION_INVOLVED_IN_IMMUNE_RESPONSE		42	0.562622	1.77474	0.00391134	0.0466994	0.994	717	tags=55%, list=21%, signal=69%
GOBP_NEGATIVE_REGULATION_OF_IMMUNE_RESPONSE	GOBP_NEGATIVE_REGULATION_OF_IMMUNE_RESPONSE		74	0.512157	1.77291	0	0.0470143	0.994	692	tags=36%, list=21%, signal=45%
GOBP_PHAGOCYTOSIS	GOBP_PHAGOCYTOSIS		64	0.522261	1.77119	0.00125786	0.0470402	0.996	503	tags=30%, list=15%, signal=34%
GOBP_REGULATION_OF_OSTEOCLAST_DIFFERENTIATION	GOBP_REGULATION_OF_OSTEOCLAST_DIFFERENTIATION		16	0.706254	1.77357	0.00295858	0.0470607	0.994	992	tags=100%, list=30%, signal=142%
GOBP_P38MAPK_CASCADE	GOBP_P38MAPK_CASCADE		17	0.683949	1.77137	0.00439239	0.047334	0.996	297	tags=41%, list=9%, signal=45%
GOMF_PROTEIN_TYROSINE_THREONINE_PHOSPHATASE_ACTIVITY	GOMF_PROTEIN_TYROSINE_THREONINE_PHOSPHATASE_ACTIVITY		6	0.882494	1.76646	0.00165017	0.049241	0.996	397	tags=100%, list=12%, signal=113%
GOBP_REGULATION_OF_NUCLEOTIDE_BINDING_OLIGOMERIZATION_DOMAIN_CONTAINING_SIGNALING_PATHWAY	GOBP_REGULATION_OF_NUCLEOTIDE_BINDING_OLIGOMERIZATION_DOMAIN_CONTAINING_SIGNALING_PATHWAY		7	0.846283	1.76552	0	0.049484	0.997	219	tags=71%, list=7%, signal=76%
GOBP_NEGATIVE_REGULATION_OF_INFLAMMATORY_RESPONSE	GOBP_NEGATIVE_REGULATION_OF_INFLAMMATORY_RESPONSE		43	0.546674	1.76666	0.00406504	0.0495382	0.996	379	tags=37%, list=11%, signal=41%
GOBP_POSITIVE_REGULATION_OF_CYTOKINE_PRODUCTION_INVOLVED_IN_IMMUNE_RESPONSE	GOBP_POSITIVE_REGULATION_OF_CYTOKINE_PRODUCTION_INVOLVED_IN_IMMUNE_RESPONSE		28	0.606858	1.76044	0.0027248	0.0495587	0.997	772	tags=54%, list=23%, signal=69%
GOMF_MHC_CLASS_I_PROTEIN_COMPLEX_BINDING	GOMF_MHC_CLASS_I_PROTEIN_COMPLEX_BINDING		5	0.929659	1.76258	0	0.0495786	0.997	150	tags=80%, list=4%, signal=84%
GOBP_LENS_DEVELOPMENT_IN_CAMERA_TYPE_EYE	GOBP_LENS_DEVELOPMENT_IN_CAMERA_TYPE_EYE		14	0.707046	1.76464	0.00313972	0.0496969	0.997	586	tags=71%, list=18%, signal=86%
GOBP_REGULATION_OF_TUBE_SIZE	GOBP_REGULATION_OF_TUBE_SIZE		17	0.685958	1.76139	0.00151515	0.0497358	0.997	224	tags=29%, list=7%, signal=31%
GOCC_AGGRESOME	GOCC_AGGRESOME		12	0.734795	1.76285	0.00623053	0.0497686	0.997	775	tags=75%, list=23%, signal=97%
GOBP_T_CELL_RECEPTOR_SIGNALING_PATHWAY	GOBP_T_CELL_RECEPTOR_SIGNALING_PATHWAY		72	0.513664	1.7606	0	0.0498274	0.997	959	tags=61%, list=29%, signal=84%
GOBP_VASCULOGENESIS	GOBP_VASCULOGENESIS		18	0.66197	1.76668	0.00449102	0.0499495	0.996	474	tags=56%, list=14%, signal=64%
GOBP_NEGATIVE_REGULATION_OF_TRANSFORMING_GROWTH_FACTOR_BETA_RECEPTOR_SIGNALING_PATHWAY	GOBP_NEGATIVE_REGULATION_OF_TRANSFORMING_GROWTH_FACTOR_BETA_RECEPTOR_SIGNALING_PATHWAY		25	0.612338	1.75863	0.00420757	0.0499664	0.998	529	tags=40%, list=16%, signal=47%
GOBP_REGULATION_OF_VASCULATURE_DEVELOPMENT	GOBP_REGULATION_OF_VASCULATURE_DEVELOPMENT		53	0.536928	1.75921	0	0.0499692	0.998	769	tags=49%, list=23%, signal=63%
GOMF_PROTEIN_ANTIGEN_BINDING	GOMF_PROTEIN_ANTIGEN_BINDING		5	0.932911	1.76157	0	0.0499937	0.997	36	tags=60%, list=1%, signal=61%
GOBP_POSITIVE_REGULATION_OF_MACROPHAGE_MIGRATION	GOBP_POSITIVE_REGULATION_OF_MACROPHAGE_MIGRATION		6	0.898287	1.76313	0.00166945	0.0499939	0.997	131	tags=67%, list=4%, signal=69%
