# Supplementary material for: Interleukin-15-armored GPC3-CAR T cells for patients with solid cancers
Source: Research Square preprint supplement (doi:10.21203/rs.3.rs-4103623/v1), 2024-04-03
Supplement: Supplementary file 2 [file 8ee5e4bff4076fb4b04e3eef.xlsx]

## Sheet: Supplementary table 1 
	Cluster	Enrich	p-val (2 tail)
	0	1.31468	4.10717e-30
	1	1.02441	0.0192646
	2	1.24739	3.14017e-10
	3	0.955576	0.0132051
	4	0.180309	7.06888e-120
	5	1.8428	1.73185e-36
	6	0.806502	0.000677759
	7	0.183804	2.19526e-24
	8	0.346746	3.1865e-12
	9	0	N/a
