# Supplementary material for: Interleukin-15-armored GPC3-CAR T cells for patients with solid cancers
Source: Research Square preprint supplement (doi:10.21203/rs.3.rs-4103623/v1), 2024-04-03
Supplement: Supplementary file 2 [file b40e2f7faa58ad9dc01da0ce.pdf]

**DOSE LEVEL 1 - Patient characteristics**

| Patient ID | Age (years) | Gender | Tumor  | Extrahepatic metastases | Site(s) of Active Disease                          | Response            |
|------------|-------------|--------|--------|-------------------------|----------------------------------------------------|---------------------|
| DL1.CAR 1  | 3           | Female | HB     | +                       | Liver and lungs                                    | Progressive disease |
| DL1.CAR 2  | 7           | Female | HC-NOS | +                       | Lungs                                              | Stable disease      |
| DL1.CAR 3  | 13          | Female | HB     | +                       | Lungs                                              | Progressive disease |
| DL1.CAR 4  | 68          | Female | HCC    | +                       | Liver, retroperitoneal nodes, and para-aortic mass | Progressive disease |
| DL1.CAR 5  | 67          | Female | HCC    | +                       | Liver and bone                                     | Stable disease      |
| DL1.CAR 6  | 50          | Female | HCC    | +                       | Liver and lungs                                    | Stable disease      |

**DOSE LEVEL 2 - Patient characteristics**

|           |    |        |        |   |                                                       |                     |
|-----------|----|--------|--------|---|-------------------------------------------------------|---------------------|
| CAR 1     | 4  | Male   | HB     | + | Lungs                                                 | Progressive disease |
| CAR 2     | 4  | Male   | HB     | + | Lungs                                                 | Progressive disease |
| CAR 3     | 4  | Male   | HB     | + | Lungs                                                 | Stable disease      |
| CAR 4     | 62 | Female | HCC    | + | Liver and lungs                                       | Progressive disease |
| CAR 5     | 63 | Male   | HCC    | + | Liver with invasion of portal node and abdominal wall | Stable disease      |
| CAR 6     | 72 | Male   | HCC    | + | Liver and retroperitoneal lymph node                  | Stable disease      |
| 15.CAR 1  | 20 | Male   | HCC    | + | Liver, lungs, and bone                                | Partial response    |
| 15.CAR 2  | 8  | Female | HCC    | + | Liver and lungs                                       | Progressive disease |
| 15.CAR 3  | 10 | Male   | HCC    | + | Liver and lungs                                       | Progressive disease |
| 15.CAR 4  | 11 | Female | HC-NOS | + | Liver and lungs                                       | Stable disease      |
| 15.CAR 5  | 11 | Male   | HC-NOS | - | Liver                                                 | Progressive disease |
| 15.CAR 6  | 6  | Female | WT     | + | Liver and Lungs                                       | Progressive disease |
| 15.CAR 7  | 20 | Female | NET    | + | Pancreas, Liver                                       | Stable disease      |
| 15.CAR 8  | 11 | Male   | ERMS   | + | Right Nasopharynx                                     | Partial response    |
| 15.CAR 9  | 68 | Male   | HCC    | - | Liver                                                 | Partial response    |
| 15.CAR 10 | 65 | Male   | HCC    | + | Liver and Retroperitoneal lymph node                  | Stable disease      |
| 15.CAR 11 | 32 | Male   | YST    | + | Mediastinum, Axillary nodes, and Bone                 | Stable disease      |
| 15.CAR 12 | 69 | Male   | HCC    | - | Liver                                                 | Partial response    |

HCC: Hepatocellular carcinoma. HC-NOS: Hepatocellular neoplasm not otherwise specified. Cy: cyclophosphamide. Flu: Fludarabine. YST: Yolk sac tumor; WT: Wilms Tumor; NET: neuroendocrine tumor of the pancreas, ERMS: Embryonal rhabdomyosarcoma.

**Extended data 1. Patient characteristics:** Patients infused CAR on DL1 (top section) and with CAR or 15.CAR T cell on DL2 (bottom section) are described for general demographics, underlying malignancy, extent of disease and response to therapy.
